# Supplementary material
Source: publisher figshare collection journal article supplement (https://gsapubs.figshare.com/articles/dataset/_/19449827)
Supplement: Supplementary file 2 [file 1]

Archive with 7 entries (7 files):
- GS2459_TabS4.xlsx
- GS2459_TabS5.xlsx
- GS2459_TabS6.xlsx
- GS2459_SuppInfo.pdf
- GS2459_TabS1.xlsx
- GS2459_TabS2.xlsx
- GS2459_TabS3.xlsx
