# Supplementary material
Source: publisher figshare collection journal article supplement (https://gsapubs.figshare.com/articles/dataset/_/19449827)
Supplement: Supplementary file 2 [file 1 › GS2459_TabS1.xlsx]

## Sheet: Samples Table S1
Table S1: Eastern Stikinia sample location
Sample	Field number	Latitude	Longitude	Group	Formation	Rock type
T-san1	19gj18-3	56.2273	-126.259	Hazelton	Telkwa	feldspathic sandstone
A-san1	19lo14-5	56.2442	-126.385	Asitka		sandstone with qaurtz and lithoclasts
19lo7-3c	19lo7-3c	56.403	-126.296	Asitka		red chert
A-rhy1	19lo7-3d	56.403	-126.296	Asitka		fine-grained white rhyolite
A-rhy2	19lo5-5	56.2872	-126.229	Asitka		fragmetnal rhyolite
Ootes, L., Milidragovic, D., Friedman, R., Wall, C., Cordey, F., Luo, Y., Jones, G., Pearson, D.G., and Bergen, A., 2022, A juvenile Paleozoic ocean floor origin for eastern Stikinia, Canadian Cordillera: Geosphere, v. 18, https://doi.org/10.1130/GES02459.1

## Sheet: PlotDat11
Source sheet	TO-19-16 UPb_All_Integrations	0.165	0.0347	0.133967	0.02	0.125449	0.0187893	0.234761	0.0350135	0.274492	0.0345148	0.274821	0.0357752	0.244806	0.0341588	0.230836	0.0330193	0.322194	0.0387293	0.275537	0.0344639	0.268149	0.0342025	0.286716	0.0352181	0.295388	0.0387835	0.222582	0.0304123	0.289403	0.035697	0.267149	0.0353411	0.245821	0.0292727	0.304537	0.0356122	0.281522	0.0355922	0.271373	0.032602	0.287403	0.035405	0.270716	0.0329863	0.24003	0.0331265	0.291059	0.0322778
Plot name	Concordia11	0.239	0.0342	0.133967	0.02	0.147837	0.021955	0.233807	0.0354291	0.273714	0.0348322	0.274125	0.0360785	0.244351	0.0343616	0.230251	0.0333816	0.321356	0.0390947	0.274038	0.034866	0.267532	0.034449	0.285912	0.0354831	0.294505	0.0390139	0.221787	0.0306165	0.288279	0.036076	0.266534	0.0355444	0.245125	0.0294737	0.303037	0.0360073	0.280736	0.0359476	0.270729	0.032814	0.286279	0.0356818	0.269913	0.0332637	0.239548	0.0333215	0.290096	0.032632
Plot Type	1	0.243	0.0357	0.143556	0.0213538	0.17067	0.0251306	0.230977	0.0358248	0.271418	0.035122	0.272068	0.0363653	0.243007	0.0345544	0.228514	0.0337335	0.318872	0.0394358	0.26961	0.0352434	0.265712	0.0346759	0.283537	0.0357226	0.291896	0.0392324	0.21947	0.0307927	0.284957	0.0364342	0.264715	0.0357384	0.243069	0.0296623	0.298608	0.0363715	0.278402	0.0362853	0.268829	0.0330026	0.282958	0.0359418	0.267541	0.0335253	0.238125	0.0335063	0.287249	0.0329673
1st free col	169	0.224	0.03413	0.153227	0.0227095	0.193957	0.028316	0.226347	0.0361898	0.267706	0.0353714	0.268741	0.036623	0.240831	0.0347285	0.225672	0.0340654	0.314809	0.0397432	0.262445	0.0355795	0.262768	0.0348733	0.279697	0.0359262	0.287674	0.0394293	0.215819	0.0309265	0.279584	0.036756	0.261773	0.0359145	0.239742	0.0298303	0.291442	0.0366888	0.274584	0.0365962	0.265756	0.0331597	0.277584	0.0361738	0.263702	0.0337595	0.235822	0.033673	0.282643	0.033269
Sigma Level	2	0.188	0.033	0.16298	0.0240669	0.217708	0.0315113	0.220044	0.0365142	0.262739	0.0355697	0.26429	0.0368403	0.237921	0.0348766	0.221803	0.0343683	0.309278	0.0400084	0.252857	0.0358598	0.258829	0.0350325	0.27456	0.036085	0.282024	0.0395961	0.21113	0.0310071	0.272393	0.0370272	0.257835	0.036065	0.23529	0.0299703	0.281854	0.0369455	0.269386	0.0368717	0.261646	0.0332783	0.270393	0.0363677	0.258566	0.0339562	0.23274	0.0338142	0.276479	0.0335241
Absolute Errs	TRUE	0.261	0.0382	0.172815	0.0254262	0.24193	0.0347165	0.212239	0.0367891	0.256734	0.035708	0.258907	0.0370078	0.234402	0.034992	0.217011	0.0346338	0.302431	0.0402244	0.241264	0.0360718	0.254067	0.0351465	0.268348	0.0361919	0.275193	0.0397255	0.205781	0.031028	0.263698	0.0372361	0.253074	0.0361834	0.229908	0.0300762	0.270261	0.0371303	0.26295	0.0371044	0.256676	0.0333532	0.261699	0.0365148	0.252355	0.0341067	0.229014	0.0339237	0.269027	0.0337212
Symbol Type	1	0.207	0.0343	0.182733	0.0267872	0.266635	0.0379317	0.203146	0.037007	0.249955	0.0357805	0.25283	0.0371182	0.230428	0.0350697	0.211428	0.0348547	0.294453	0.0403851	0.228175	0.0362065	0.24869	0.0352105	0.261335	0.0362424	0.267479	0.0398118	0.200208	0.0309875	0.253881	0.0373735	0.247698	0.0362646	0.223831	0.0301434	0.257171	0.037235	0.255452	0.0372878	0.251066	0.0333813	0.251882	0.0366089	0.245343	0.0342044	0.224806	0.0339969	0.260612	0.0338519
Inverse Plot	FALSE	0.24	0.034	0.192735	0.0281501	0.291832	0.0411569	0.193012	0.037162	0.242696	0.0357839	0.246323	0.0371665	0.226173	0.0351063	0.205206	0.0350251	0.285563	0.0404862	0.214159	0.0362578	0.242934	0.0352216	0.253827	0.0362342	0.25922	0.0398513	0.19486	0.0308889	0.24337	0.0374333	0.241942	0.0363048	0.217324	0.0301689	0.243155	0.0372552	0.247096	0.037417	0.245059	0.0333613	0.24137	0.0366458	0.237835	0.0342452	0.220301	0.0340303	0.251602	0.0339104
Color Plot	TRUE	0.25	0.0349	0.202821	0.0295148	0.317529	0.0443921	0.182114	0.0372498	0.235276	0.0357181	0.23967	0.0371508	0.221824	0.0351003	0.198515	0.0351402	0.276003	0.040525	0.199831	0.0362235	0.237049	0.0351792	0.246151	0.0361677	0.250777	0.0398422	0.190172	0.0307401	0.232624	0.0374131	0.236057	0.0363025	0.210671	0.0301516	0.228827	0.0371899	0.23811	0.0374884	0.238918	0.0332939	0.230624	0.0366238	0.230159	0.0342271	0.215696	0.0340227	0.242392	0.0338941
3D plot	FALSE	0.255	0.03874	0.212993	0.0308812	0.343738	0.0476374	0.170749	0.0372681	0.228019	0.035586	0.233164	0.0370717	0.217569	0.0350519	0.191536	0.035197	0.266034	0.0405003	0.185816	0.0361052	0.231293	0.0350854	0.238643	0.0360458	0.242518	0.039785	0.186524	0.0305532	0.222112	0.0373136	0.230301	0.0362577	0.204164	0.0300923	0.214813	0.0370421	0.228739	0.0375002	0.232912	0.0331823	0.220113	0.036544	0.222651	0.0341511	0.211191	0.0339743	0.233382	0.0338038
Linear	FALSE	0.203	0.03027	0.223251	0.0322495	0.370468	0.0508927	0.159228	0.0372163	0.221242	0.0353932	0.227087	0.0369326	0.213596	0.0349632	0.184462	0.0351938	0.255927	0.0404129	0.172728	0.035908	0.225918	0.0349441	0.231632	0.0358739	0.234805	0.039682	0.18421	0.0303434	0.212296	0.0371392	0.224925	0.0361723	0.198087	0.0299936	0.201724	0.0368181	0.219239	0.0374519	0.227304	0.0330312	0.210296	0.0364098	0.215639	0.0340203	0.206984	0.0338873	0.224968	0.0336434
Data Range	D64:H143	0.238	0.0356	0.233596	0.0336196	0.397729	0.0541582	0.147864	0.0370959	0.215241	0.0351483	0.221705	0.0367397	0.210077	0.034838	0.177484	0.0351307	0.245959	0.0402651	0.161136	0.0356405	0.221158	0.0347615	0.225424	0.0356593	0.227974	0.0395379	0.183418	0.0301277	0.203602	0.0368975	0.220164	0.0360501	0.192706	0.0298597	0.190133	0.0365277	0.209868	0.037345	0.222337	0.0328473	0.201603	0.0362272	0.20943	0.0338407	0.203258	0.0337654	0.217516	0.0334199
Filled Symbols	FALSE	0.239	0.03533	0.244028	0.0349916	0.425533	0.0574338	0.136967	0.0369101	0.210278	0.034862	0.217254	0.0365013	0.207167	0.034682	0.170792	0.0350096	0.236401	0.040061	0.15155	0.0353144	0.217222	0.0345457	0.220289	0.0354116	0.222325	0.039359	0.184213	0.0299235	0.196412	0.0365991	0.216227	0.0358965	0.188255	0.0296966	0.180547	0.0361837	0.200883	0.0371822	0.21823	0.0326386	0.194413	0.036004	0.204294	0.0336199	0.200177	0.033614	0.211353	0.0331431
ConcAge	FALSE	0.214	0.02919	0.254548	0.0363653	IsoLine	IsoLine	0.126835	0.0366641	0.206571	0.0345467	0.213929	0.0362279	0.204992	0.0345018	0.16457	0.0348336	0.227514	0.0398061	0.144387	0.034944	0.214281	0.034306	0.216453	0.0351415	0.218103	0.0391529	0.18653	0.0297473	0.19104	0.0362571	0.213284	0.035718	0.184929	0.0295113	0.173385	0.0358011	0.192529	0.0369682	0.215162	0.0324143	0.18904	0.03575	0.200457	0.0333676	0.197874	0.0334397	0.206748	0.0328251
ConcSwap	FALSE	0.236	0.0353	0.265158	0.0377409			0.117744	0.0363645	0.20428	0.0342163	0.211874	0.0359314	0.203649	0.0343053	0.158988	0.0346076	0.21954	0.0395075	0.13996	0.0345454	0.212464	0.0340529	0.214084	0.0348609	0.215494	0.0389288	0.190181	0.0296135	0.18772	0.0358863	0.211466	0.0355227	0.182874	0.029312	0.168959	0.0353966	0.185033	0.0367086	0.213267	0.032184	0.18572	0.0354764	0.198085	0.0330949	0.196451	0.0332501	0.203903	0.0324798
1st Symbol-row	1	0.224	0.0353	0.275857	0.0391183			0.109942	0.0360194	0.203508	0.0338852	0.211179	0.0356248	0.203194	0.0341012	0.154196	0.0343378	0.212698	0.0391731	0.138463	0.0341361	0.211851	0.0337975	0.213284	0.0345819	0.214612	0.0386965	0.19487	0.0295329	0.186597	0.035503	0.210851	0.0353189	0.182179	0.0291073	0.167463	0.0349878	0.1786	0.0364106	0.212627	0.031958	0.184597	0.035195	0.197284	0.0328137	0.19597	0.0330535	0.202941	0.0321222
		0.242	0.03228	0.286646	0.0404975			0.103642	0.0356384	0.204286	0.0335678	0.211875	0.0353215	0.203649	0.0338984	0.150327	0.0340315	0.207172	0.0388122	0.139962	0.033734	0.212468	0.033551	0.214088	0.0343169	0.215495	0.0384661	0.200219	0.029512	0.187721	0.035124	0.211466	0.0351156	0.182875	0.0289063	0.168963	0.0345927	0.173406	0.0360823	0.213271	0.031746	0.185721	0.0349182	0.198087	0.0325363	0.196452	0.0328585	0.203904	0.031768
		0.236	0.0353	0.297527	0.0418786			0.0990153	0.0352318	0.206582	0.033278	0.213932	0.0350347	0.204993	0.0337056	0.147485	0.033697	0.203116	0.0384346	0.14439	0.0333566	0.214288	0.0333241	0.216463	0.0340774	0.218104	0.0382476	0.205792	0.0295525	0.191043	0.0347658	0.213285	0.0349216	0.184931	0.0287177	0.173392	0.0342285	0.169591	0.0357326	0.215171	0.0315574	0.189042	0.0346582	0.200459	0.0322747	0.197875	0.0326737	0.206751	0.0314327
		0.234	0.0329	0.3085	0.0432615			0.0961888	0.0348106	0.210294	0.0330286	0.217259	0.034777	0.207169	0.0335315	0.145748	0.0333435	0.200638	0.0380507	0.151555	0.0330205	0.217232	0.0331267	0.220303	0.0338738	0.222326	0.0380507	0.21114	0.0296511	0.196416	0.034444	0.216227	0.0347455	0.188258	0.0285497	0.180558	0.0339112	0.167261	0.0353712	0.218244	0.0314003	0.194416	0.0344262	0.204298	0.0320405	0.200178	0.032507	0.211357	0.031131
		0.218	0.03309	0.319565	0.0446462			0.0952392	0.0343865	0.215261	0.0328303	0.22171	0.0345597	0.210079	0.0333834	0.145164	0.0329807	0.199806	0.0376707	0.161143	0.0327402	0.221171	0.0329675	0.22544	0.033715	0.227976	0.0378839	0.215828	0.0297999	0.203607	0.0341728	0.220165	0.034595	0.19271	0.0284097	0.190146	0.0336545	0.166478	0.0350078	0.222354	0.0312817	0.201607	0.0342323	0.209434	0.0318438	0.20326	0.0323658	0.217521	0.0308759
		0.247	0.0322	0.330724	0.0460327			0.0961925	0.0339709	0.221266	0.032692	0.227093	0.0343922	0.213598	0.033268	0.145749	0.0326184	0.200644	0.0373053	0.172736	0.0325282	0.225933	0.0328535	0.231652	0.0336081	0.234807	0.0377545	0.219476	0.0299868	0.212302	0.0339639	0.224926	0.0344766	0.198092	0.0283038	0.201739	0.0334697	0.167264	0.0346524	0.227324	0.0312068	0.210301	0.0340852	0.215645	0.0316933	0.206986	0.0322563	0.224973	0.0306788
		0.252	0.03281	0.341978	0.0474212			0.0990228	0.0335752	0.228045	0.0326195	0.23317	0.0342818	0.217572	0.0331903	0.147486	0.0322665	0.203128	0.0369642	0.185825	0.0323935	0.23131	0.0327895	0.238665	0.0335576	0.242521	0.0376682	0.22179	0.0301966	0.222119	0.0338265	0.230302	0.0343954	0.204169	0.0282366	0.214829	0.033365	0.169598	0.0343147	0.232934	0.0311787	0.220118	0.0339911	0.222657	0.0315956	0.211194	0.0321831	0.233388	0.0305481
		0.289	0.0386	0.353327	0.0488114			0.103653	0.0332102	0.235304	0.0326161	0.239677	0.0342335	0.221827	0.0331537	0.150328	0.0319346	0.207191	0.0366568	0.199841	0.0323422	0.237066	0.0327784	0.246173	0.0335658	0.25078	0.0376287	0.222582	0.0304123	0.23263	0.0337667	0.236058	0.0343552	0.210676	0.0282111	0.228845	0.0333448	0.173416	0.0340038	0.238941	0.0311987	0.23063	0.0339542	0.230165	0.0315548	0.215699	0.0321497	0.242398	0.0304896
		0.265	0.04	0.364771	0.0502035			0.109956	0.0328858	0.242724	0.0326819	0.24633	0.0342492	0.226176	0.0331597	0.154197	0.0316317	0.212722	0.0363916	0.214169	0.0323765	0.242951	0.0328208	0.253849	0.0336323	0.259223	0.0376378			0.243376	0.0337869	0.241943	0.0343575	0.217329	0.0282284	0.243173	0.0334101	0.178614	0.0337283	0.245082	0.0312661	0.241376	0.0339762	0.237841	0.0315729	0.220304	0.0321573	0.251608	0.0305059
		0.273	0.0349	0.376313	0.0515974			0.117761	0.0326109	0.249981	0.032814	0.252836	0.0343283	0.230431	0.0332081	0.158989	0.0313662	0.219569	0.0361756	0.228184	0.0324948	0.248707	0.0329146	0.261357	0.0337542	0.267482	0.037695			0.253888	0.0338864	0.247699	0.0344023	0.223836	0.0282877	0.257187	0.0335579	0.18505	0.0334956	0.251088	0.0313777	0.251887	0.034056	0.245349	0.0316489	0.224809	0.0322057	0.260618	0.0305962
		0.378	0.0519	0.387952	0.0529932			0.126854	0.032393	0.256758	0.0330068	0.258913	0.0344674	0.234404	0.0332968	0.164572	0.0311453	0.227547	0.0360149	0.241272	0.032692	0.254082	0.0330559	0.268368	0.0339261	0.275195	0.037798			0.263704	0.0340608	0.253075	0.0344877	0.229913	0.0283864	0.270276	0.0337819	0.192548	0.0333122	0.256696	0.0315288	0.261704	0.0341902	0.252361	0.0317797	0.229016	0.0322927	0.269032	0.0307566
		0.271	0.0347	0.399689	0.0543909			0.136988	0.032238	0.262759	0.0332517	0.264295	0.0346603	0.237923	0.033422	0.170794	0.0309749	0.236437	0.0359138	0.252864	0.0329595	0.258842	0.0332385	0.274576	0.0341407	0.282026	0.0379421			0.272398	0.0343025	0.257836	0.0346099	0.235294	0.0285203	0.281867	0.0340723	0.200904	0.033183	0.261663	0.0317127	0.270397	0.0343728	0.25857	0.0319593	0.232742	0.0324146	0.276484	0.0309801
		0.388	0.0487	0.411526	0.0557904			0.147886	0.0321502	0.267722	0.033538	0.268746	0.0348987	0.240833	0.033578	0.177485	0.0308598	0.245997	0.035875	0.26245	0.0332856	0.262778	0.0334543	0.279711	0.0343884	0.287675	0.038121			0.279588	0.0346009	0.261773	0.0347635	0.239745	0.0286834	0.291453	0.0344163	0.20989	0.0331116	0.26577	0.0319214	0.277587	0.034596	0.263706	0.0321801	0.235823	0.032566	0.282647	0.0312569
		0.246	0.0337	0.423463	0.0571917			0.159251	0.0321319	0.271429	0.0338533	0.272071	0.0351721	0.243008	0.0337582	0.184464	0.030803	0.255966	0.0358997	0.269613	0.033656	0.265719	0.033694	0.283547	0.0346585	0.291897	0.0383271			0.28496	0.0349429	0.264716	0.034942	0.243071	0.0288687	0.298615	0.0347989	0.219261	0.0330998	0.268838	0.0321457	0.28296	0.03485	0.267543	0.0324324	0.238126	0.0327403	0.287252	0.0315749
		0.207	0.0335	0.435501	0.0585949			0.170772	0.0321837	0.27372	0.0341837	0.274126	0.0354686	0.244351	0.0339547	0.191538	0.0308062	0.266073	0.0359871	0.27404	0.0340546	0.267536	0.0339471	0.285916	0.0349391	0.294506	0.0385512			0.28828	0.0353137	0.266534	0.0351373	0.245126	0.029068	0.303041	0.0352034	0.228761	0.0331481	0.270733	0.032376	0.28628	0.0351236	0.269915	0.0327051	0.239549	0.0329299	0.290097	0.0319202
		0.377	0.0519	0.44764	0.06			0.182136	0.0323041	0.274492	0.0345148	0.274821	0.0357752	0.244806	0.0341588	0.198516	0.0308693	0.276041	0.0361349	0.275537	0.0344639	0.268149	0.0342025	0.286716	0.0352181	0.295388	0.0387835			0.289403	0.035697	0.267149	0.0353411	0.245821	0.0292727	0.304537	0.0356122	0.238132	0.033255	0.271373	0.032602	0.287403	0.035405	0.270716	0.0329863	0.24003	0.0331265	0.291059	0.0322778
		0.244	0.037	0.44764	0.06			0.193033	0.0324899							0.205208	0.0309904	0.285599	0.036339																			0.247117	0.0334178
		0.227	0.0332	IsoLine	IsoLine			0.203165	0.0327359							0.21143	0.0311664	0.294486	0.0365939																			0.255471	0.0336318
		0.225	0.0337					0.212256	0.0330355							0.217012	0.0313924	0.30246	0.0368925																			0.262967	0.0338914
		0.268	0.0391					0.220058	0.0333806							0.221804	0.0316622	0.309302	0.0372269																			0.2694	0.0341894
		0.381	0.0513					0.226358	0.0337616							0.225673	0.0319685	0.314828	0.0375878																			0.274594	0.0345177
		0.228	0.0359					0.230985	0.0341682							0.228515	0.032303	0.318884	0.0379654																			0.278409	0.0348674
		0.407	0.0512					0.233811	0.0345894							0.230252	0.0326565	0.321362	0.0383493																			0.280739	0.0352288
		0.259	0.034					0.234761	0.0350135							0.230836	0.0330193	0.322194	0.0387293																			0.281522	0.0355922
		0.234	0.0363
		0.24	0.035
		0.275	0.03791
		0.223	0.03244
		0.247	0.03476
		0.259	0.0346
		0.241	0.03438
		0.365	0.0504
		0.246	0.0335
		0.29	0.03819
		0.304	0.04
		0.352	0.049
		0.25	0.03429
		0.241	0.03396
		0.231	0.0333
		0.235	0.0339
		0.253	0.0343
		0.26	0.0388
		0.27	0.03771
		0.278	0.0364
		0.296	0.0407
		0.236	0.03477
		0.381	0.0508
		0.257	0.0347
		0.284	0.04023
		0.245	0.03593
		0.388	0.05215
		0.209	0.03499
		0.255	0.0399
		0.361	0.0527
		0.207	0.03241
		0.233	0.0344
		0.213	0.03356
		0.23	0.0312
		0.246	0.0349
		0.252	0.03679
		0.219	0.03341
		0.31	0.0388
		0.246	0.0358
		0.248	0.03673
		0.265	0.0396
		IsoLine	IsoLine
[truncated: 118 more columns]

## Sheet: PlotDat12
Source sheet	TO-19-16 UPb_All_Integrations	80	0	185	0	80	0
Plot name	ProbDens12	80.14	0	192	0	359.86	0
Plot Type	16	80.28	0	192	1
1st free col	9	80.42	0	185	1
Sigma Level	2	80.56	0	185	0
Absolute Errs	TRUE	80.7	0	ErrBox	ErrBox
Symbol Type	1	80.84	0	192	0
Inverse Plot	FALSE	80.98	0	199	0
Color Plot	TRUE	81.12	0	199	2
3D plot	FALSE	81.26	0	192	2
Linear	FALSE	81.4	0	192	0
Data Range	N64:O143	81.54	0	ErrBox	ErrBox
Filled Symbols	TRUE	81.68	0	199	0
ConcAge	FALSE	81.82	0	206	0
ConcSwap	FALSE	81.96	0	206	4
1st Symbol-row	1	82.1	0	199	4
		82.24	0	199	0
		82.38	0	ErrBox	ErrBox
		82.52	0	206	0
		82.66	0	213	0
		82.8	0	213	10
		82.94	0	206	10
		83.08	0	206	0
		83.22	0	ErrBox	ErrBox
		83.36	0	213	0
		83.5	0	220	0
		83.64	0	220	15
		83.78	0	213	15
		83.92	0	213	0
		84.06	0	ErrBox	ErrBox
		84.2	0	220	0
		84.34	0	227	0
		84.48	0	227	16
		84.62	0	220	16
		84.76	0	220	0
		84.9	0	ErrBox	ErrBox
		85.04	0	227	0
		85.18	0	234	0
		85.32	0	234	6
		85.46	0	227	6
		85.6	0	227	0
		85.74	0	ErrBox	ErrBox
		85.88	0	234	0
		86.02	0	241	0
		86.16	0	241	3
		86.3	0	234	3
		86.44	0	234	0
		86.58	0	ErrBox	ErrBox
		86.72	0	241	0
		86.86	0	248	0
		87	0	248	7
		87.14	0	241	7
		87.28	0	241	0
		87.42	0	ErrBox	ErrBox
		87.56	0	248	0
		87.7	0	255	0
		87.84	0	255	5
		87.98	0	248	5
		88.12	0	248	0
		88.26	0	ErrBox	ErrBox
		88.4	0	255	0
		88.54	0	262	0
		88.68	0	262	1
		88.82	0	255	1
		88.96	0	255	0
		89.1	0	ErrBox	ErrBox
		89.24	0	304	0
		89.38	0	311	0
		89.52	0	311	2
		89.66	0	304	2
		89.8	0	304	0
		89.94	0	ErrBox	ErrBox
		90.08	0	311	0
		90.22	0	318	0
		90.36	0	318	1
		90.5	0	311	1
		90.64	0	311	0
		90.78	0	ErrBox	ErrBox
		90.92	0	318	0
		91.06	0	325	0
		91.2	0	325	3
		91.34	0	318	3
		91.48	0	318	0
		91.62	0	ErrBox	ErrBox
		91.76	0	325	0
		91.9	0	332	0
		92.04	0	332	4
		92.18	0	325	4
		92.32	0	325	0
		92.46	0	ErrBox	ErrBox
		92.6	0
		92.74	0
		92.88	0
		93.02	0
		93.16	0
		93.3	0
		93.44	0
		93.58	0
		93.72	0
		93.86	0
		94	0
		94.14	0
		94.28	0
		94.42	0
		94.56	0
		94.7	0
		94.84	0
		94.98	0
		95.12	0
		95.26	0
		95.4	0
		95.54	0
		95.68	0
		95.82	0
		95.96	0
		96.1	0
		96.24	0
		96.38	0
		96.52	0
		96.66	0
		96.8	0
		96.94	0
		97.08	0
		97.22	0
		97.36	0
		97.5	0
		97.64	0
		97.78	0
		97.92	0
		98.06	0
		98.2	0
		98.34	0
		98.48	0
		98.62	0
		98.76	0
		98.9	0
		99.04	0
		99.18	0
		99.32	0
		99.46	0
		99.6	0
		99.74	0
		99.88	0
		100.02	0
		100.16	0
		100.3	0
		100.44	0
		100.58	0
		100.72	0
		100.86	0
		101	0
		101.14	0
		101.28	0
		101.42	0
		101.56	0
		101.7	0
		101.84	0
		101.98	0
		102.12	0
		102.26	0
		102.4	0
		102.54	0
		102.68	0
		102.82	0
		102.96	0
		103.1	0
		103.24	0
		103.38	0
		103.52	0
		103.66	0
		103.8	0
		103.94	0
		104.08	0
		104.22	0
		104.36	0
		104.5	0
		104.64	0
		104.78	0
		104.92	0
		105.06	0
		105.2	0
		105.34	0
		105.48	0
		105.62	0
		105.76	0
		105.9	0
		106.04	0
		106.18	0
		106.32	0
		106.46	0
		106.6	0
		106.74	0
		106.88	0
		107.02	0
		107.16	0
		107.3	0
		107.44	0
		107.58	0
		107.72	0
		107.86	0
		108	0
		108.14	0
		108.28	0
		108.42	0
		108.56	0
		108.7	0
		108.84	0
		108.98	0
		109.12	0
		109.26	0
		109.4	0
		109.54	0
		109.68	0
		109.82	0
		109.96	0
		110.1	0
		110.24	0
		110.38	0
		110.52	0
		110.66	0
		110.8	0
		110.94	0
		111.08	0
		111.22	0
		111.36	0
		111.5	0
		111.64	0
		111.78	0
		111.92	0
		112.06	0
		112.2	0
		112.34	0
		112.48	0
		112.62	0
		112.76	0
		112.9	0
		113.04	0
		113.18	0
		113.32	0
		113.46	0
		113.6	0
		113.74	0
		113.88	0
		114.02	0
		114.16	0
		114.3	0
		114.44	0
		114.58	0
		114.72	0
		114.86	0
		115	0
		115.14	0
		115.28	0
		115.42	0
		115.56	0
		115.7	0
		115.84	0
		115.98	0
		116.12	0
		116.26	0
		116.4	0
		116.54	0
		116.68	0
		116.82	0
		116.96	0
		117.1	0
		117.24	0
		117.38	0
		117.52	0
		117.66	0
		117.8	0
		117.94	0
		118.08	0
		118.22	0
		118.36	0
		118.5	0
		118.64	0
		118.78	0
		118.92	0
		119.06	0
		119.2	0
		119.34	0
		119.48	0
		119.62	0
		119.76	0
		119.9	0
		120.04	0
		120.18	0
		120.32	0
		120.46	0
		120.6	0
		120.74	0
		120.88	0
		121.02	0
		121.16	0
		121.3	0
		121.44	0
		121.58	0
		121.72	0
		121.86	0
		122	0
		122.14	0
		122.28	0
		122.42	0
		122.56	0
		122.7	0
		122.84	0
		122.98	0
		123.12	0
		123.26	0
		123.4	0
		123.54	0
		123.68	0
		123.82	0
		123.96	0
		124.1	0
		124.24	0
		124.38	0
		124.52	0
		124.66	0
		124.8	0
		124.94	0
		125.08	0
		125.22	0
		125.36	0
		125.5	0
		125.64	0
		125.78	0
		125.92	0
		126.06	0
		126.2	0
		126.34	0
		126.48	0
		126.62	0
		126.76	0
		126.9	0
		127.04	0
		127.18	0
		127.32	0
		127.46	0
		127.6	0
		127.74	0
		127.88	0
		128.02	0
		128.16	0
		128.3	0
		128.44	0
		128.58	0
		128.72	0
		128.86	0
		129	0
		129.14	0
		129.28	0
		129.42	0
		129.56	0
		129.7	0
		129.84	0
		129.98	0
		130.12	0
		130.26	0
		130.4	0
		130.54	0
		130.68	0
		130.82	0
		130.96	0
		131.1	0
		131.24	0
		131.38	0
		131.52	0
		131.66	0
		131.8	0
		131.94	0
		132.08	0
		132.22	0
		132.36	0
		132.5	0
		132.64	0
		132.78	0
		132.92	0
		133.06	0
		133.2	0
		133.34	0
		133.48	0
		133.62	0
		133.76	0
		133.9	0
		134.04	0
		134.18	0
		134.32	0
		134.46	0
		134.6	0
		134.74	0
		134.88	0
		135.02	0
		135.16	0
		135.3	0
		135.44	0
		135.58	0
		135.72	0
		135.86	0
		136	0
		136.14	0
		136.28	0
		136.42	0
		136.56	0
		136.7	0
		136.84	0
		136.98	0
		137.12	0
		137.26	0
		137.4	0
		137.54	0
		137.68	0
		137.82	0
		137.96	0
		138.1	0
		138.24	0
		138.38	0
		138.52	0
		138.66	0
		138.8	0
		138.94	0
		139.08	0
		139.22	0
		139.36	0
		139.5	0
		139.64	0
		139.78	0
		139.92	0
		140.06	0
		140.2	0
		140.34	0
		140.48	0
		140.62	0
		140.76	0
		140.9	0
		141.04	0
		141.18	0
		141.32	0
		141.46	0
		141.6	0
		141.74	0
		141.88	0
		142.02	0
		142.16	0
		142.3	0
		142.44	0
		142.58	0
		142.72	0
		142.86	0
		143	0
		143.14	0
		143.28	0
		143.42	0
		143.56	0
		143.7	0
		143.84	0
		143.98	0
		144.12	0
		144.26	0
		144.4	0
		144.54	0
		144.68	0
		144.82	0
		144.96	0
		145.1	0
		145.24	0
		145.38	0
		145.52	0
		145.66	0
		145.8	0
		145.94	0
		146.08	0
		146.22	0
		146.36	0
		146.5	0
		146.64	0
		146.78	0
		146.92	0
		147.06	0
		147.2	0
		147.34	0
		147.48	0
		147.62	0
		147.76	0
		147.9	0
		148.04	0
		148.18	0
		148.32	0
		148.46	0
		148.6	0
		148.74	0
		148.88	0
		149.02	0
		149.16	0
		149.3	0
		149.44	0
		149.58	0
		149.72	0
		149.86	0
		150	0
		150.14	0
		150.28	0
		150.42	0
		150.56	0
		150.7	0
		150.84	0
		150.98	0
		151.12	0
		151.26	0
		151.4	0
		151.54	0
		151.68	0
		151.82	0
		151.96	0
		152.1	0
		152.24	0
		152.38	0
		152.52	0
		152.66	0
		152.8	0
		152.94	0
		153.08	0
		153.22	0
		153.36	0
		153.5	0
		153.64	0
		153.78	0
		153.92	0
		154.06	0
		154.2	0
		154.34	0
		154.48	0
		154.62	0
		154.76	0
		154.9	0
		155.04	0
		155.18	0
		155.32	0
		155.46	0
		155.6	0
		155.74	0
		155.88	0
		156.02	0
		156.16	0
		156.3	0
		156.44	0
		156.58	0
		156.72	0
		156.86	0
		157	0
		157.14	0
		157.28	0
		157.42	0
		157.56	0
		157.7	0
		157.84	0
		157.98	0
		158.12	0
		158.26	0
		158.4	0
		158.54	0
		158.68	0
		158.82	0
		158.96	0
		159.1	0
		159.24	0
		159.38	0
		159.52	0
		159.66	0
		159.8	0
		159.94	0
		160.08	0
		160.22	0
		160.36	0
		160.5	0
		160.64	0
		160.78	0
		160.92	0
		161.06	0
		161.2	0
		161.34	0
		161.48	0
		161.62	0
		161.76	0
		161.9	0
		162.04	0
		162.18	0
		162.32	0
		162.46	0
		162.6	0
		162.74	0
		162.88	0
		163.02	0
		163.16	0
		163.3	0
		163.44	0
		163.58	0
		163.72	0
		163.86	0
		164	0
		164.14	0
		164.28	0
		164.42	0
		164.56	0
		164.7	0
		164.84	0
		164.98	0
		165.12	0
		165.26	0
		165.4	0
		165.54	0
		165.68	0
		165.82	0
		165.96	0
		166.1	0
		166.24	0
		166.38	0
		166.52	0
		166.66	0
		166.8	0
		166.94	0
		167.08	0
		167.22	0
		167.36	0
		167.5	0
		167.64	0
		167.78	0
		167.92	0
		168.06	0
		168.2	0
		168.34	0
		168.48	0
		168.62	0
		168.76	0
		168.9	0
		169.04	0
		169.18	0
		169.32	0
		169.46	0
		169.6	0
		169.74	0
		169.88	0
		170.02	0
		170.16	0
		170.3	0
		170.44	0
		170.58	0
		170.72	0
		170.86	0
		171	0
		171.14	0
		171.28	0
		171.42	0
		171.56	0
		171.7	0
		171.84	0
		171.98	0
		172.12	0
		172.26	0
		172.4	0
		172.54	0
		172.68	0
		172.82	0
		172.96	0
		173.1	0
		173.24	1.4538e-08
		173.38	1.90598e-08
		173.52	2.49098e-08
		173.66	3.24533e-08
		173.8	4.2149e-08
		173.94	5.457e-08
		174.08	7.043e-08
		174.22	9.0615e-08
		174.36	1.1622e-07
		174.5	1.48593e-07
		174.64	1.89389e-07
		174.78	2.4063e-07
		174.92	3.04777e-07
		175.06	3.84815e-07
		175.2	4.84352e-07
		175.34	6.07726e-07
		175.48	7.60138e-07
		175.62	9.47796e-07
		175.76	1.17808e-06
		175.9	1.45974e-06
		176.04	1.80307e-06
		176.18	2.22017e-06
		176.32	2.72521e-06
		176.46	3.33465e-06
		176.6	4.06761e-06
		176.74	4.94614e-06
		176.88	5.99559e-06
		177.02	7.24495e-06
		177.16	8.72723e-06
		177.3	1.04799e-05
		177.44	1.25451e-05
		177.58	1.49702e-05
		177.72	1.78083e-05
		177.86	2.11181e-05
		178	2.49645e-05
		178.14	2.94192e-05
		178.28	3.45602e-05
		178.42	4.04726e-05
		178.56	4.72479e-05
		178.7	5.49848e-05
		178.84	6.37882e-05
		178.98	7.37694e-05
		179.12	8.50453e-05
		179.26	9.77378e-05
		179.4	0.000111973
		179.54	0.000127879
		179.68	0.000145588
		179.82	0.000165231
		179.96	0.000186936
		180.1	0.000210831
		180.24	0.000237035
		180.38	0.000265662
		180.52	0.000296826
		180.66	0.000330594
		180.8	0.00036705
		180.94	0.000406251
		181.08	0.00044823
		181.22	0.000492999
		181.36	0.000540542
		181.5	0.000590827
		181.64	0.000643755
		181.78	0.000699229
		181.92	0.000757105
		182.06	0.000817205
		182.2	0.000879316
		182.34	0.000943185
		182.48	0.00100853
		182.62	0.00107503
		182.76	0.00114233
		182.9	0.00121004
		183.04	0.00127777
		183.18	0.00134506
		183.32	0.00141146
		183.46	0.00147652
		183.6	0.00153975
		183.74	0.00160068
		183.88	0.00165883
		184.02	0.00171374
		184.16	0.00176496
		184.3	0.00181208
		184.44	0.00185468
		184.58	0.00189242
		184.72	0.00192498
		184.86	0.0019521
		185	0.00197357
		185.14	0.00198923
		185.28	0.00199901
		185.42	0.00200287
		185.56	0.00200087
		185.7	0.00199312
		185.84	0.00197983
		185.98	0.00196125
		186.12	0.00193772
		186.26	0.00190966
		186.4	0.00187754
		186.54	0.00184189
		186.68	0.00180334
		186.82	0.00176253
		186.96	0.00172018
		187.1	0.00167704
		187.24	0.0016339
		187.38	0.00159157
		187.52	0.0015509
		187.66	0.00151272
		187.8	0.00147787
		187.94	0.00144718
		188.08	0.00142144
		188.22	0.0014014
		188.36	0.00138777
		188.5	0.00138118
		188.64	0.00138217
		188.78	0.00139118
		188.92	0.00140857
		189.06	0.00143454
		189.2	0.00146919
		189.34	0.00151246
		189.48	0.00156414
		189.62	0.00162387
		189.76	0.00169114
		189.9	0.00176528
		190.04	0.00184548
		190.18	0.0019308
		190.32	0.00202015
		190.46	0.00211235
		190.6	0.00220614
		190.74	0.00230018
		190.88	0.0023931
		191.02	0.00248352
		191.16	0.00257009
		191.3	0.00265148
		191.44	0.00272644
		191.58	0.00279385
		191.72	0.00285272
		191.86	0.0029022
		192	0.00294162
		192.14	0.00297051
		192.28	0.00298858
		192.42	0.00299575
		192.56	0.00299216
		192.7	0.00297813
		192.84	0.00295417
		192.98	0.00292096
		193.12	0.00287936
		193.26	0.00283033
		193.4	0.00277493
		193.54	0.00271432
		193.68	0.00264969
		193.82	0.00258228
		193.96	0.00251327
		194.1	0.00244385
		194.24	0.00237514
		194.38	0.0023082
		194.52	0.00224397
		194.66	0.00218329
		194.8	0.00212691
		194.94	0.00207543
		195.08	0.00202931
		195.22	0.00198893
		195.36	0.00195452
		195.5	0.00192621
		195.64	0.00190403
		195.78	0.00188791
		195.92	0.00187769
		196.06	0.0018732
		196.2	0.00187411
		196.34	0.00188014
		196.48	0.00189096
		196.62	0.00190621
		196.76	0.00192556
		196.9	0.00194864
		197.04	0.00197513
		197.18	0.00200472
		197.32	0.00203712
		197.46	0.00207211
		197.6	0.00210948
		197.74	0.00214904
		197.88	0.0021907
		198.02	0.00223439
		198.16	0.00228007
		198.3	0.00232773
		198.44	0.00237744
		198.58	0.00242931
		198.72	0.00248348
		198.86	0.00254011
		199	0.00259941
		199.14	0.00266163
		199.28	0.00272704
		199.42	0.00279595
		199.56	0.0028687
		199.7	0.00294568
		199.84	0.00302721
		199.98	0.00311371
		200.12	0.00320562
		200.26	0.00330338
		200.4	0.00340745
		200.54	0.00351827
		200.68	0.00363634
		200.82	0.00376215
		200.96	0.00389617
		201.1	0.00403889
		201.24	0.00419079
		201.38	0.00435234
		201.52	0.00452398
		201.66	0.0047061
		201.8	0.00489909
		201.94	0.00510323
		202.08	0.00531881
		202.22	0.00554597
		202.36	0.0057848
		202.5	0.00603524
		202.64	0.00629717
		202.78	0.00657026
		202.92	0.0068541
		203.06	0.00714809
		203.2	0.00745148
		203.34	0.00776337
		203.48	0.00808267
		203.62	0.00840814
		203.76	0.00873841
		203.9	0.00907198
		204.04	0.00940716
		204.18	0.00974229
		204.32	0.0100756
		204.46	0.0104052
		204.6	0.0107294
		204.74	0.0110465
		204.88	0.0113547
		205.02	0.0116527
		205.16	0.0119391
		205.3	0.0122128
		205.44	0.0124728
		205.58	0.0127186
		205.72	0.0129498
		205.86	0.0131664
		206	0.0133687
		206.14	0.0135571
		206.28	0.0137325
		206.42	0.013896
		206.56	0.0140489
		206.7	0.0141927
		206.84	0.014329
		206.98	0.0144597
		207.12	0.0145865
		207.26	0.0147114
		207.4	0.0148363
		207.54	0.014963
		207.68	0.0150933
		207.82	0.0152286
		207.96	0.0153707
		208.1	0.0155206
		208.24	0.0156797
		208.38	0.0158488
		208.52	0.0160288
		208.66	0.0162201
		208.8	0.0164233
		208.94	0.0166385
		209.08	0.0168659
		209.22	0.0171055
		209.36	0.017357
		209.5	0.0176204
		209.64	0.0178953
		209.78	0.0181813
		209.92	0.0184781
		210.06	0.0187852
		210.2	0.0191021
		210.34	0.0194284
		210.48	0.0197636
		210.62	0.0201072
		210.76	0.0204586
		210.9	0.0208173
		211.04	0.0211826
		211.18	0.021554
		211.32	0.0219307
		211.46	0.0223119
		211.6	0.0226969
		211.74	0.0230848
		211.88	0.0234745
		212.02	0.0238651
		212.16	0.0242554
		212.3	0.0246444
		212.44	0.0250307
		212.58	0.0254132
		212.72	0.0257906
		212.86	0.0261616
		213	0.0265251
		213.14	0.0268798
		213.28	0.0272246
		213.42	0.0275586
		213.56	0.0278808
		213.7	0.0281904
		213.84	0.0284868
		213.98	0.0287694
		214.12	0.029038
		214.26	0.0292922
		214.4	0.0295321
		214.54	0.0297576
		214.68	0.0299689
		214.82	0.0301663
		214.96	0.0303501
		215.1	0.0305206
		215.24	0.0306783
		215.38	0.0308236
		215.52	0.0309567
		215.66	0.031078
		215.8	0.0311878
		215.94	0.0312863
		216.08	0.0313737
		216.22	0.0314499
		216.36	0.0315151
		216.5	0.0315691
		216.64	0.0316119
		216.78	0.0316433
		216.92	0.0316633
		217.06	0.0316718
		217.2	0.0316686
		217.34	0.0316537
		217.48	0.0316271
		217.62	0.031589
		217.76	0.0315395
		217.9	0.0314787
		218.04	0.0314071
		218.18	0.0313248
		218.32	0.0312324
		218.46	0.0311302
		218.6	0.0310186
		218.74	0.0308981
		218.88	0.0307691
		219.02	0.030632
		219.16	0.030487
		219.3	0.0303344
		219.44	0.0301744
		219.58	0.0300072
		219.72	0.0298327
		219.86	0.0296511
		220	0.0294622
		220.14	0.0292659
		220.28	0.0290621
		220.42	0.0288507
		220.56	0.0286314
		220.7	0.0284043
		220.84	0.0281692
		220.98	0.0279261
		221.12	0.0276751
		221.26	0.0274161
		221.4	0.0271495
		221.54	0.0268754
		221.68	0.0265942
		221.82	0.0263064
		221.96	0.0260125
		222.1	0.025713
		222.24	0.0254087
		222.38	0.0251001
		222.52	0.024788
		222.66	0.0244733
		222.8	0.0241567
		222.94	0.0238389
		223.08	0.0235209
		223.22	0.0232033
		223.36	0.0228869
		223.5	0.0225725
		223.64	0.0222606
		223.78	0.0219519
		223.92	0.0216471
		224.06	0.0213465
		224.2	0.0210507
		224.34	0.02076
		224.48	0.0204747
		224.62	0.0201951
		224.76	0.0199214
		224.9	0.0196536
		225.04	0.0193919
		225.18	0.0191362
		225.32	0.0188865
		225.46	0.0186427
		225.6	0.0184046
		225.74	0.018172
		225.88	0.0179446
		226.02	0.0177223
		226.16	0.0175047
		226.3	0.0172915
		226.44	0.0170824
		226.58	0.0168771
		226.72	0.0166753
		226.86	0.0164766
		227	0.0162808
		227.14	0.0160876
		227.28	0.0158968
		227.42	0.0157081
		227.56	0.0155213
		227.7	0.0153363
		227.84	0.0151531
		227.98	0.0149714
		228.12	0.0147912
		228.26	0.0146127
		228.4	0.0144356
		228.54	0.0142602
		228.68	0.0140865
		228.82	0.0139144
		228.96	0.0137443
		229.1	0.013576
		229.24	0.0134098
		229.38	0.0132457
		229.52	0.0130839
		229.66	0.0129243
		229.8	0.0127669
		229.94	0.012612
		230.08	0.0124593
		230.22	0.0123089
		230.36	0.0121608
		230.5	0.0120147
		230.64	0.0118707
		230.78	0.0117285
		230.92	0.0115879
		231.06	0.0114489
		231.2	0.0113111
		231.34	0.0111745
		231.48	0.0110387
		231.62	0.0109035
		231.76	0.0107689
		231.9	0.0106345
		232.04	0.0105002
		232.18	0.0103659
		232.32	0.0102316
		232.46	0.0100971
		232.6	0.00996253
		232.74	0.00982781
		232.88	0.00969309
		233.02	0.00955848
		233.16	0.0094242
		233.3	0.00929046
		233.44	0.00915756
		233.58	0.00902584
		233.72	0.00889566
		233.86	0.00876744
		234	0.00864162
		234.14	0.00851867
		234.28	0.0083991
		234.42	0.00828339
		234.56	0.00817207
		234.7	0.00806565
		234.84	0.00796462
		234.98	0.00786947
		235.12	0.00778066
		235.26	0.00769865
		235.4	0.00762382
		235.54	0.0075565
		235.68	0.00749705
		235.82	0.0074457
		235.96	0.00740266
		236.1	0.00736806
		236.24	0.00734199
		236.38	0.00732447
		236.52	0.00731541
		236.66	0.00731476
		236.8	0.00732232
		236.94	0.00733785
		237.08	0.00736107
		237.22	0.00739163
		237.36	0.00742913
		237.5	0.00747313
		237.64	0.00752316
		237.78	0.00757867
		237.92	0.00763918
		238.06	0.0077041
		238.2	0.00777285
		238.34	0.00784485
		238.48	0.0079195
		238.62	0.00799622
		238.76	0.00807443
		238.9	0.0081536
		239.04	0.00823319
		239.18	0.00831268
		239.32	0.00839161
		239.46	0.00846955
		239.6	0.00854608
		239.74	0.00862083
		239.88	0.00869349
		240.02	0.00876378
		240.16	0.00883146
		240.3	0.00889635
		240.44	0.00895827
		240.58	0.00901713
		240.72	0.00907285
		240.86	0.00912537
		241	0.00917469
		241.14	0.00922082
		241.28	0.00926378
		241.42	0.00930365
		241.56	0.00934046
		241.7	0.00937432
		241.84	0.0094053
		241.98	0.00943348
		242.12	0.00945895
		242.26	0.00948177
		242.4	0.00950203
		242.54	0.00951979
		242.68	0.00953508
		242.82	0.00954796
		242.96	0.00955843
		243.1	0.00956651
		243.24	0.00957219
		243.38	0.00957544
		243.52	0.00957625
		243.66	0.00957456
		243.8	0.00957033
		243.94	0.0095635
		244.08	0.00955401
		244.22	0.0095418
		244.36	0.00952683
		244.5	0.00950903
		244.64	0.00948837
		244.78	0.00946484
		244.92	0.00943841
		245.06	0.0094091
		245.2	0.00937694
		245.34	0.00934198
		245.48	0.00930431
		245.62	0.00926401
		245.76	0.00922124
		245.9	0.00917613
		246.04	0.00912889
		246.18	0.00907972
		246.32	0.00902885
		246.46	0.00897656
		246.6	0.00892311
		246.74	0.00886882
		246.88	0.00881398
		247.02	0.00875896
		247.16	0.00870406
		247.3	0.00864967
		247.44	0.00859611
		247.58	0.00854374
		247.72	0.00849288
		247.86	0.00844386
		248	0.00839701
		248.14	0.0083526
		248.28	0.00831094
		248.42	0.00827224
		248.56	0.00823673
		248.7	0.00820461
		248.84	0.00817601
		248.98	0.00815105
		249.12	0.00812979
		249.26	0.00811227
		249.4	0.00809848
		249.54	0.00808835
		249.68	0.00808179
		249.82	0.00807865
		249.96	0.00807877
		250.1	0.00808189
		250.24	0.00808778
		250.38	0.00809611
		250.52	0.00810655
		250.66	0.00811873
		250.8	0.00813224
		250.94	0.00814667
		251.08	0.00816156
		251.22	0.00817646
		251.36	0.00819087
		251.5	0.00820433
		251.64	0.00821633
		251.78	0.00822639
		251.92	0.00823402
		252.06	0.00823874
		252.2	0.00824009
		252.34	0.00823762
		252.48	0.00823092
		252.62	0.00821957
		252.76	0.00820322
		252.9	0.00818153
		253.04	0.0081542
		253.18	0.00812095
		253.32	0.00808157
		253.46	0.00803589
		253.6	0.00798376
		253.74	0.00792507
		253.88	0.00785979
		254.02	0.00778789
		254.16	0.00770942
		254.3	0.00762444
		254.44	0.00753308
		254.58	0.00743548
		254.72	0.00733184
		254.86	0.00722239
		255	0.00710738
		255.14	0.00698709
		255.28	0.00686185
		255.42	0.00673198
		255.56	0.00659784
		255.7	0.00645979
		255.84	0.00631823
		255.98	0.00617352
		256.12	0.0060261
		256.26	0.00587634
		256.4	0.00572464
		256.54	0.00557142
		256.68	0.00541706
		256.82	0.00526193
		256.96	0.00510642
		257.1	0.00495087
		257.24	0.00479564
		257.38	0.00464106
		257.52	0.00448743
		257.66	0.00433505
		257.8	0.00418419
		257.94	0.0040351
		258.08	0.00388803
		258.22	0.00374319
		258.36	0.00360077
		258.5	0.00346094
		258.64	0.00332385
		258.78	0.00318965
		258.92	0.00305846
		259.06	0.00293037
		259.2	0.00280547
		259.34	0.00268382
		259.48	0.00256548
		259.62	0.00245048
		259.76	0.00233886
		259.9	0.00223062
		260.04	0.00212578
		260.18	0.00202432
		260.32	0.00192622
		260.46	0.00183148
		260.6	0.00174005
		260.74	0.00165191
		260.88	0.001567
		261.02	0.00148529
		261.16	0.00140671
		261.3	0.00133122
		261.44	0.00125876
		261.58	0.00118926
		261.72	0.00112266
		261.86	0.00105889
		262	0.000997894
		262.14	0.000939597
		262.28	0.00088393
		262.42	0.000830823
		262.56	0.000780193
		262.7	0.000731994
		262.84	0.00068614
		262.98	0.000642559
		263.12	0.000601178
		263.26	0.000561927
		263.4	0.000524733
		263.54	0.000489524
		263.68	0.00045623
		263.82	0.000424781
		263.96	0.000395105
		264.1	0.000367133
		264.24	0.000340798
		264.38	0.000316031
		264.52	0.000292765
		264.66	0.000270934
		264.8	0.000250474
		264.94	0.000231321
		265.08	0.000213413
		265.22	0.000196688
		265.36	0.000181088
		265.5	0.000166555
		265.64	0.000153032
		265.78	0.000140463
		265.92	0.000128797
		266.06	0.000117981
		266.2	0.000107966
		266.34	9.87043e-05
		266.48	9.01491e-05
		266.62	8.22566e-05
		266.76	7.49842e-05
		266.9	6.82915e-05
		267.04	6.21396e-05
		267.18	5.64917e-05
		267.32	5.13127e-05
		267.46	4.65584e-05
		267.6	4.22213e-05
		267.74	3.82579e-05
		267.88	3.46403e-05
		268.02	3.1342e-05
		268.16	2.83381e-05
		268.3	2.56055e-05
		268.44	2.31222e-05
		268.58	2.08679e-05
		268.72	1.88234e-05
		268.86	1.69599e-05
		269	1.52848e-05
		269.14	1.37599e-05
		269.28	1.23809e-05
		269.42	1.11482e-05
		269.56	1.00362e-05
		269.7	9.03375e-06
		269.84	8.13071e-06
		269.98	7.31776e-06
		270.12	6.58637e-06
		270.26	5.92872e-06
		270.4	5.33767e-06
		270.54	4.8067e-06
		270.68	4.32987e-06
		270.82	3.9018e-06
		270.96	3.51757e-06
		271.1	3.17275e-06
		271.24	2.86332e-06
		271.38	2.58564e-06
		271.52	2.33644e-06
		271.66	2.11275e-06
		271.8	1.91191e-06
		271.94	1.73153e-06
		272.08	1.56945e-06
		272.22	1.42376e-06
		272.36	1.29271e-06
		272.5	1.16272e-06
		272.64	1.05822e-06
		272.78	9.63967e-07
		272.92	8.78869e-07
		273.06	8.01972e-07
		273.2	7.32421e-07
		273.34	6.69453e-07
		273.48	6.0047e-07
		273.62	5.38164e-07
		273.76	4.94214e-07
		273.9	4.54131e-07
		274.04	4.17538e-07
		274.18	3.84096e-07
		274.32	3.53504e-07
		274.46	3.25492e-07
		274.6	2.99818e-07
		274.74	2.76267e-07
		274.88	2.54645e-07
		275.02	2.34778e-07
		275.16	2.0476e-07
		275.3	1.89919e-07
		275.44	1.76093e-07
		275.58	1.63216e-07
		275.72	1.51228e-07
		275.86	1.40072e-07
		276	1.29694e-07
		276.14	1.20043e-07
		276.28	1.11071e-07
		276.42	1.02734e-07
		276.56	9.49896e-08
		276.7	8.77984e-08
		276.84	8.11234e-08
		276.98	7.49298e-08
		277.12	6.91849e-08
		277.26	6.38582e-08
		277.4	5.89211e-08
		277.54	5.43468e-08
		277.68	5.01101e-08
		277.82	4.61876e-08
		277.96	4.25573e-08
		278.1	3.91987e-08
		278.24	3.60926e-08
		278.38	3.3221e-08
		278.52	3.05672e-08
		278.66	2.81157e-08
		278.8	2.58517e-08
		278.94	2.37618e-08
		279.08	2.18332e-08
		279.22	2.00541e-08
		279.36	1.84136e-08
		279.5	1.69014e-08
		279.64	1.5508e-08
		279.78	1.42245e-08
		279.92	1.30427e-08
		280.06	1.34034e-08
		280.2	1.51082e-08
		280.34	1.70188e-08
		280.48	1.91586e-08
		280.62	2.15535e-08
		280.76	2.42321e-08
		280.9	2.72258e-08
		281.04	3.05696e-08
		281.18	3.43019e-08
		281.32	3.84649e-08
		281.46	4.31052e-08
		281.6	4.8274e-08
		281.74	5.40276e-08
		281.88	6.04277e-08
		282.02	8.04934e-08
		282.16	9.00467e-08
		282.3	1.0067e-07
		282.44	1.12474e-07
		282.58	1.25583e-07
		282.72	1.40131e-07
		282.86	1.56265e-07
		283	1.74145e-07
		283.14	1.93947e-07
		283.28	2.15865e-07
		283.42	2.40106e-07
		283.56	2.669e-07
		283.7	2.96495e-07
		283.84	3.29163e-07
		283.98	3.65198e-07
		284.12	4.04921e-07
		284.26	4.48679e-07
		284.4	4.96851e-07
		284.54	5.49845e-07
		284.68	6.08104e-07
		284.82	6.7211e-07
		284.96	7.42382e-07
		285.1	8.1948e-07
		285.24	9.04011e-07
		285.38	9.96629e-07
		285.52	1.09804e-06
		285.66	1.209e-06
		285.8	1.33033e-06
		285.94	1.46291e-06
		286.08	1.60768e-06
		286.22	1.76565e-06
		286.36	1.93792e-06
		286.5	2.12565e-06
		286.64	2.33009e-06
		286.78	2.55258e-06
		286.92	2.79453e-06
		287.06	3.05748e-06
		287.2	3.34305e-06
		287.34	3.65298e-06
		287.48	3.98912e-06
		287.62	4.35342e-06
		287.76	4.74799e-06
		287.9	5.17504e-06
		288.04	5.63694e-06
		288.18	6.13617e-06
		288.32	6.67539e-06
		288.46	7.2574e-06
		288.6	7.88516e-06
		288.74	8.5618e-06
		288.88	9.29062e-06
		289.02	1.00751e-05
		289.16	1.09189e-05
		289.3	1.18259e-05
		289.44	1.28002e-05
		289.58	1.3846e-05
		289.72	1.49677e-05
		289.86	1.61701e-05
		290	1.7458e-05
		290.14	1.88366e-05
		290.28	2.03112e-05
		290.42	2.18874e-05
		290.56	2.35711e-05
		290.7	2.53682e-05
		290.84	2.72851e-05
		290.98	2.93284e-05
		291.12	3.15047e-05
		291.26	3.38212e-05
		291.4	3.6285e-05
		291.54	3.89038e-05
		291.68	4.16853e-05
		291.82	4.46374e-05
		291.96	4.77685e-05
		292.1	5.1087e-05
		292.24	5.46015e-05
		292.38	5.8321e-05
		292.52	6.22546e-05
		292.66	6.64115e-05
		292.8	7.08014e-05
		292.94	7.54339e-05
		293.08	8.03189e-05
		293.22	8.54662e-05
		293.36	9.08861e-05
		293.5	9.65889e-05
		293.64	0.000102585
		293.78	0.000108884
		293.92	0.000115498
		294.06	0.000122436
		294.2	0.000129709
		294.34	0.000137327
		294.48	0.000145302
		294.62	0.000153642
		294.76	0.00016236
		294.9	0.000171464
		295.04	0.000180964
		295.18	0.00019087
		295.32	0.000201193
		295.46	0.000211939
		295.6	0.00022312
		295.74	0.000234743
		295.88	0.000246815
		296.02	0.000259345
		296.16	0.000272341
		296.3	0.000285807
		296.44	0.000299763
		296.58	0.000314192
		296.72	0.000329108
		296.86	0.000344516
		297	0.000360418
		297.14	0.000376818
		297.28	0.000393717
		297.42	0.000411115
		297.56	0.000429013
		297.7	0.000447409
		297.84	0.000466302
		297.98	0.000485688
		298.12	0.000505562
		298.26	0.000525933
		298.4	0.00054677
		298.54	0.000568077
		298.68	0.000589844
		298.82	0.000612063
		298.96	0.000634722
		299.1	0.000657808
		299.24	0.000681308
		299.38	0.000705207
		299.52	0.000729489
		299.66	0.000754137
		299.8	0.000779132
		299.94	0.000804454
		300.08	0.000830083
		300.22	0.000855996
		300.36	0.000882169
		300.5	0.000908579
		300.64	0.0009352
		300.78	0.000962005
		300.92	0.000988979
		301.06	0.00101607
		301.2	0.00104326
		301.34	0.00107052
		301.48	0.00109782
		301.62	0.00112512
		301.76	0.0011524
		301.9	0.00117962
		302.04	0.00120675
		302.18	0.00123375
		302.32	0.00126059
		302.46	0.00128724
		302.6	0.00131366
		302.74	0.00133983
		302.88	0.0013657
		303.02	0.00139123
		303.16	0.00141643
		303.3	0.00144121
		303.44	0.00146558
		303.58	0.00148948
		303.72	0.00151291
		303.86	0.00153581
		304	0.00155818
		304.14	0.00157998
		304.28	0.00160118
		304.42	0.00162177
		304.56	0.00164172
		304.7	0.00166102
		304.84	0.00167964
		304.98	0.00169756
		305.12	0.00171479
		305.26	0.0017313
		305.4	0.00174708
		305.54	0.00176213
		305.68	0.00177645
		305.82	0.00179003
		305.96	0.00180288
		306.1	0.00181499
		306.24	0.00182639
		306.38	0.00183707
		306.52	0.00184705
		306.66	0.00185635
		306.8	0.00186498
		306.94	0.00187298
		307.08	0.00188037
		307.22	0.00188716
		307.36	0.0018934
		307.5	0.00189912
		307.64	0.00190436
		307.78	0.00190915
		307.92	0.00191355
		308.06	0.0019176
		308.2	0.00192134
		308.34	0.00192483
		308.48	0.00192815
		308.62	0.00193131
		308.76	0.0019344
		308.9	0.00193746
		309.04	0.00194058
		309.18	0.00194381
		309.32	0.00194721
		309.46	0.00195087
		309.6	0.00195484
		309.74	0.00195921
		309.88	0.00196403
		310.02	0.00196939
		310.16	0.00197536
		310.3	0.00198201
		310.44	0.00198941
		310.58	0.00199764
		310.72	0.00200677
		310.86	0.00201687
		311	0.002028
		311.14	0.00204025
		311.28	0.00205368
		311.42	0.00206834
		311.56	0.00208431
		311.7	0.00210164
		311.84	0.0021204
		311.98	0.00214063
		312.12	0.00216239
		312.26	0.00218572
		312.4	0.00221066
		312.54	0.00223727
		312.68	0.00226556
		312.82	0.00229558
		312.96	0.00232733
		313.1	0.00236086
		313.24	0.00239617
		313.38	0.00243326
		313.52	0.00247215
		313.66	0.00251283
		313.8	0.0025553
		313.94	0.00259954
		314.08	0.00264553
		314.22	0.00269324
		314.36	0.00274266
		314.5	0.00279373
		314.64	0.00284643
		314.78	0.0029007
		314.92	0.00295647
		315.06	0.00301371
		315.2	0.00307234
		315.34	0.00313228
		315.48	0.00319348
		315.62	0.00325585
		315.76	0.0033193
		315.9	0.00338375
		316.04	0.00344911
		316.18	0.00351529
		316.32	0.00358218
		316.46	0.0036497
		316.6	0.00371773
		316.74	0.00378619
		316.88	0.00385495
		317.02	0.00392393
		317.16	0.00399301
		317.3	0.00406209
		317.44	0.00413108
		317.58	0.00419987
		317.72	0.00426836
		317.86	0.00433645
		318	0.00440406
		318.14	0.0044711
		318.28	0.00453747
		318.42	0.0046031
		318.56	0.00466791
		318.7	0.00473184
		318.84	0.00479481
		318.98	0.00485678
		319.12	0.00491769
		319.26	0.00497749
		319.4	0.00503615
		319.54	0.00509364
		319.68	0.00514994
		319.82	0.00520504
		319.96	0.00525893
		320.1	0.0053116
		320.24	0.00536308
		320.38	0.00541338
		320.52	0.00546252
		320.66	0.00551053
		320.8	0.00555746
		320.94	0.00560334
		321.08	0.00564823
		321.22	0.00569218
		321.36	0.00573524
		321.5	0.00577748
		321.64	0.00581896
		321.78	0.00585974
		321.92	0.00589987
		322.06	0.00593942
		322.2	0.00597844
		322.34	0.00601697
		322.48	0.00605506
		322.62	0.00609273
		322.76	0.00613002
		322.9	0.00616691
		323.04	0.00620342
		323.18	0.0062395
		323.32	0.00627514
		323.46	0.00631026
		323.6	0.0063448
		323.74	0.00637865
		323.88	0.0064117
		324.02	0.0064438
		324.16	0.00647479
		324.3	0.0065045
		324.44	0.00653271
		324.58	0.00655921
		324.72	0.00658374
		324.86	0.00660604
		325	0.00662585
		325.14	0.00664286
		325.28	0.00665679
		325.42	0.00666732
		325.56	0.00667414
		325.7	0.00667694
		325.84	0.00667541
		325.98	0.00666926
		326.12	0.00665818
		326.26	0.0066419
		326.4	0.00662017
		326.54	0.00659276
		326.68	0.00655945
		326.82	0.00652008
		326.96	0.00647449
		327.1	0.00642259
		327.24	0.0063643
		327.38	0.0062996
		327.52	0.0062285
		327.66	0.00615106
		327.8	0.00606738
		327.94	0.00597762
		328.08	0.00588195
		328.22	0.00578061
		328.36	0.00567387
		328.5	0.00556204
		328.64	0.00544546
		328.78	0.0053245
		328.92	0.00519957
		329.06	0.00507108
		329.2	0.00493949
		329.34	0.00480525
		329.48	0.00466884
		329.62	0.00453074
		329.76	0.00439141
		329.9	0.00425135
		330.04	0.00411101
		330.18	0.00397086
		330.32	0.00383133
		330.46	0.00369286
		330.6	0.00355585
		330.74	0.00342066
		330.88	0.00328767
		331.02	0.00315719
		331.16	0.0030295
		331.3	0.00290488
		331.44	0.00278356
		331.58	0.00266573
		331.72	0.00255155
		331.86	0.00244117
		332	0.00233469
		332.14	0.00223216
		332.28	0.00213366
		332.42	0.00203919
		332.56	0.00194876
		332.7	0.00186232
		332.84	0.00177984
		332.98	0.00170125
		333.12	0.00162645
		333.26	0.00155536
		333.4	0.00148786
		333.54	0.00142382
		333.68	0.00136313
		333.82	0.00130564
		333.96	0.00125122
		334.1	0.00119971
		334.24	0.00115098
		334.38	0.00110488
		334.52	0.00106126
		334.66	0.00101999
		334.8	0.000980923
		334.94	0.00094392
		335.08	0.000908853
		335.22	0.000875596
		335.36	0.000844028
		335.5	0.000814033
		335.64	0.000785503
		335.78	0.000758334
		335.92	0.00073243
		336.06	0.0007077
		336.2	0.000684059
		336.34	0.000661428
		336.48	0.000639734
		336.62	0.000618909
		336.76	0.000598891
		336.9	0.000579623
		337.04	0.000561053
		337.18	0.000543131
		337.32	0.000525816
		337.46	0.000509067
		337.6	0.000492848
		337.74	0.000477126
		337.88	0.000461874
		338.02	0.00044705
		338.16	0.000432659
		338.3	0.000418665
		338.44	0.000405038
		338.58	0.000391784
		338.72	0.000378875
		338.86	0.000366299
		339	0.000354042
		339.14	0.000342095
		339.28	0.000330447
		339.42	0.000319091
		339.56	0.000308019
		339.7	0.000297224
		339.84	0.0002867
		339.98	0.000276442
		340.12	0.000266445
		340.26	0.000256703
		340.4	0.000247214
		340.54	0.000237974
		340.68	0.000228978
		340.82	0.000220224
		340.96	0.000211698
		341.1	0.000203409
		341.24	0.000195365
		341.38	0.000187549
		341.52	0.000179959
		341.66	0.000172592
		341.8	0.000165445
		341.94	0.000158515
		342.08	0.0001518
		342.22	0.000145296
		342.36	0.000139
		342.5	0.000132909
		342.64	0.00012702
		342.78	0.000121329
		342.92	0.000115833
		343.06	0.000110529
		343.2	0.000105412
		343.34	0.00010048
		343.48	9.57277e-05
		343.62	9.11523e-05
		343.76	8.67496e-05
		343.9	8.25158e-05
		344.04	7.84469e-05
		344.18	7.45389e-05
		344.32	7.07878e-05
		344.46	6.71773e-05
		344.6	6.37183e-05
		344.74	6.0417e-05
		344.88	5.72556e-05
		345.02	5.42304e-05
		345.16	5.13371e-05
		345.3	4.85718e-05
		345.44	4.59306e-05
		345.58	4.34095e-05
		345.72	4.10045e-05
		345.86	3.87003e-05
		346	3.65173e-05
		346.14	3.44387e-05
		346.28	3.24608e-05
		346.42	3.05797e-05
		346.56	2.8792e-05
		346.7	2.70941e-05
		346.84	2.54824e-05
		346.98	2.39535e-05
		347.12	2.25041e-05
		347.26	2.11309e-05
		347.4	1.98307e-05
		347.54	1.86004e-05
		347.68	1.74369e-05
		347.82	1.63373e-05
		347.96	1.52987e-05
		348.1	1.43183e-05
		348.24	1.33934e-05
		348.38	1.25215e-05
		348.52	1.17e-05
		348.66	1.09264e-05
		348.8	1.01984e-05
		348.94	9.51374e-06
		349.08	8.87021e-06
		349.22	8.26571e-06
		349.36	7.69821e-06
		349.5	7.16577e-06
		349.64	6.66652e-06
		349.78	6.19869e-06
		349.92	5.76054e-06
		350.06	5.35046e-06
		350.2	4.96686e-06
		350.34	4.60825e-06
		350.48	4.27321e-06
		350.62	3.96037e-06
		350.76	3.66844e-06
		350.9	3.39617e-06
		351.04	3.1424e-06
		351.18	2.90601e-06
		351.32	2.68594e-06
		351.46	2.48119e-06
		351.6	2.29079e-06
		351.74	2.11386e-06
		351.88	1.94953e-06
		352.02	1.79699e-06
		352.16	1.65549e-06
		352.3	1.5243e-06
		352.44	1.40275e-06
		352.58	1.29018e-06
		352.72	1.186e-06
		352.86	1.08964e-06
		353	1.00057e-06
		353.14	9.18271e-07
		353.28	8.42287e-07
		353.42	7.72169e-07
		353.56	7.07504e-07
		353.7	6.479e-07
		353.84	5.92996e-07
		353.98	5.42448e-07
		354.12	4.95939e-07
		354.26	4.53171e-07
		354.4	4.13866e-07
		354.54	3.77764e-07
		354.68	3.44624e-07
		354.82	3.1422e-07
		354.96	2.86342e-07
		355.1	2.60796e-07
		355.24	2.37399e-07
		355.38	2.15984e-07
		355.52	1.96394e-07
		355.66	1.78483e-07
		355.8	1.62117e-07
		355.94	1.47172e-07
		356.08	1.33532e-07
		356.22	1.2109e-07
		356.36	1.09748e-07
		356.5	9.9414e-08
		356.64	9.0004e-08
		356.78	8.14403e-08
		356.92	7.36514e-08
		357.06	6.65711e-08
		357.2	6.01387e-08
		357.34	5.42983e-08
		357.48	4.89984e-08
		357.62	4.41917e-08
		357.76	3.98349e-08
		357.9	3.5888e-08
		358.04	3.23146e-08
		358.18	2.90812e-08
		358.32	2.61571e-08
		358.46	2.35142e-08
		358.6	2.11268e-08
		358.74	1.89715e-08
		358.88	1.70268e-08
		359.02	1.52731e-08
		359.16	1.36926e-08
		359.3	0
		359.44	0
		359.58	0
		359.72	0
		359.86	0
[truncated: 1 more rows]

## Sheet: PlotDat15
Source sheet	TO-19-16 UPb_All_Integrations	0.201	0.02734	0.162497	0.024	0.159197	0.0235416	0.231597	0.0274806	0.226254	0.0280916	0.240164	0.0286083	0.32791	0.0288215	0.211716	0.0289494	0.214373	0.0290473	0.223507	0.0292505	0.218716	0.029326	0.222836	0.0299316	0.267731	0.0298691	0.231821	0.0301179	0.255612	0.0299851	0.236045	0.0302664	0.287283	0.0307528	0.280731	0.0303262	0.267612	0.0301586	0.238477	0.0302038	0.250821	0.0305204	0.220582	0.0303923	0.253254	0.0304201	0.283522	0.0307982
Plot name	Concordia15	0.203	0.0277	0.162497	0.024	0.17067	0.0251306	0.231179	0.0276606	0.225933	0.0282771	0.239629	0.0287941	0.326956	0.0291586	0.211215	0.02915	0.213972	0.029206	0.223054	0.0295208	0.218215	0.0295249	0.222417	0.0301797	0.267266	0.0300556	0.231509	0.0302969	0.255206	0.0301883	0.235592	0.0304594	0.286839	0.0309669	0.280079	0.0305183	0.267206	0.0303793	0.238144	0.0303669	0.250385	0.0306934	0.220314	0.0305151	0.252935	0.0305916	0.282961	0.0309856
Plot Type	1	0.201	0.02841	0.165712	0.0244456	0.182256	0.026722	0.229937	0.0278317	0.224987	0.0284469	0.23804	0.0289695	0.324115	0.0294848	0.209726	0.0293438	0.21278	0.0293575	0.221704	0.0297828	0.216726	0.0297173	0.221172	0.0304165	0.265882	0.030237	0.230584	0.0304662	0.253999	0.0303859	0.234251	0.0306398	0.285523	0.0311641	0.278143	0.0306998	0.265999	0.0305946	0.237151	0.0305254	0.249093	0.0308538	0.219519	0.0306307	0.251991	0.0307543	0.28129	0.0311597
1st free col	163	0.23	0.0286	0.168936	0.0248913	0.193957	0.028316	0.227907	0.0279895	0.223442	0.0285963	0.235441	0.0291296	0.319443	0.0297938	0.20729	0.0295255	0.210831	0.0294975	0.219484	0.0300316	0.21429	0.0298981	0.219127	0.0306374	0.263604	0.03041	0.229064	0.0306225	0.252013	0.0305741	0.232057	0.0308028	0.283359	0.0313407	0.274976	0.0308657	0.264013	0.0308002	0.235527	0.0306751	0.246981	0.0309971	0.218219	0.0307358	0.250448	0.0309037	0.278544	0.031317
Sigma Level	2	0.175	0.0289	0.172169	0.0253372	0.205774	0.0299124	0.225142	0.0281296	0.221338	0.0287212	0.231902	0.0292701	0.313029	0.0300796	0.203973	0.0296901	0.208177	0.0296224	0.216437	0.0302622	0.210974	0.0300623	0.216319	0.0308381	0.260477	0.0305711	0.226979	0.0307629	0.249287	0.0307491	0.229071	0.0309439	0.28039	0.0314931	0.270664	0.0310116	0.261288	0.0309922	0.233316	0.0308119	0.244105	0.0311195	0.21645	0.0308278	0.248346	0.0310359	0.274775	0.0314546
Absolute Errs	TRUE	0.185	0.02894	0.175411	0.0257834	0.217708	0.0315113	0.221719	0.0282481	0.218735	0.0288183	0.227521	0.0293872	0.305	0.0303366	0.199866	0.0298332	0.204891	0.0297287	0.212623	0.0304703	0.206866	0.0302054	0.212805	0.0310147	0.256563	0.0307172	0.224368	0.0308844	0.245874	0.0309076	0.225373	0.0310593	0.276674	0.0316184	0.265324	0.0311334	0.257875	0.0311669	0.230578	0.0309319	0.240544	0.0312177	0.214258	0.0309039	0.245744	0.0311472	0.270057	0.0315697
Symbol Type	1	0.177	0.0291	0.178661	0.0262297	0.229759	0.0331127	0.217731	0.0283418	0.215702	0.0288849	0.222416	0.0294775	0.29551	0.0305597	0.19508	0.0299508	0.201063	0.0298134	0.208115	0.0306516	0.202081	0.0303236	0.208652	0.0311637	0.251937	0.0308454	0.221282	0.0309849	0.241841	0.0310465	0.221066	0.0311457	0.272283	0.0317141	0.259102	0.0312279	0.253842	0.0313208	0.227388	0.031032	0.236396	0.0312889	0.211706	0.0309622	0.242713	0.0312346	0.264481	0.03166
Inverse Plot	FALSE	0.182	0.02929	0.181921	0.0266762	0.24193	0.0347165	0.213286	0.0284082	0.212323	0.0289192	0.216727	0.0295388	0.284746	0.0307448	0.189747	0.0300397	0.196796	0.0298743	0.203001	0.0308028	0.196748	0.0304136	0.203942	0.0312824	0.246689	0.0309533	0.217783	0.0310623	0.237266	0.0311631	0.216265	0.0312009	0.267303	0.0317784	0.252169	0.0312924	0.249267	0.0314509	0.223832	0.0311093	0.231773	0.0313313	0.208861	0.0310011	0.239335	0.0312957	0.258156	0.0317239
Color Plot	TRUE	0.18	0.0296	0.18519	0.0271229	0.254222	0.0363229	0.208506	0.0284455	0.208689	0.0289202	0.210609	0.0295693	0.272916	0.0308881	0.184012	0.0300976	0.192207	0.0299098	0.197382	0.0309208	0.191012	0.0304729	0.198765	0.0313682	0.240922	0.0310387	0.213938	0.0311152	0.232239	0.0312551	0.211103	0.0312234	0.26183	0.03181	0.244713	0.0313252	0.244239	0.0315547	0.220009	0.0311619	0.226802	0.0313436	0.205802	0.0310195	0.235702	0.0313287	0.251205	0.0317601
3D plot	FALSE	0.22	0.0298	0.188468	0.0275698	IsoLine	IsoLine	0.203522	0.0284526	0.204901	0.0288879	0.204228	0.0295681	0.260251	0.0309868	0.17803	0.0301228	0.187422	0.0299187	0.191366	0.0310034	0.185031	0.0304999	0.193224	0.0314197	0.234748	0.0311	0.209821	0.0311424	0.226856	0.0313207	0.205719	0.0312124	0.255972	0.0318084	0.236937	0.0313254	0.238857	0.0316302	0.216021	0.0311883	0.221618	0.0313255	0.202612	0.031017	0.231913	0.0313329	0.243764	0.0317679
Linear	FALSE	0.2	0.0298	0.191754	0.0280169			0.198468	0.0284294	0.20106	0.0288232	0.19776	0.0295354	0.246996	0.0310391	0.171966	0.0301146	0.182571	0.029901	0.18507	0.0310489	0.178967	0.030494	0.187425	0.0314358	0.228286	0.0311361	0.205513	0.0311435	0.221223	0.0313587	0.200262	0.0311685	0.249841	0.0317735	0.229054	0.031293	0.233224	0.031676	0.211979	0.0311876	0.216362	0.0312776	0.199377	0.0309934	0.228073	0.0313081	0.235977	0.0317471
Data Range	V145:Z221	0.214	0.0299	0.19505	0.0284642			0.193484	0.0283765	0.197273	0.0287279	0.19138	0.0294719	0.233411	0.031044	0.165985	0.0300733	0.177786	0.0298571	0.178617	0.0310565	0.172986	0.0304552	0.181481	0.0314161	0.221664	0.0311461	0.201097	0.0311185	0.215449	0.0313683	0.194879	0.0310926	0.243558	0.031706	0.221278	0.0312289	0.22745	0.031691	0.207991	0.0311601	0.211179	0.031201	0.196188	0.0309497	0.224285	0.031255	0.227996	0.0316981
Filled Symbols	FALSE	0.203	0.03	0.198355	0.0289117			0.188705	0.0282953	0.193641	0.0286046	0.185263	0.0293795	0.21976	0.0310012	0.16025	0.03	0.173198	0.0297881	0.172132	0.031026	0.16725	0.0303846	0.175509	0.031361	0.215009	0.0311299	0.196661	0.0310678	0.209647	0.0313493	0.189717	0.0309869	0.237244	0.0316073	0.213822	0.0311347	0.221648	0.0316751	0.204167	0.0311063	0.206209	0.031098	0.193129	0.0308868	0.220653	0.031175	0.219975	0.0316219
ConcAge	FALSE	0.242	0.0301	0.20167	0.0293594			0.184261	0.028188	0.190265	0.0284565	0.179574	0.0292607	0.206308	0.0309117	0.154917	0.0298967	0.168932	0.0296961	0.165743	0.030958	0.161917	0.0302842	0.169624	0.0312717	0.208451	0.0310878	0.192289	0.0309924	0.20393	0.031302	0.184918	0.0308543	0.231023	0.0314792	0.20689	0.0310132	0.215931	0.0316285	0.200612	0.0310279	0.201588	0.0309713	0.190285	0.0308065	0.217276	0.0310704	0.212073	0.03152
ConcSwap	FALSE	0.233	0.03013	0.204993	0.0298073			0.180274	0.0280576	0.187236	0.0282879	0.174471	0.0291186	0.193317	0.0307772	0.150132	0.0297662	0.165104	0.0295834	0.159572	0.0308539	0.157132	0.0301566	0.163941	0.0311499	0.202118	0.0310207	0.188068	0.0308938	0.198409	0.0312275	0.180612	0.0306984	0.225015	0.0313243	0.200669	0.0308676	0.21041	0.0315522	0.197422	0.0309268	0.197441	0.0308244	0.187733	0.0307111	0.214246	0.0309439	0.204441	0.0313944
1st Symbol-row	1	0.226	0.0301	0.208325	0.0302554			0.176852	0.0279076	0.184638	0.0281032	0.170091	0.0289572	0.18104	0.0306004	0.146025	0.0296121	0.161818	0.0294531	0.153741	0.0307156	0.153025	0.0300054	0.15857	0.0309979	0.196133	0.0309298	0.184078	0.0307739	0.193192	0.0311272	0.176917	0.0305235	0.219339	0.0311456	0.19533	0.0307019	0.205192	0.0314476	0.194684	0.0308059	0.193883	0.0306613	0.185544	0.0306031	0.211645	0.030799	0.197229	0.0312474
		0.214	0.0302	0.211667	0.0307037			0.174088	0.0277421	0.18254	0.0279075	0.166554	0.0287809	0.169716	0.0303846	0.142708	0.0294386	0.159166	0.0293089	0.148362	0.0305459	0.149708	0.0298347	0.153617	0.0308187	0.190612	0.0308169	0.180399	0.0306351	0.188379	0.031003	0.173934	0.0303343	0.214103	0.0309465	0.191019	0.0305206	0.20038	0.0313168	0.192473	0.0306685	0.19101	0.0304864	0.183776	0.0304855	0.209546	0.0306397	0.190576	0.031082
		0.219	0.03023	0.215018	0.0311521			0.172059	0.0275657	0.181	0.0277061	0.163956	0.0285945	0.159566	0.0301341	0.140273	0.0292503	0.157217	0.0291545	0.143541	0.030348	0.147273	0.0296492	0.149177	0.0306157	0.185664	0.0306842	0.177101	0.03048	0.184065	0.0308573	0.171743	0.0301359	0.20941	0.0307309	0.187854	0.0303286	0.196065	0.0311623	0.190849	0.0305183	0.1889	0.0303045	0.182477	0.0303614	0.208004	0.0304703	0.184614	0.0309014
		0.201	0.03025	0.218378	0.0316008			0.17082	0.0273831	0.18006	0.0275046	0.162369	0.028403	0.150786	0.0298537	0.138784	0.0290526	0.156027	0.0289944	0.139371	0.0301258	0.145784	0.0294538	0.145337	0.030393	0.181384	0.0305343	0.174249	0.0303117	0.180334	0.030693	0.170405	0.0299339	0.205352	0.0305031	0.185919	0.0301312	0.192334	0.0309871	0.189856	0.0303595	0.187612	0.0301206	0.181684	0.0302343	0.207062	0.0302954	0.179457	0.0307091
		0.23	0.03027	0.221748	0.0320497			0.170403	0.0271994	0.179746	0.0273084	0.161836	0.0282117	0.143548	0.0295489	0.138284	0.0288506	0.155627	0.0288327	0.135934	0.0298837	0.145284	0.029254	0.142172	0.0301549	0.177855	0.0303702	0.171898	0.0301334	0.177258	0.0305132	0.169955	0.0297336	0.202006	0.0302674	0.185269	0.0299338	0.189258	0.0307947	0.189523	0.0301962	0.187179	0.0299396	0.181418	0.0301077	0.206746	0.0301199	0.175205	0.0305088
		0.226	0.0303	0.225127	0.0324987			0.170821	0.0270194	0.180067	0.0271229	0.162371	0.0280259	0.137993	0.0292257	0.138785	0.02865	0.156028	0.028674	0.133295	0.0296263	0.145785	0.0290551	0.139743	0.0299059	0.175147	0.0301949	0.170094	0.0299487	0.174897	0.0303215	0.170408	0.0295406	0.19944	0.0300284	0.185921	0.0297417	0.186897	0.0305887	0.189856	0.0300331	0.187615	0.0297666	0.181686	0.0299849	0.207065	0.0299484	0.171943	0.0303044
		0.202	0.0304	0.228515	0.032948			0.172063	0.0268483	0.181013	0.0269531	0.16396	0.0278505	0.134229	0.0288902	0.140274	0.0284562	0.15722	0.0285225	0.131508	0.0293587	0.147274	0.0288627	0.138098	0.029651	0.173312	0.0300119	0.168872	0.029761	0.173297	0.0301216	0.171749	0.0293602	0.197701	0.0297909	0.187857	0.0295602	0.185297	0.0303732	0.190849	0.0298746	0.188907	0.0296062	0.182481	0.0298693	0.208009	0.0297857	0.169732	0.0301
		0.205	0.03041	0.231913	0.0333974			0.174093	0.0266905	0.182558	0.0268037	0.166559	0.0276904	0.132328	0.0285491	0.14271	0.0282745	0.159169	0.0283825	0.130606	0.0290861	0.14971	0.0286819	0.137268	0.0293951	0.172385	0.0298248	0.168256	0.0295741	0.172489	0.0299174	0.173943	0.0291972	0.196825	0.0295593	0.191024	0.0293943	0.18449	0.0301524	0.192473	0.0297249	0.191019	0.0294629	0.183781	0.0297642	0.209552	0.0296363	0.168617	0.0298994
		0.219	0.03041	0.23532	0.033847			0.176858	0.0265504	0.184662	0.0266788	0.170098	0.0275499	0.132329	0.028209	0.146027	0.0281099	0.161823	0.0282576	0.130607	0.0288137	0.153026	0.0285177	0.13727	0.0291432	0.172385	0.0296373	0.168258	0.0293916	0.17249	0.0297128	0.176929	0.0290561	0.196829	0.0293383	0.195336	0.0292484	0.18449	0.0299306	0.194684	0.0295881	0.193895	0.0293405	0.18555	0.0296722	0.211654	0.0295041	0.168619	0.0297067
		0.178	0.0305	0.238736	0.0342969			0.180281	0.0264319	0.187265	0.0265817	0.174479	0.0274328	0.134231	0.0278766	0.150134	0.0279668	0.165109	0.0281513	0.13151	0.0285469	0.157134	0.0283746	0.138103	0.0289002	0.173312	0.0294528	0.168877	0.029217	0.173298	0.0295119	0.180627	0.0289407	0.197711	0.0291321	0.200676	0.0291266	0.185298	0.0297121	0.197422	0.0294681	0.197456	0.0292423	0.187742	0.0295961	0.214256	0.0293928	0.169737	0.0295255
		0.212	0.0305	0.242162	0.0347469			0.184269	0.0263382	0.190298	0.0265151	0.179584	0.0273425	0.137997	0.0275582	0.15492	0.0278492	0.168937	0.0280666	0.1333	0.0282908	0.161919	0.0282564	0.139753	0.0286708	0.175148	0.0292752	0.170103	0.0290538	0.174899	0.0293186	0.184934	0.0288543	0.199455	0.0289448	0.206898	0.0290321	0.186899	0.0295011	0.200612	0.029368	0.201604	0.0291711	0.190294	0.0295378	0.217287	0.0293054	0.171951	0.0293594
		0.201	0.03056	0.245597	0.0351971			0.188714	0.0262718	0.193677	0.0264808	0.185273	0.0272812	0.143553	0.02726	0.160253	0.0277603	0.173204	0.0280057	0.13594	0.0280505	0.167252	0.0281664	0.142185	0.0284595	0.177857	0.0291078	0.17191	0.0289051	0.17726	0.0291365	0.189735	0.0287991	0.202028	0.0287799	0.213831	0.0289676	0.18926	0.0293018	0.204168	0.0292907	0.206227	0.0291287	0.193139	0.0294989	0.220665	0.0292443	0.175217	0.0292115
		0.208	0.0306	0.249042	0.0356476			0.193494	0.0262345	0.197311	0.0264798	0.191391	0.0272507	0.150792	0.026988	0.165988	0.0277024	0.177793	0.0279702	0.139379	0.0278306	0.172988	0.0281071	0.145354	0.0282704	0.181386	0.0289538	0.174264	0.0287738	0.180337	0.0289694	0.194897	0.0287766	0.205378	0.0286407	0.221287	0.0289348	0.192337	0.029118	0.207991	0.0292381	0.211198	0.0291164	0.196198	0.0294805	0.224298	0.0292113	0.179471	0.0290849
		0.214	0.0307	0.252497	0.0360982			0.198478	0.0262274	0.201099	0.0265121	0.197772	0.0272519	0.159573	0.0267473	0.17197	0.0276772	0.182578	0.0279613	0.14355	0.0276355	0.178969	0.0280801	0.149196	0.0281072	0.185666	0.0288163	0.177119	0.0286626	0.184069	0.0288203	0.200281	0.0287876	0.209442	0.02853	0.229063	0.0289346	0.196069	0.0289534	0.211979	0.0292117	0.216382	0.0291345	0.199388	0.029483	0.228087	0.0292071	0.18463	0.0289819
		0.187	0.0307	0.25596	0.036549			0.203532	0.0262506	0.20494	0.0265768	0.20424	0.0272846	0.169725	0.0265427	0.178034	0.0276854	0.187429	0.027979	0.148372	0.0274688	0.185033	0.028086	0.153639	0.027973	0.190615	0.028698	0.18042	0.0285734	0.188384	0.0286922	0.205738	0.0288315	0.214139	0.0284497	0.236946	0.028967	0.200383	0.028811	0.216021	0.0292124	0.221638	0.0291824	0.202623	0.0295066	0.231927	0.0292319	0.190595	0.0289046
		0.251	0.0307	0.259434	0.037			0.208516	0.0263035	0.208727	0.0266721	0.21062	0.0273481	0.18105	0.0263782	0.184015	0.0277267	0.192214	0.0280229	0.153752	0.0273339	0.191014	0.0281248	0.158594	0.0278705	0.196136	0.0286011	0.184101	0.0285081	0.193197	0.0285877	0.211121	0.0289074	0.219378	0.0284017	0.244722	0.0290311	0.205196	0.0286938	0.220009	0.0292399	0.226821	0.029259	0.205812	0.0295503	0.235715	0.029285	0.197249	0.0288544
		0.214	0.0307	0.259434	0.037			0.213295	0.0263847	0.212359	0.0267954	0.216737	0.0274405	0.193327	0.0262568	0.18975	0.0278	0.196802	0.0280919	0.159584	0.0272334	0.19675	0.0281954	0.163966	0.0278016	0.202121	0.0285275	0.188092	0.028468	0.198415	0.0285087	0.216283	0.0290131	0.225058	0.0283866	0.252178	0.0291253	0.210414	0.0286039	0.223833	0.0292937	0.231791	0.029362	0.208871	0.0296132	0.239347	0.029365	0.204463	0.0288324
		0.2	0.0307	IsoLine	IsoLine			0.217739	0.026492	0.215735	0.0269435	0.222426	0.0275593	0.206319	0.0261811	0.195083	0.0279033	0.201068	0.0281839	0.165755	0.0271692	0.202083	0.0282958	0.169651	0.0277678	0.208455	0.0284787	0.192315	0.0284538	0.203936	0.0284568	0.221082	0.0291457	0.231067	0.0284049	0.25911	0.0292468	0.215935	0.0285431	0.227388	0.0293721	0.236412	0.0294887	0.211715	0.0296935	0.242724	0.0294696	0.212096	0.0288389
		0.196	0.0307					0.221726	0.0266224	0.218764	0.0271121	0.227529	0.0277014	0.219771	0.0261525	0.199868	0.0280338	0.204896	0.0282966	0.172145	0.0271426	0.206868	0.0284234	0.175536	0.0277696	0.215013	0.0284557	0.196687	0.0284658	0.209653	0.028433	0.225388	0.0293016	0.237289	0.0284562	0.265331	0.0293924	0.221653	0.0285126	0.230578	0.0294732	0.240559	0.0296356	0.214267	0.0297889	0.245754	0.0295961	0.219999	0.0288739
		0.197	0.03075					0.225148	0.0267724	0.221362	0.0272968	0.231909	0.0278628	0.233423	0.0261715	0.203975	0.0281879	0.208182	0.0284269	0.178629	0.027154	0.210975	0.0285746	0.181509	0.0278071	0.221668	0.0284587	0.201124	0.0285037	0.215455	0.0284377	0.229083	0.0294765	0.243603	0.0285395	0.27067	0.0295581	0.227454	0.0285131	0.233316	0.0295941	0.244117	0.0297987	0.216456	0.0298969	0.248355	0.029741	0.228019	0.0289366
		0.228	0.0308					0.227912	0.0269379	0.22346	0.0274925	0.235446	0.0280391	0.247007	0.0262378	0.207292	0.0283614	0.210834	0.0285711	0.185082	0.0272034	0.214292	0.0287453	0.187452	0.0278794	0.22829	0.0284879	0.205538	0.0285669	0.221229	0.0284709	0.232066	0.0296657	0.249886	0.0286532	0.274981	0.0297394	0.233228	0.0285444	0.235527	0.0297315	0.24699	0.0299736	0.218224	0.0300145	0.250454	0.0299003	0.236	0.0290259
		0.217	0.0308					0.229941	0.0271143	0.225	0.0276939	0.238044	0.0282255	0.260261	0.02635	0.209727	0.0285497	0.212783	0.0287255	0.191378	0.0272897	0.216727	0.0289308	0.19325	0.0279852	0.234752	0.0285427	0.209846	0.0286541	0.226862	0.0285319	0.234257	0.0298641	0.256015	0.028795	0.278146	0.0299314	0.238861	0.028606	0.237151	0.0298817	0.2491	0.0301555	0.219523	0.0301386	0.251996	0.0300697	0.243787	0.02914
		0.252	0.0308					0.23118	0.0272969	0.22594	0.0278954	0.239631	0.028417	0.272926	0.0265061	0.211216	0.0287474	0.213973	0.0288856	0.197393	0.0274112	0.218216	0.0291262	0.19879	0.0281225	0.240926	0.0286219	0.213961	0.0287636	0.232244	0.0286195	0.235595	0.0300661	0.261871	0.0289623	0.280081	0.0301288	0.244243	0.0286966	0.238144	0.0300405	0.250388	0.0303394	0.220316	0.0302657	0.252938	0.0302446	0.251227	0.0292766
		0.219	0.03083					0.231597	0.0274806	0.226254	0.0280916	0.240164	0.0286083	0.284755	0.0267029	0.211716	0.0289494	0.214373	0.0290473	0.203012	0.0275655	0.218716	0.029326	0.203965	0.0282885	0.246692	0.028724	0.217805	0.0288933	0.237271	0.0287321	0.236045	0.0302664	0.267341	0.0291516	0.280731	0.0303262	0.249271	0.0288146	0.238477	0.0302038	0.250821	0.0305204	0.220582	0.0303923	0.253254	0.0304201	0.258176	0.0294332
		0.224	0.0309											0.295519	0.0269366					0.208124	0.0277498			0.208673	0.0284801	0.25194	0.0288471	0.221302	0.0290406	0.241846	0.0288674			0.272317	0.0293595			0.253845	0.0289576									0.264499	0.0296066
		0.226	0.031											0.305007	0.0272027					0.212631	0.0279603			0.212823	0.0286934	0.256565	0.0289887	0.224384	0.0292027	0.245878	0.0290227			0.276704	0.0295817			0.257878	0.0291229									0.270072	0.0297935
		0.223	0.03097											0.313035	0.027496					0.216444	0.028193			0.216334	0.0289244	0.260479	0.0291462	0.226992	0.0293764	0.24929	0.0291952			0.280415	0.0298141			0.26129	0.0293072									0.274788	0.0299903
		0.202	0.031											0.319447	0.0278108					0.219489	0.0284434			0.219138	0.0291686	0.263605	0.0293163	0.229075	0.0295584	0.252015	0.0293814			0.283378	0.030052			0.264015	0.0295068									0.278554	0.0301932
		0.203	0.03099											0.324119	0.0281409					0.221707	0.0287065			0.22118	0.0294211	0.265883	0.0294959	0.230592	0.029745	0.254001	0.0295777			0.285535	0.0302908			0.266	0.0297181									0.281297	0.030398
		0.219	0.03098											0.326958	0.02848					0.223055	0.0289773			0.222421	0.0296771	0.267267	0.0296813	0.231513	0.0299328	0.255207	0.0297802			0.286846	0.0305259			0.267207	0.0299368									0.282964	0.030601
		0.219	0.031											0.32791	0.0288215					0.223507	0.0292505			0.222836	0.0299316	0.267731	0.0298691	0.231821	0.0301179	0.255612	0.0299851			0.287283	0.0307528			0.267612	0.0301586									0.283522	0.0307982
		0.186	0.031
		0.203	0.0311
		0.203	0.03113
		0.204	0.0312
		0.218	0.0312
		0.256	0.0312
		0.199	0.0312
		0.23	0.03129
		0.178	0.0313
		0.208	0.0315
		0.207	0.0315
		0.237	0.0315
		0.222	0.0315
		0.192	0.0315
		0.217	0.0316
		0.186	0.0317
		0.187	0.0317
		0.2212	0.03173
		0.264	0.0318
		0.235	0.03179
		0.218	0.0319
		0.189	0.032
		0.182	0.032
		0.252	0.03199
		0.239	0.03211
		0.232	0.03219
		0.187	0.0324
		0.176	0.0324
		0.207	0.0324
		0.229	0.0325
		0.226	0.0326
		IsoLine	IsoLine
[truncated: 112 more columns]

## Sheet: PlotDat17
Source sheet	TO-19-16 UPb_All_Integrations	160	2.59392e-06	170.5	0	160	0
Plot name	ProbDens17	160.035	2.65478e-06	174	0	229.965	0
Plot Type	16	160.07	2.70406e-06	174	1
1st free col	9	160.105	2.75419e-06	170.5	1
Sigma Level	2	160.14	2.8052e-06	170.5	0
Absolute Errs	TRUE	160.175	2.8571e-06	ErrBox	ErrBox
Symbol Type	1	160.21	2.90989e-06	174	0
Inverse Plot	FALSE	160.245	2.96361e-06	177.5	0
Color Plot	TRUE	160.28	3.01825e-06	177.5	1
3D plot	FALSE	160.315	3.07385e-06	174	1
Linear	FALSE	160.35	3.13041e-06	174	0
Data Range	AB145:AC221	160.385	3.18796e-06	ErrBox	ErrBox
Filled Symbols	TRUE	160.42	3.24651e-06	177.5	0
ConcAge	FALSE	160.455	3.30607e-06	181	0
ConcSwap	FALSE	160.49	3.36667e-06	181	1
1st Symbol-row	1	160.525	3.42832e-06	177.5	1
		160.56	3.49104e-06	177.5	0
		160.595	3.55486e-06	ErrBox	ErrBox
		160.63	3.63341e-06	181	0
		160.665	3.7002e-06	184.5	0
		160.7	3.76819e-06	184.5	3
		160.735	3.83738e-06	181	3
		160.77	3.90782e-06	181	0
		160.805	3.97951e-06	ErrBox	ErrBox
		160.84	4.05248e-06	184.5	0
		160.875	4.12676e-06	188	0
		160.91	4.20238e-06	188	2
		160.945	4.27935e-06	184.5	2
		160.98	4.35771e-06	184.5	0
		161.015	4.43749e-06	ErrBox	ErrBox
		161.05	4.51871e-06	188	0
		161.085	4.60141e-06	191.5	0
		161.12	4.6856e-06	191.5	8
		161.155	4.77133e-06	188	8
		161.19	4.85863e-06	188	0
		161.225	4.94752e-06	ErrBox	ErrBox
		161.26	5.05123e-06	191.5	0
		161.295	5.14386e-06	195	0
		161.33	5.23821e-06	195	14
		161.365	5.33431e-06	191.5	14
		161.4	5.4322e-06	191.5	0
		161.435	5.53191e-06	ErrBox	ErrBox
		161.47	5.6335e-06	195	0
		161.505	5.73699e-06	198.5	0
		161.54	5.84243e-06	198.5	23
		161.575	5.94987e-06	195	23
		161.61	6.05935e-06	195	0
		161.645	6.17091e-06	ErrBox	ErrBox
		161.68	6.2846e-06	198.5	0
		161.715	6.40048e-06	202	0
		161.75	6.51859e-06	202	13
		161.785	6.63898e-06	198.5	13
		161.82	6.76171e-06	198.5	0
		161.855	6.88683e-06	ErrBox	ErrBox
		161.89	7.0144e-06	202	0
		161.925	7.14447e-06	205.5	0
		161.96	7.27711e-06	205.5	8
		161.995	7.41238e-06	202	8
		162.03	7.55035e-06	202	0
		162.065	7.69107e-06	ErrBox	ErrBox
		162.1	7.83462e-06	205.5	0
		162.135	7.98106e-06	209	0
		162.17	8.13047e-06	209	3
		162.205	8.28293e-06	205.5	3
		162.24	8.4385e-06	205.5	0
		162.275	8.59727e-06	ErrBox	ErrBox
		162.31	8.75933e-06
		162.345	8.92474e-06
		162.38	9.09361e-06
		162.415	9.26602e-06
		162.45	9.44205e-06
		162.485	9.62182e-06
		162.52	9.80541e-06
		162.555	9.99293e-06
		162.59	1.01845e-05
		162.625	1.03802e-05
		162.66	1.05801e-05
		162.695	1.07844e-05
		162.73	1.09932e-05
		162.765	1.12066e-05
		162.8	1.14247e-05
		162.835	1.16477e-05
		162.87	1.18756e-05
		162.905	1.21087e-05
		162.94	1.23471e-05
		162.975	1.25909e-05
		163.01	1.28403e-05
		163.045	1.30953e-05
		163.08	1.33563e-05
		163.115	1.36234e-05
		163.15	1.38966e-05
		163.185	1.41763e-05
		163.22	1.44625e-05
		163.255	1.47555e-05
		163.29	1.50555e-05
		163.325	1.53626e-05
		163.36	1.56771e-05
		163.395	1.59992e-05
		163.43	1.6329e-05
		163.465	1.66669e-05
		163.5	1.7013e-05
		163.535	1.73677e-05
		163.57	1.7731e-05
		163.605	1.81033e-05
		163.64	1.84849e-05
		163.675	1.8876e-05
		163.71	1.92769e-05
		163.745	1.96878e-05
		163.78	2.01091e-05
		163.815	2.05411e-05
		163.85	2.0984e-05
		163.885	2.14383e-05
		163.92	2.19041e-05
		163.955	2.23819e-05
		163.99	2.2872e-05
		164.025	2.33747e-05
		164.06	2.38905e-05
		164.095	2.44197e-05
		164.13	2.49626e-05
		164.165	2.55197e-05
		164.2	2.60914e-05
		164.235	2.66781e-05
		164.27	2.72802e-05
		164.305	2.78982e-05
		164.34	2.85326e-05
		164.375	2.91837e-05
		164.41	2.98521e-05
		164.445	3.05383e-05
		164.48	3.12428e-05
		164.515	3.1966e-05
		164.55	3.27086e-05
		164.585	3.3471e-05
		164.62	3.42538e-05
		164.655	3.50577e-05
		164.69	3.58831e-05
		164.725	3.67307e-05
		164.76	3.76011e-05
		164.795	3.84949e-05
		164.83	3.94128e-05
		164.865	4.03555e-05
		164.9	4.13235e-05
		164.935	4.23177e-05
		164.97	4.33387e-05
		165.005	4.43872e-05
		165.04	4.54641e-05
		165.075	4.657e-05
		165.11	4.77057e-05
		165.145	4.88721e-05
		165.18	5.00699e-05
		165.215	5.12999e-05
		165.25	5.25632e-05
		165.285	5.38604e-05
		165.32	5.51925e-05
		165.355	5.65604e-05
		165.39	5.7965e-05
		165.425	5.94072e-05
		165.46	6.08881e-05
		165.495	6.24086e-05
		165.53	6.39698e-05
		165.565	6.55725e-05
		165.6	6.7218e-05
		165.635	6.89072e-05
		165.67	7.06412e-05
		165.705	7.24212e-05
		165.74	7.42482e-05
		165.775	7.61235e-05
		165.81	7.80742e-05
		165.845	8.00502e-05
		165.88	8.20779e-05
		165.915	8.41587e-05
		165.95	8.62937e-05
		165.985	8.84843e-05
		166.02	9.07318e-05
		166.055	9.3051e-05
		166.09	9.54169e-05
		166.125	9.78437e-05
		166.16	0.000100333
		166.195	0.000102886
		166.23	0.000105504
		166.265	0.000108188
		166.3	0.000110941
		166.335	0.000113763
		166.37	0.000116656
		166.405	0.000119621
		166.44	0.000122661
		166.475	0.000125777
		166.51	0.000128969
		166.545	0.000132241
		166.58	0.000135593
		166.615	0.000139027
		166.65	0.000142545
		166.685	0.000146149
		166.72	0.000149839
		166.755	0.000153632
		166.79	0.000157503
		166.825	0.000161466
		166.86	0.000165524
		166.895	0.000169677
		166.93	0.000173929
		166.965	0.000178279
		167	0.000182732
		167.035	0.000187287
		167.07	0.000191948
		167.105	0.000196716
		167.14	0.000201593
		167.175	0.000206581
		167.21	0.000211681
		167.245	0.000216896
		167.28	0.000222228
		167.315	0.000227679
		167.35	0.00023325
		167.385	0.000238943
		167.42	0.000244761
		167.455	0.000250705
		167.49	0.000256777
		167.525	0.00026298
		167.56	0.000269315
		167.595	0.000275785
		167.63	0.000282391
		167.665	0.000289135
		167.7	0.000296019
		167.735	0.000303046
		167.77	0.000310216
		167.805	0.000317533
		167.84	0.000324998
		167.875	0.000332613
		167.91	0.000340393
		167.945	0.000348315
		167.98	0.000356393
		168.015	0.000364628
		168.05	0.000373023
		168.085	0.00038158
		168.12	0.000390301
		168.155	0.000399186
		168.19	0.000408239
		168.225	0.000417461
		168.26	0.000426853
		168.295	0.000436418
		168.33	0.000446157
		168.365	0.000456073
		168.4	0.000466166
		168.435	0.000476438
		168.47	0.000486891
		168.505	0.000497527
		168.54	0.000508347
		168.575	0.000519353
		168.61	0.000530545
		168.645	0.000541927
		168.68	0.000553498
		168.715	0.00056526
		168.75	0.000577216
		168.785	0.000589365
		168.82	0.000601709
		168.855	0.00061425
		168.89	0.000626988
		168.925	0.000639925
		168.96	0.000653062
		168.995	0.000666399
		169.03	0.000679937
		169.065	0.000693678
		169.1	0.000707622
		169.135	0.000721771
		169.17	0.000736123
		169.205	0.000750681
		169.24	0.000765445
		169.275	0.000780414
		169.31	0.000795591
		169.345	0.000810974
		169.38	0.000826565
		169.415	0.000842363
		169.45	0.000858369
		169.485	0.000874582
		169.52	0.000891003
		169.555	0.000907632
		169.59	0.000924468
		169.625	0.000941511
		169.66	0.000958761
		169.695	0.000976217
		169.73	0.000993878
		169.765	0.00101175
		169.8	0.00102982
		169.835	0.00104811
		169.87	0.00106658
		169.905	0.00108526
		169.94	0.00110415
		169.975	0.00112323
		170.01	0.00114251
		170.045	0.001162
		170.08	0.00118167
		170.115	0.00120154
		170.15	0.0012216
		170.185	0.00124185
		170.22	0.0012623
		170.255	0.00128292
		170.29	0.00130374
		170.325	0.00132474
		170.36	0.00134592
		170.395	0.00136728
		170.43	0.00138883
		170.465	0.00141054
		170.5	0.00143242
		170.535	0.00145447
		170.57	0.00147669
		170.605	0.00149908
		170.64	0.00152162
		170.675	0.00154432
		170.71	0.00156718
		170.745	0.00159019
		170.78	0.00161335
		170.815	0.00163665
		170.85	0.0016601
		170.885	0.00168368
		170.92	0.0017074
		170.955	0.00173125
		170.99	0.00175524
		171.025	0.00177934
		171.06	0.00180356
		171.095	0.00182791
		171.13	0.00185236
		171.165	0.00187691
		171.2	0.00190157
		171.235	0.00192633
		171.27	0.0019512
		171.305	0.00197614
		171.34	0.00200117
		171.375	0.00202628
		171.41	0.00205148
		171.445	0.00207674
		171.48	0.00210207
		171.515	0.00212746
		171.55	0.0021529
		171.585	0.0021784
		171.62	0.00220395
		171.655	0.00222954
		171.69	0.00225518
		171.725	0.00228084
		171.76	0.00230653
		171.795	0.00233224
		171.83	0.00235797
		171.865	0.00238371
		171.9	0.00240946
		171.935	0.00243521
		171.97	0.00246096
		172.005	0.00248674
		172.04	0.00251246
		172.075	0.00253817
		172.11	0.00256385
		172.145	0.0025895
		172.18	0.00261512
		172.215	0.0026407
		172.25	0.00266623
		172.285	0.00269171
		172.32	0.00271714
		172.355	0.0027425
		172.39	0.0027678
		172.425	0.00279304
		172.46	0.00281819
		172.495	0.00284326
		172.53	0.00286824
		172.565	0.00289313
		172.6	0.00291792
		172.635	0.00294262
		172.67	0.00296721
		172.705	0.00299169
		172.74	0.00301606
		172.775	0.0030403
		172.81	0.00306441
		172.845	0.00308839
		172.88	0.00311223
		172.915	0.00313594
		172.95	0.0031595
		172.985	0.00318292
		173.02	0.00320618
		173.055	0.00322928
		173.09	0.00325223
		173.125	0.00327501
		173.16	0.00329762
		173.195	0.00332006
		173.23	0.00334233
		173.265	0.00336442
		173.3	0.00338633
		173.335	0.00340804
		173.37	0.00342957
		173.405	0.00345091
		173.44	0.00347205
		173.475	0.00349299
		173.51	0.00351373
		173.545	0.00353426
		173.58	0.00355459
		173.615	0.00357471
		173.65	0.00359462
		173.685	0.00361432
		173.72	0.0036338
		173.755	0.00365306
		173.79	0.00367211
		173.825	0.00369093
		173.86	0.00370954
		173.895	0.00372792
		173.93	0.00374607
		173.965	0.003764
		174	0.0037817
		174.035	0.00379917
		174.07	0.00381642
		174.105	0.00383344
		174.14	0.00385023
		174.175	0.00386679
		174.21	0.00388312
		174.245	0.00389922
		174.28	0.00391509
		174.315	0.00393074
		174.35	0.00394616
		174.385	0.00396135
		174.42	0.00397631
		174.455	0.00399105
		174.49	0.00400556
		174.525	0.00401985
		174.56	0.00403393
		174.595	0.00404779
		174.63	0.00406143
		174.665	0.00407484
		174.7	0.00408804
		174.735	0.00410103
		174.77	0.0041138
		174.805	0.00412639
		174.84	0.00413875
		174.875	0.00415093
		174.91	0.00416289
		174.945	0.00417465
		174.98	0.00418623
		175.015	0.00419761
		175.05	0.0042088
		175.085	0.00421981
		175.12	0.00423064
		175.155	0.00424129
		175.19	0.00425178
		175.225	0.00426209
		175.26	0.00427223
		175.295	0.00428222
		175.33	0.00429205
		175.365	0.00430172
		175.4	0.00431125
		175.435	0.00432064
		175.47	0.00432989
		175.505	0.004339
		175.54	0.00434798
		175.575	0.00435685
		175.61	0.0043656
		175.645	0.00437423
		175.68	0.00438276
		175.715	0.00439118
		175.75	0.0043995
		175.785	0.00440773
		175.82	0.00441587
		175.855	0.00442393
		175.89	0.00443191
		175.925	0.00443982
		175.96	0.00444767
		175.995	0.00445546
		176.03	0.0044632
		176.065	0.00447089
		176.1	0.00447855
		176.135	0.00448616
		176.17	0.00449375
		176.205	0.00450132
		176.24	0.00450887
		176.275	0.00451642
		176.31	0.00452395
		176.345	0.00453149
		176.38	0.00453904
		176.415	0.0045466
		176.45	0.00455418
		176.485	0.00456179
		176.52	0.00456944
		176.555	0.00457712
		176.59	0.00458485
		176.625	0.00459265
		176.66	0.00460049
		176.695	0.0046084
		176.73	0.00461638
		176.765	0.00462444
		176.8	0.00463258
		176.835	0.00464081
		176.87	0.00464915
		176.905	0.00465759
		176.94	0.00466613
		176.975	0.00467479
		177.01	0.00468357
		177.045	0.00469248
		177.08	0.00470152
		177.115	0.00471072
		177.15	0.00472005
		177.185	0.00472953
		177.22	0.00473917
		177.255	0.00474898
		177.29	0.00475895
		177.325	0.0047691
		177.36	0.00477944
		177.395	0.00478996
		177.43	0.00480067
		177.465	0.0048116
		177.5	0.00482272
		177.535	0.00483405
		177.57	0.00484559
		177.605	0.00485736
		177.64	0.00486938
		177.675	0.0048816
		177.71	0.00489406
		177.745	0.00490677
		177.78	0.00491972
		177.815	0.00493292
		177.85	0.00494638
		177.885	0.00496011
		177.92	0.0049741
		177.955	0.00498836
		177.99	0.0050029
		178.025	0.00501772
		178.06	0.00503282
		178.095	0.00504822
		178.13	0.00506392
		178.165	0.0050799
		178.2	0.00509619
		178.235	0.00511279
		178.27	0.00512971
		178.305	0.00514693
		178.34	0.00516447
		178.375	0.00518234
		178.41	0.00520054
		178.445	0.00521905
		178.48	0.0052379
		178.515	0.00525709
		178.55	0.00527662
		178.585	0.00529648
		178.62	0.0053167
		178.655	0.00533726
		178.69	0.00535817
		178.725	0.00537944
		178.76	0.00540107
		178.795	0.00542307
		178.83	0.00544541
		178.865	0.00546812
		178.9	0.0054912
		178.935	0.00551464
		178.97	0.00553845
		179.005	0.00556264
		179.04	0.0055872
		179.075	0.00561213
		179.11	0.00563745
		179.145	0.00566314
		179.18	0.00568921
		179.215	0.00571566
		179.25	0.00574251
		179.285	0.00576973
		179.32	0.00579734
		179.355	0.00582534
		179.39	0.00585371
		179.425	0.00588248
		179.46	0.00591163
		179.495	0.00594118
		179.53	0.0059711
		179.565	0.00600143
		179.6	0.00603213
		179.635	0.00606322
		179.67	0.0060947
		179.705	0.00612656
		179.74	0.00615881
		179.775	0.00619144
		179.81	0.00622446
		179.845	0.00625787
		179.88	0.00629166
		179.915	0.00632583
		179.95	0.00636039
		179.985	0.00639532
		180.02	0.00643063
		180.055	0.00646632
		180.09	0.00650238
		180.125	0.00653882
		180.16	0.00657562
		180.195	0.0066128
		180.23	0.00665034
		180.265	0.00668825
		180.3	0.00672652
		180.335	0.00676515
		180.37	0.00680414
		180.405	0.00684351
		180.44	0.0068832
		180.475	0.00692325
		180.51	0.00696364
		180.545	0.00700437
		180.58	0.00704545
		180.615	0.00708686
		180.65	0.0071286
		180.685	0.00717067
		180.72	0.00721309
		180.755	0.00725582
		180.79	0.00729886
		180.825	0.00734221
		180.86	0.00738588
		180.895	0.00742985
		180.93	0.00747412
		180.965	0.00751869
		181	0.00756356
		181.035	0.00760871
		181.07	0.00765415
		181.105	0.00769986
		181.14	0.00774586
		181.175	0.00779212
		181.21	0.00783865
		181.245	0.00788546
		181.28	0.00793251
		181.315	0.00797981
		181.35	0.00802736
		181.385	0.00807516
		181.42	0.00812318
		181.455	0.00817144
		181.49	0.00821992
		181.525	0.00826862
		181.56	0.00831754
		181.595	0.00836667
		181.63	0.00841602
		181.665	0.00846556
		181.7	0.0085153
		181.735	0.00856522
		181.77	0.00861533
		181.805	0.00866564
		181.84	0.00871611
		181.875	0.00876675
		181.91	0.00881755
		181.945	0.00886851
		181.98	0.00891964
		182.015	0.00897091
		182.05	0.00902232
		182.085	0.0090739
		182.12	0.00912559
		182.155	0.00917742
		182.19	0.00922938
		182.225	0.00928146
		182.26	0.00933366
		182.295	0.00938598
		182.33	0.0094384
		182.365	0.00949095
		182.4	0.00954359
		182.435	0.00959632
		182.47	0.00964917
		182.505	0.00970209
		182.54	0.00975511
		182.575	0.00980821
		182.61	0.00986141
		182.645	0.00991467
		182.68	0.00996802
		182.715	0.0100214
		182.75	0.0100749
		182.785	0.0101285
		182.82	0.0101821
		182.855	0.0102358
		182.89	0.0102896
		182.925	0.0103434
		182.96	0.0103973
		182.995	0.0104513
		183.03	0.0105053
		183.065	0.0105594
		183.1	0.0106135
		183.135	0.0106678
		183.17	0.010722
		183.205	0.0107763
		183.24	0.0108307
		183.275	0.0108852
		183.31	0.0109397
		183.345	0.0109943
		183.38	0.011049
		183.415	0.0111037
		183.45	0.0111585
		183.485	0.0112134
		183.52	0.0112683
		183.555	0.0113234
		183.59	0.0113785
		183.625	0.0114337
		183.66	0.011489
		183.695	0.0115444
		183.73	0.0115999
		183.765	0.0116556
		183.8	0.0117113
		183.835	0.0117671
		183.87	0.0118231
		183.905	0.0118792
		183.94	0.0119354
		183.975	0.0119918
		184.01	0.0120484
		184.045	0.0121051
		184.08	0.0121619
		184.115	0.0122189
		184.15	0.0122762
		184.185	0.0123336
		184.22	0.0123912
		184.255	0.012449
		184.29	0.012507
		184.325	0.0125652
		184.36	0.0126237
		184.395	0.0126825
		184.43	0.0127415
		184.465	0.0128007
		184.5	0.0128603
		184.535	0.0129201
		184.57	0.0129803
		184.605	0.0130407
		184.64	0.0131015
		184.675	0.0131626
		184.71	0.0132241
		184.745	0.013286
		184.78	0.0133482
		184.815	0.0134108
		184.85	0.0134738
		184.885	0.0135373
		184.92	0.0136011
		184.955	0.0136655
		184.99	0.0137302
		185.025	0.0137955
		185.06	0.0138612
		185.095	0.0139275
		185.13	0.0139943
		185.165	0.0140616
		185.2	0.0141295
		185.235	0.0141979
		185.27	0.0142669
		185.305	0.0143365
		185.34	0.0144068
		185.375	0.0144777
		185.41	0.0145492
		185.445	0.0146214
		185.48	0.0146943
		185.515	0.0147679
		185.55	0.0148422
		185.585	0.0149172
		185.62	0.014993
		185.655	0.0150695
		185.69	0.0151469
		185.725	0.0152251
		185.76	0.015304
		185.795	0.0153839
		185.83	0.0154645
		185.865	0.0155461
		185.9	0.0156286
		185.935	0.0157119
		185.97	0.0157962
		186.005	0.0158815
		186.04	0.0159677
		186.075	0.0160549
		186.11	0.0161431
		186.145	0.0162323
		186.18	0.0163226
		186.215	0.0164139
		186.25	0.0165063
		186.285	0.0165998
		186.32	0.0166944
		186.355	0.0167901
		186.39	0.016887
		186.425	0.016985
		186.46	0.0170842
		186.495	0.0171846
		186.53	0.0172862
		186.565	0.0173891
		186.6	0.0174932
		186.635	0.0175986
		186.67	0.0177052
		186.705	0.0178132
		186.74	0.0179224
		186.775	0.018033
		186.81	0.018145
		186.845	0.0182583
		186.88	0.018373
		186.915	0.0184891
		186.95	0.0186066
		186.985	0.0187255
		187.02	0.0188459
		187.055	0.0189678
		187.09	0.0190911
		187.125	0.0192159
		187.16	0.0193422
		187.195	0.01947
		187.23	0.0195993
		187.265	0.0197302
		187.3	0.0198626
		187.335	0.0199966
		187.37	0.0201322
		187.405	0.0202693
		187.44	0.0204081
		187.475	0.0205485
		187.51	0.0206905
		187.545	0.0208341
		187.58	0.0209794
		187.615	0.0211263
		187.65	0.0212749
		187.685	0.0214252
		187.72	0.0215771
		187.755	0.0217308
		187.79	0.0218861
		187.825	0.0220431
		187.86	0.0222019
		187.895	0.0223623
		187.93	0.0225245
		187.965	0.0226884
		188	0.0228541
		188.035	0.0230215
		188.07	0.0231906
		188.105	0.0233614
		188.14	0.023534
		188.175	0.0237084
		188.21	0.0238845
		188.245	0.0240623
		188.28	0.0242419
		188.315	0.0244232
		188.35	0.0246063
		188.385	0.0247911
		188.42	0.0249776
		188.455	0.0251659
		188.49	0.0253559
		188.525	0.0255477
		188.56	0.0257411
		188.595	0.0259363
		188.63	0.0261332
		188.665	0.0263318
		188.7	0.026532
		188.735	0.026734
		188.77	0.0269376
		188.805	0.0271428
		188.84	0.0273497
		188.875	0.0275583
		188.91	0.0277684
		188.945	0.0279802
		188.98	0.0281935
		189.015	0.0284084
		189.05	0.0286249
		189.085	0.0288429
		189.12	0.0290624
		189.155	0.0292834
		189.19	0.0295059
		189.225	0.0297299
		189.26	0.0299553
		189.295	0.0301821
		189.33	0.0304102
		189.365	0.0306398
		189.4	0.0308706
		189.435	0.0311028
		189.47	0.0313362
		189.505	0.0315709
		189.54	0.0318069
		189.575	0.032044
		189.61	0.0322823
		189.645	0.0325217
		189.68	0.0327622
		189.715	0.0330037
		189.75	0.0332463
		189.785	0.0334899
		189.82	0.0337344
		189.855	0.0339798
		189.89	0.0342262
		189.925	0.0344733
		189.96	0.0347213
		189.995	0.03497
		190.03	0.0352195
		190.065	0.0354697
		190.1	0.0357204
		190.135	0.0359718
		190.17	0.0362238
		190.205	0.0364762
		190.24	0.0367291
		190.275	0.0369825
		190.31	0.0372362
		190.345	0.0374903
		190.38	0.0377446
		190.415	0.0379992
		190.45	0.038254
		190.485	0.0385089
		190.52	0.0387639
		190.555	0.039019
		190.59	0.0392741
		190.625	0.0395292
		190.66	0.0397841
		190.695	0.040039
		190.73	0.0402936
		190.765	0.040548
		190.8	0.0408021
		190.835	0.0410559
		190.87	0.0413093
		190.905	0.0415623
		190.94	0.0418148
		190.975	0.0420668
		191.01	0.0423182
		191.045	0.042569
		191.08	0.0428191
		191.115	0.0430685
		191.15	0.0433172
		191.185	0.043565
		191.22	0.043812
		191.255	0.044058
		191.29	0.0443032
		191.325	0.0445473
		191.36	0.0447904
		191.395	0.0450325
		191.43	0.0452734
		191.465	0.0455131
		191.5	0.0457516
		191.535	0.0459889
		191.57	0.0462249
		191.605	0.0464596
		191.64	0.0466929
		191.675	0.0469248
		191.71	0.0471552
		191.745	0.0473842
		191.78	0.0476116
		191.815	0.0478375
		191.85	0.0480618
		191.885	0.0482845
		191.92	0.0485056
		191.955	0.0487249
		191.99	0.0489425
		192.025	0.0491584
		192.06	0.0493725
		192.095	0.0495848
		192.13	0.0497953
		192.165	0.0500039
		192.2	0.0502106
		192.235	0.0504154
		192.27	0.0506183
		192.305	0.0508192
		192.34	0.0510181
		192.375	0.051215
		192.41	0.0514099
		192.445	0.0516028
		192.48	0.0517936
		192.515	0.0519823
		192.55	0.052169
		192.585	0.0523535
		192.62	0.0525359
		192.655	0.0527162
		192.69	0.0528943
		192.725	0.0530703
		192.76	0.053244
		192.795	0.0534156
		192.83	0.053585
		192.865	0.0537522
		192.9	0.0539172
		192.935	0.0540799
		192.97	0.0542405
		193.005	0.0543988
		193.04	0.0545548
		193.075	0.0547086
		193.11	0.0548601
		193.145	0.0550094
		193.18	0.0551564
		193.215	0.0553012
		193.25	0.0554436
		193.285	0.0555839
		193.32	0.0557218
		193.355	0.0558575
		193.39	0.0559908
		193.425	0.056122
		193.46	0.0562508
		193.495	0.0563774
		193.53	0.0565016
		193.565	0.0566237
		193.6	0.0567434
		193.635	0.0568608
		193.67	0.056976
		193.705	0.0570889
		193.74	0.0571996
		193.775	0.057308
		193.81	0.0574141
		193.845	0.0575179
		193.88	0.0576195
		193.915	0.0577188
		193.95	0.0578159
		193.985	0.0579107
		194.02	0.0580032
		194.055	0.0580935
		194.09	0.0581816
		194.125	0.0582674
		194.16	0.058351
		194.195	0.0584323
		194.23	0.0585114
		194.265	0.0585882
		194.3	0.0586628
		194.335	0.0587352
		194.37	0.0588053
		194.405	0.0588732
		194.44	0.0589389
		194.475	0.0590024
		194.51	0.0590636
		194.545	0.0591226
		194.58	0.0591794
		194.615	0.059234
		194.65	0.0592863
		194.685	0.0593364
		194.72	0.0593843
		194.755	0.05943
		194.79	0.0594735
		194.825	0.0595148
		194.86	0.0595539
		194.895	0.0595907
		194.93	0.0596254
		194.965	0.0596578
		195	0.0596881
		195.035	0.0597161
		195.07	0.0597419
		195.105	0.0597655
		195.14	0.0597869
		195.175	0.0598061
		195.21	0.0598231
		195.245	0.059838
		195.28	0.0598506
		195.315	0.059861
		195.35	0.0598692
		195.385	0.0598752
		195.42	0.0598791
		195.455	0.0598807
		195.49	0.0598802
		195.525	0.0598775
		195.56	0.0598726
		195.595	0.0598655
		195.63	0.0598562
		195.665	0.0598448
		195.7	0.0598312
		195.735	0.0598154
		195.77	0.0597974
		195.805	0.0597773
		195.84	0.0597551
		195.875	0.0597307
		195.91	0.0597041
		195.945	0.0596754
		195.98	0.0596446
		196.015	0.0596116
		196.05	0.0595766
		196.085	0.0595394
		196.12	0.0595001
		196.155	0.0594587
		196.19	0.0594152
		196.225	0.0593696
		196.26	0.059322
		196.295	0.0592723
		196.33	0.0592205
		196.365	0.0591668
		196.4	0.0591109
		196.435	0.0590531
		196.47	0.0589933
		196.505	0.0589314
		196.54	0.0588676
		196.575	0.0588018
		196.61	0.0587341
		196.645	0.0586645
		196.68	0.0585929
		196.715	0.0585194
		196.75	0.0584441
		196.785	0.0583669
		196.82	0.0582878
		196.855	0.0582069
		196.89	0.0581243
		196.925	0.0580398
		196.96	0.0579536
		196.995	0.0578656
		197.03	0.0577759
		197.065	0.0576846
		197.1	0.0575916
		197.135	0.0574969
		197.17	0.0574006
		197.205	0.0573028
		197.24	0.0572034
		197.275	0.0571025
		197.31	0.0570001
		197.345	0.0568962
		197.38	0.0567909
		197.415	0.0566843
		197.45	0.0565762
		197.485	0.0564669
		197.52	0.0563562
		197.555	0.0562443
		197.59	0.0561312
		197.625	0.0560169
		197.66	0.0559015
		197.695	0.0557851
		197.73	0.0556675
		197.765	0.055549
		197.8	0.0554295
		197.835	0.0553091
		197.87	0.0551878
		197.905	0.0550658
		197.94	0.0549429
		197.975	0.0548193
		198.01	0.0546951
		198.045	0.0545702
		198.08	0.0544447
		198.115	0.0543188
		198.15	0.0541923
		198.185	0.0540655
		198.22	0.0539383
		198.255	0.0538108
		198.29	0.053683
		198.325	0.053555
		198.36	0.0534269
		198.395	0.0532987
		198.43	0.0531704
		198.465	0.0530422
		198.5	0.052914
		198.535	0.0527859
		198.57	0.0526581
		198.605	0.0525304
		198.64	0.0524031
		198.675	0.052276
		198.71	0.0521494
		198.745	0.0520232
		198.78	0.0518974
		198.815	0.0517722
		198.85	0.0516476
		198.885	0.0515236
		198.92	0.0514002
		198.955	0.0512775
		198.99	0.0511556
		199.025	0.0510344
		199.06	0.0509141
		199.095	0.0507945
		199.13	0.0506759
		199.165	0.0505581
		199.2	0.0504412
		199.235	0.0503253
		199.27	0.0502102
		199.305	0.0500962
		199.34	0.0499831
		199.375	0.049871
		199.41	0.0497598
		199.445	0.0496496
		199.48	0.0495403
		199.515	0.049432
		199.55	0.0493247
		199.585	0.0492182
		199.62	0.0491126
		199.655	0.0490079
		199.69	0.0489041
		199.725	0.048801
		199.76	0.0486986
		199.795	0.048597
		199.83	0.0484961
		199.865	0.0483957
		199.9	0.0482959
		199.935	0.0481966
		199.97	0.0480977
		200.005	0.0479991
		200.04	0.0479009
		200.075	0.0478028
		200.11	0.0477049
		200.145	0.047607
		200.18	0.047509
		200.215	0.047411
		200.25	0.0473127
		200.285	0.0472141
		200.32	0.0471151
		200.355	0.0470156
		200.39	0.0469155
		200.425	0.0468147
		200.46	0.0467132
		200.495	0.0466107
		200.53	0.0465072
		200.565	0.0464026
		200.6	0.0462968
		200.635	0.0461897
		200.67	0.0460812
		200.705	0.0459712
		200.74	0.0458596
		200.775	0.0457464
		200.81	0.0456314
		200.845	0.0455145
		200.88	0.0453956
		200.915	0.0452748
		200.95	0.0451518
		200.985	0.0450266
		201.02	0.0448992
		201.055	0.0447695
		201.09	0.0446374
		201.125	0.0445029
		201.16	0.0443658
		201.195	0.0442263
		201.23	0.0440842
		201.265	0.0439394
		201.3	0.0437921
		201.335	0.043642
		201.37	0.0434893
		201.405	0.0433339
		201.44	0.0431758
		201.475	0.043015
		201.51	0.0428515
		201.545	0.0426854
		201.58	0.0425165
		201.615	0.0423451
		201.65	0.042171
		201.685	0.0419944
		201.72	0.0418152
		201.755	0.0416335
		201.79	0.0414494
		201.825	0.0412629
		201.86	0.0410741
		201.895	0.040883
		201.93	0.0406898
		201.965	0.0404944
		202	0.040297
		202.035	0.0400977
		202.07	0.0398964
		202.105	0.0396934
		202.14	0.0394887
		202.175	0.0392824
		202.21	0.0390746
		202.245	0.0388654
		202.28	0.0386548
		202.315	0.0384431
		202.35	0.0382302
		202.385	0.0380163
		202.42	0.0378015
		202.455	0.0375858
		202.49	0.0373695
		202.525	0.0371525
		202.56	0.036935
		202.595	0.036717
		202.63	0.0364987
		202.665	0.0362802
		202.7	0.0360615
		202.735	0.0358428
		202.77	0.035624
		202.805	0.0354054
		202.84	0.035187
		202.875	0.0349688
		202.91	0.0347509
		202.945	0.0345335
		202.98	0.0343165
		203.015	0.0341001
		203.05	0.0338843
		203.085	0.0336691
		203.12	0.0334547
		203.155	0.033241
		203.19	0.0330281
		203.225	0.0328161
		203.26	0.032605
		203.295	0.0323948
		203.33	0.0321856
		203.365	0.0319773
		203.4	0.0317701
		203.435	0.031564
		203.47	0.0313589
		203.505	0.0311548
		203.54	0.0309519
		203.575	0.0307501
		203.61	0.0305494
		203.645	0.0303498
		203.68	0.0301513
		203.715	0.0299539
		203.75	0.0297576
		203.785	0.0295625
		203.82	0.0293684
		203.855	0.0291754
		203.89	0.0289835
		203.925	0.0287927
		203.96	0.028603
		203.995	0.0284142
		204.03	0.0282265
		204.065	0.0280398
		204.1	0.0278541
		204.135	0.0276694
		204.17	0.0274856
		204.205	0.0273027
		204.24	0.0271207
		204.275	0.0269396
		204.31	0.0267594
		204.345	0.02658
		204.38	0.0264015
		204.415	0.0262237
		204.45	0.0260468
		204.485	0.0258705
		204.52	0.025695
		204.555	0.0255203
		204.59	0.0253462
		204.625	0.0251728
		204.66	0.0250001
		204.695	0.024828
		204.73	0.0246565
		204.765	0.0244856
		204.8	0.0243153
		204.835	0.0241456
		204.87	0.0239765
		204.905	0.0238079
		204.94	0.0236399
		204.975	0.0234723
		205.01	0.0233053
		205.045	0.0231388
		205.08	0.0229728
		205.115	0.0228073
		205.15	0.0226423
		205.185	0.0224778
		205.22	0.0223137
		205.255	0.0221501
		205.29	0.021987
		205.325	0.0218243
		205.36	0.0216621
		205.395	0.0215003
		205.43	0.021339
		205.465	0.0211782
		205.5	0.0210179
		205.535	0.020858
		205.57	0.0206985
		205.605	0.0205396
		205.64	0.0203811
		205.675	0.0202231
		205.71	0.0200656
		205.745	0.0199085
		205.78	0.019752
		205.815	0.019596
		205.85	0.0194404
		205.885	0.0192854
		205.92	0.019131
		205.955	0.018977
		205.99	0.0188236
		206.025	0.0186707
		206.06	0.0185184
		206.095	0.0183667
		206.13	0.0182155
		206.165	0.018065
		206.2	0.017915
		206.235	0.0177656
		206.27	0.0176168
		206.305	0.0174687
		206.34	0.0173211
		206.375	0.0171743
		206.41	0.017028
		206.445	0.0168825
		206.48	0.0167376
		206.515	0.0165934
		206.55	0.0164498
		206.585	0.016307
		206.62	0.0161649
		206.655	0.0160235
		206.69	0.0158828
		206.725	0.0157428
		206.76	0.0156036
		206.795	0.0154652
		206.83	0.0153275
		206.865	0.0151905
		206.9	0.0150544
		206.935	0.014919
		206.97	0.0147844
		207.005	0.0146506
		207.04	0.0145176
		207.075	0.0143854
		207.11	0.0142541
		207.145	0.0141235
		207.18	0.0139938
		207.215	0.013865
		207.25	0.0137369
		207.285	0.0136097
		207.32	0.0134834
		207.355	0.0133579
		207.39	0.0132333
		207.425	0.0131096
		207.46	0.0129866
		207.495	0.0128646
		207.53	0.0127435
		207.565	0.0126232
		207.6	0.0125038
		207.635	0.0123853
		207.67	0.0122677
		207.705	0.012151
		207.74	0.0120351
		207.775	0.0119202
		207.81	0.0118061
		207.845	0.0116929
		207.88	0.0115806
		207.915	0.0114692
		207.95	0.0113587
		207.985	0.0112491
		208.02	0.0111404
		208.055	0.0110326
		208.09	0.0109257
		208.125	0.0108196
		208.16	0.0107145
		208.195	0.0106102
		208.23	0.0105068
		208.265	0.0104043
		208.3	0.0103027
		208.335	0.0102019
		208.37	0.0101021
		208.405	0.0100031
		208.44	0.00990493
		208.475	0.00980767
		208.51	0.00971127
		208.545	0.00961574
		208.58	0.00952106
		208.615	0.00942723
		208.65	0.00933425
		208.685	0.00924211
		208.72	0.00915082
		208.755	0.00906035
		208.79	0.00897071
		208.825	0.0088819
		208.86	0.00879392
		208.895	0.00870675
		208.93	0.00862039
		208.965	0.00853484
		209	0.00845009
		209.035	0.00836613
		209.07	0.00828296
		209.105	0.00820058
		209.14	0.00811897
		209.175	0.00803814
		209.21	0.00795808
		209.245	0.00787877
		209.28	0.00780022
		209.315	0.00772242
		209.35	0.00764536
		209.385	0.00756904
		209.42	0.00749345
		209.455	0.00741859
		209.49	0.00734444
		209.525	0.00727101
		209.56	0.00719827
		209.595	0.00712624
		209.63	0.0070549
		209.665	0.00698426
		209.7	0.00691429
		209.735	0.006845
		209.77	0.00677638
		209.805	0.00670841
		209.84	0.00664111
		209.875	0.00657445
		209.91	0.00650844
		209.945	0.00644306
		209.98	0.00637832
		210.015	0.00631419
		210.05	0.00625068
		210.085	0.00618778
		210.12	0.0061255
		210.155	0.00606381
		210.19	0.00600272
		210.225	0.00594221
		210.26	0.00588229
		210.295	0.00582294
		210.33	0.00576416
		210.365	0.00570594
		210.4	0.00564828
		210.435	0.00559117
		210.47	0.00553461
		210.505	0.00547859
		210.54	0.0054231
		210.575	0.00536814
		210.61	0.00531369
		210.645	0.00525976
		210.68	0.00520636
		210.715	0.00515346
		210.75	0.00510107
		210.785	0.00504917
		210.82	0.00499774
		210.855	0.00494681
		210.89	0.00489637
		210.925	0.0048464
		210.96	0.00479689
		210.995	0.00474787
		211.03	0.0046993
		211.065	0.00465117
		211.1	0.0046035
		211.135	0.00455629
		211.17	0.0045095
		211.205	0.00446317
		211.24	0.00441727
		211.275	0.00437179
		211.31	0.00432675
		211.345	0.00428212
		211.38	0.0042379
		211.415	0.0041941
		211.45	0.0041507
		211.485	0.00410771
		211.52	0.00406511
		211.555	0.00402291
		211.59	0.0039811
		211.625	0.00393968
		211.66	0.00389864
		211.695	0.00385798
		211.73	0.0038177
		211.765	0.00377779
		211.8	0.00373825
		211.835	0.00369907
		211.87	0.00366025
		211.905	0.00362179
		211.94	0.00358369
		211.975	0.00354593
		212.01	0.00350852
		212.045	0.00347147
		212.08	0.00343475
		212.115	0.00339837
		212.15	0.00336233
		212.185	0.00332661
		212.22	0.00329123
		212.255	0.00325618
		212.29	0.00322145
		212.325	0.00318704
		212.36	0.00315295
		212.395	0.00311918
		212.43	0.00308572
		212.465	0.00305256
		212.5	0.00301972
		212.535	0.00298717
		212.57	0.00295493
		212.605	0.00292299
		212.64	0.00289135
		212.675	0.00285999
		212.71	0.00282893
		212.745	0.00279817
		212.78	0.00276769
		212.815	0.00273749
		212.85	0.00270758
		212.885	0.00267795
		212.92	0.00264859
		212.955	0.00261952
		212.99	0.00259072
		213.025	0.00256218
		213.06	0.00253392
		213.095	0.00250593
		213.13	0.0024782
		213.165	0.00245072
		213.2	0.00242351
		213.235	0.00239657
		213.27	0.00236987
		213.305	0.00234344
		213.34	0.00231726
		213.375	0.00229133
		213.41	0.00226564
		213.445	0.00224021
		213.48	0.00221502
		213.515	0.00219007
		213.55	0.00216536
		213.585	0.0021409
		213.62	0.00211667
		213.655	0.00209267
		213.69	0.00206892
		213.725	0.00204539
		213.76	0.00202209
		213.795	0.00199903
		213.83	0.00197619
		213.865	0.00195357
		213.9	0.00193118
		213.935	0.00190901
		213.97	0.00188706
		214.005	0.00186533
		214.04	0.00184382
		214.075	0.00182252
		214.11	0.00180144
		214.145	0.00178057
		214.18	0.00175991
		214.215	0.00173943
		214.25	0.00171918
		214.285	0.00169913
		214.32	0.0016793
		214.355	0.00165966
		214.39	0.00164023
		214.425	0.001621
		214.46	0.00160196
		214.495	0.00158313
		214.53	0.00156448
		214.565	0.00154603
		214.6	0.00152778
		214.635	0.00150971
		214.67	0.00149182
		214.705	0.00147413
		214.74	0.00145662
		214.775	0.0014393
		214.81	0.00142217
		214.845	0.0014052
		214.88	0.00138842
		214.915	0.00137182
		214.95	0.0013554
		214.985	0.00133916
		215.02	0.00132308
		215.055	0.00130719
		215.09	0.00129146
		215.125	0.0012759
		215.16	0.00126051
		215.195	0.00124529
		215.23	0.00123023
		215.265	0.00121534
		215.3	0.00120061
		215.335	0.00118604
		215.37	0.00117163
		215.405	0.00115738
		215.44	0.00114329
		215.475	0.00112936
		215.51	0.00111558
		215.545	0.00110195
		215.58	0.00108846
		215.615	0.00107514
		215.65	0.00106196
		215.685	0.00104893
		215.72	0.00103604
		215.755	0.00102331
		215.79	0.00101072
		215.825	0.000998268
		215.86	0.000985962
		215.895	0.000973796
		215.93	0.000961769
		215.965	0.00094988
		216	0.000938127
		216.035	0.000926509
		216.07	0.000915013
		216.105	0.00090365
		216.14	0.000892431
		216.175	0.000881343
		216.21	0.000870371
		216.245	0.000859539
		216.28	0.000848835
		216.315	0.000838255
		216.35	0.0008278
		216.385	0.000817467
		216.42	0.000807243
		216.455	0.000797153
		216.49	0.000787182
		216.525	0.000777329
		216.56	0.000767593
		216.595	0.000757972
		216.63	0.000748466
		216.665	0.000739074
		216.7	0.000729794
		216.735	0.000720625
		216.77	0.000711566
		216.805	0.000702615
		216.84	0.00069376
		216.875	0.000685025
		216.91	0.000676395
		216.945	0.00066787
		216.98	0.000659448
		217.015	0.000651116
		217.05	0.000642898
		217.085	0.00063478
		217.12	0.000626762
		217.155	0.000618841
		217.19	0.000611017
		217.225	0.000603277
		217.26	0.000595645
		217.295	0.000588107
		217.33	0.000580661
		217.365	0.000573308
		217.4	0.000566045
		217.435	0.000558872
		217.47	0.000551788
		217.505	0.000544792
		217.54	0.000537883
		217.575	0.00053106
		217.61	0.000524322
		217.645	0.000517668
		217.68	0.000511097
		217.715	0.000504608
		217.75	0.000498201
		217.785	0.000491874
		217.82	0.000485626
		217.855	0.000479457
		217.89	0.000473365
		217.925	0.000467351
		217.96	0.000461412
		217.995	0.000455547
		218.03	0.000449758
		218.065	0.000444041
		218.1	0.000438396
		218.135	0.000432824
		218.17	0.000427321
		218.205	0.000421889
		218.24	0.000416526
		218.275	0.000411231
		218.31	0.000406003
		218.345	0.000400842
		218.38	0.000395747
		218.415	0.000390716
		218.45	0.000385738
		218.485	0.000380835
		218.52	0.000375996
		218.555	0.000371218
		218.59	0.000366502
		218.625	0.000361846
		218.66	0.000357249
		218.695	0.000352712
		218.73	0.000348232
		218.765	0.000343785
		218.8	0.000339409
		218.835	0.000335101
		218.87	0.000330849
		218.905	0.000326652
		218.94	0.000322508
		218.975	0.000318418
		219.01	0.00031438
		219.045	0.000310382
		219.08	0.000306448
		219.115	0.000302565
		219.15	0.000298731
		219.185	0.000294935
		219.22	0.0002912
		219.255	0.000287514
		219.29	0.000283862
		219.325	0.00028027
		219.36	0.000276725
		219.395	0.000273226
		219.43	0.000269771
		219.465	0.000266361
		219.5	0.000262995
		219.535	0.000259673
		219.57	0.000256393
		219.605	0.000253155
		219.64	0.00024996
		219.675	0.000246805
		219.71	0.000243691
		219.745	0.000240618
		219.78	0.000237584
		219.815	0.000234589
		219.85	0.000231632
		219.885	0.000228714
		219.92	0.000225833
		219.955	0.00022299
		219.99	0.000220183
		220.025	0.000217399
		220.06	0.000214665
		220.095	0.000211965
		220.13	0.000209288
		220.165	0.000206658
		220.2	0.000204062
		220.235	0.000201499
		220.27	0.000198969
		220.305	0.000196472
		220.34	0.000194007
		220.375	0.000191573
		220.41	0.00018917
		220.445	0.000186799
		220.48	0.000184457
		220.515	0.000182133
		220.55	0.000179852
		220.585	0.0001776
		220.62	0.000175376
		220.655	0.000173181
		220.69	0.000171014
		220.725	0.000168875
		220.76	0.000166763
		220.795	0.000164678
		220.83	0.000162607
		220.865	0.000160575
		220.9	0.000158569
		220.935	0.000156589
		220.97	0.000154633
		221.005	0.000152703
		221.04	0.000150797
		221.075	0.000148915
		221.11	0.000147058
		221.145	0.000145223
		221.18	0.000143412
		221.215	0.000141624
		221.25	0.000139859
		221.285	0.000138115
		221.32	0.000136394
		221.355	0.000134695
		221.39	0.000133017
		221.425	0.00013136
		221.46	0.000129724
		221.495	0.000128108
		221.53	0.000126513
		221.565	0.000124938
		221.6	0.000123383
		221.635	0.000121847
		221.67	0.000120331
		221.705	0.000118834
		221.74	0.000117355
		221.775	0.000115895
		221.81	0.00011444
		221.845	0.000113016
		221.88	0.000111611
		221.915	0.000110223
		221.95	0.000108852
		221.985	0.000107498
		222.02	0.000106161
		222.055	0.000104841
		222.09	0.000103537
		222.125	0.000102249
		222.16	0.000100978
		222.195	9.97218e-05
		222.23	9.84815e-05
		222.265	9.72565e-05
		222.3	9.60467e-05
		222.335	9.48518e-05
		222.37	9.36717e-05
		222.405	9.25062e-05
		222.44	9.13551e-05
		222.475	9.02181e-05
		222.51	8.90952e-05
		222.545	8.79861e-05
		222.58	8.68907e-05
		222.615	8.58087e-05
		222.65	8.474e-05
		222.685	8.36845e-05
		222.72	8.26419e-05
		222.755	8.16121e-05
		222.79	8.05949e-05
		222.825	7.95902e-05
		222.86	7.85978e-05
		222.895	7.76176e-05
		222.93	7.66493e-05
		222.965	7.56929e-05
		223	7.47481e-05
		223.035	7.38149e-05
		223.07	7.2893e-05
		223.105	7.19824e-05
		223.14	7.1083e-05
		223.175	7.01944e-05
		223.21	6.93167e-05
		223.245	6.84497e-05
		223.28	6.75802e-05
		223.315	6.67345e-05
		223.35	6.5899e-05
		223.385	6.50737e-05
		223.42	6.42584e-05
		223.455	6.3453e-05
		223.49	6.26574e-05
		223.525	6.18714e-05
		223.56	6.10949e-05
		223.595	6.03278e-05
		223.63	5.957e-05
		223.665	5.88214e-05
		223.7	5.80818e-05
		223.735	5.73512e-05
		223.77	5.66166e-05
		223.805	5.59039e-05
		223.84	5.51999e-05
		223.875	5.45043e-05
		223.91	5.38172e-05
		223.945	5.31383e-05
		223.98	5.24676e-05
		224.015	5.1805e-05
		224.05	5.11377e-05
		224.085	5.04914e-05
		224.12	4.98528e-05
		224.155	4.92219e-05
		224.19	4.85986e-05
		224.225	4.79829e-05
		224.26	4.73745e-05
		224.295	4.67734e-05
		224.33	4.61796e-05
		224.365	4.55929e-05
		224.4	4.50133e-05
		224.435	4.44406e-05
		224.47	4.38749e-05
		224.505	4.33159e-05
		224.54	4.27637e-05
		224.575	4.22181e-05
		224.61	4.16791e-05
		224.645	4.11466e-05
		224.68	4.06205e-05
		224.715	4.01007e-05
		224.75	3.95871e-05
		224.785	3.90798e-05
		224.82	3.85786e-05
		224.855	3.80834e-05
		224.89	3.75941e-05
		224.925	3.71108e-05
		224.96	3.66333e-05
		224.995	3.61615e-05
		225.03	3.56954e-05
		225.065	3.5235e-05
		225.1	3.47801e-05
		225.135	3.43306e-05
		225.17	3.38867e-05
		225.205	3.3448e-05
		225.24	3.30147e-05
		225.275	3.25866e-05
		225.31	3.21637e-05
		225.345	3.17459e-05
		225.38	3.13331e-05
		225.415	3.09254e-05
		225.45	3.05225e-05
		225.485	3.01246e-05
		225.52	2.97315e-05
		225.555	2.93431e-05
		225.59	2.89595e-05
		225.625	2.85676e-05
		225.66	2.81936e-05
		225.695	2.78242e-05
		225.73	2.74593e-05
		225.765	2.70859e-05
		225.8	2.67302e-05
		225.835	2.63788e-05
		225.87	2.60317e-05
		225.905	2.56888e-05
		225.94	2.535e-05
		225.975	2.50154e-05
		226.01	2.46849e-05
		226.045	2.43584e-05
		226.08	2.40358e-05
		226.115	2.37172e-05
		226.15	2.34025e-05
		226.185	2.30916e-05
		226.22	2.27717e-05
		226.255	2.24689e-05
		226.29	2.21698e-05
		226.325	2.18743e-05
		226.36	2.15825e-05
		226.395	2.12942e-05
		226.43	2.10094e-05
		226.465	2.07282e-05
		226.5	2.04504e-05
		226.535	2.0176e-05
		226.57	1.9905e-05
		226.605	1.96373e-05
		226.64	1.93729e-05
		226.675	1.91117e-05
		226.71	1.88538e-05
		226.745	1.85991e-05
		226.78	1.83476e-05
		226.815	1.80991e-05
		226.85	1.78537e-05
		226.885	1.76114e-05
		226.92	1.73721e-05
		226.955	1.71357e-05
		226.99	1.69023e-05
		227.025	1.66718e-05
		227.06	1.64442e-05
		227.095	1.62195e-05
		227.13	1.59975e-05
		227.165	1.57783e-05
		227.2	1.55619e-05
		227.235	1.53481e-05
		227.27	1.51371e-05
		227.305	1.49287e-05
		227.34	1.47229e-05
		227.375	1.45198e-05
		227.41	1.43191e-05
		227.445	1.41211e-05
		227.48	1.39255e-05
		227.515	1.37324e-05
		227.55	1.35417e-05
		227.585	1.33535e-05
		227.62	1.31677e-05
		227.655	1.29842e-05
		227.69	1.2803e-05
		227.725	1.26242e-05
		227.76	1.24477e-05
		227.795	1.22734e-05
		227.83	1.21013e-05
		227.865	1.19314e-05
		227.9	1.17638e-05
		227.935	1.15982e-05
		227.97	1.14348e-05
		228.005	1.12735e-05
		228.04	1.11143e-05
		228.075	1.09572e-05
		228.11	1.0802e-05
		228.145	1.06489e-05
		228.18	1.04978e-05
		228.215	1.03486e-05
		228.25	1.02013e-05
		228.285	1.0056e-05
		228.32	9.91259e-06
		228.355	9.77103e-06
		228.39	9.63131e-06
		228.425	9.49342e-06
		228.46	9.35734e-06
		228.495	9.22304e-06
		228.53	9.0905e-06
		228.565	8.9471e-06
		228.6	8.81848e-06
		228.635	8.69154e-06
		228.67	8.56627e-06
		228.705	8.44264e-06
		228.74	8.32064e-06
		228.775	8.18749e-06
		228.81	8.0691e-06
		228.845	7.95227e-06
		228.88	7.83698e-06
		228.915	7.72321e-06
		228.95	7.61095e-06
		228.985	7.50016e-06
		229.02	7.39085e-06
		229.055	7.28299e-06
		229.09	7.17656e-06
		229.125	7.07155e-06
		229.16	6.95533e-06
		229.195	6.85352e-06
		229.23	6.75307e-06
		229.265	6.65395e-06
		229.3	6.54341e-06
		229.335	6.44727e-06
		229.37	6.35241e-06
		229.405	6.25882e-06
		229.44	6.16648e-06
		229.475	6.07538e-06
		229.51	5.9855e-06
		229.545	5.89683e-06
		229.58	5.80936e-06
		229.615	5.72306e-06
		229.65	5.63794e-06
		229.685	5.55396e-06
		229.72	5.47113e-06
		229.755	5.38942e-06
		229.79	5.30882e-06
		229.825	5.22932e-06
		229.86	5.1509e-06
		229.895	5.07356e-06
		229.93	4.99728e-06
		229.965	4.92204e-06
[truncated: 1 more rows]

## Sheet: PlotDat18
Source sheet	TO-19-16 UPb_All_Integrations	0.244	0.03541	0	0	0.217708	0.0315113	0.272149	0.0355647	0.427194	0.0493079	0.439656	0.0491189	0.411716	0.0494825	0.400716	0.0495015	0.41185	0.049741	0.401164	0.0499696	0.420164	0.0501639	0.429641	0.0502319	0.426059	0.0500384	0.416627	0.0501857	0.41994	0.0500799	0.423507	0.050706	0.400403	0.0505146	0.409522	0.0507394	0.413164	0.0508365	0.439895	0.0512105	0.409403	0.0512688	0.44985	0.0515389	0.423074	0.0509634	0.40097	0.0514447
Plot name	Concordia18	0.366	0.049	0.0787105	0.0120055	0.482812	0.0640155	0.271007	0.0358553	0.424712	0.0498053	0.436631	0.0495611	0.410225	0.0499472	0.399229	0.0498463	0.409667	0.0501044	0.399573	0.0504612	0.418575	0.0505952	0.427061	0.0508744	0.424273	0.0505831	0.414493	0.0507273	0.418402	0.0505589	0.42162	0.0512036	0.39832	0.0508933	0.407189	0.0513814	0.411576	0.0512083	0.436373	0.0517333	0.407317	0.0516899	0.447663	0.0520832	0.420843	0.0514777	0.398536	0.0518803
Plot Type	1	0.365	0.049	0.163616	0.0241552	0.805631	0.097544	0.267677	0.0361097	0.417474	0.0502375	0.427803	0.0499578	0.405881	0.0503514	0.394888	0.050163	0.403299	0.0504188	0.394938	0.0508831	0.413941	0.0509702	0.419534	0.051446	0.419062	0.0510725	0.408269	0.0512101	0.413915	0.0509926	0.416118	0.0516361	0.392242	0.0512401	0.400385	0.0519519	0.406944	0.0515389	0.426096	0.0521805	0.401237	0.052047	0.441291	0.0525398	0.41433	0.0519452	0.391442	0.0522365
1st free col	169	0.375	0.0492	0.255205	0.0364508	1.19873	0.132129	0.262429	0.0363075	0.406066	0.0505694	0.413888	0.0502769	0.399034	0.0506622	0.388044	0.0504259	0.39326	0.0506588	0.387634	0.051201	0.406639	0.0512586	0.40767	0.0519005	0.410848	0.0514669	0.398458	0.0515948	0.406843	0.0513459	0.407447	0.0519684	0.382661	0.0515269	0.389662	0.0524048	0.399643	0.0518016	0.409897	0.0525159	0.391653	0.0523112	0.431249	0.0528716	0.404064	0.0523281	0.380261	0.0524845
Sigma Level	2	0.364	0.0495	0.354003	0.0488939	1.67741	0.167804	0.255688	0.0364325	0.391412	0.0507742	0.396011	0.0504926	0.390241	0.0508546	0.379252	0.0506139	0.380365	0.0508049	0.378254	0.0513892	0.39726	0.0514368	0.39243	0.052201	0.400297	0.0517343	0.385856	0.0518503	0.397758	0.0515901	0.396309	0.0521737	0.370353	0.0517306	0.375887	0.0527034	0.390265	0.051975	0.389089	0.0527122	0.379343	0.052461	0.418352	0.0530518	0.390877	0.0525952	0.365899	0.052604
Absolute Errs	TRUE	0.358	0.0495	0.460577	0.0614865	2.2603	0.204603	0.248	0.0364748	0.3747	0.0508352	0.375622	0.0505874	0.380212	0.050913	0.369225	0.0507116	0.365658	0.0508453	0.367557	0.0514325	0.386563	0.0514906	0.375049	0.0523232	0.388264	0.0518531	0.371483	0.051956	0.387396	0.0517055	0.383607	0.0522353	0.356315	0.0518346	0.360177	0.0528235	0.379569	0.0520451	0.365357	0.0527536	0.365304	0.0524844	0.403644	0.0530658	0.375836	0.0527251	0.34952	0.0525855
Symbol Type	1	0.362	0.0496	0.57554	0.0742302	2.97009	0.242562	0.239988	0.0364307	0.357282	0.0507476	0.354373	0.0505535	0.369762	0.0508326	0.358775	0.0507112	0.35033	0.0507767	0.35641	0.0513273	0.375416	0.0514155	0.356935	0.0522572	0.375724	0.0518137	0.356504	0.0519031	0.376597	0.0516828	0.37037	0.0521482	0.341684	0.0518304	0.343804	0.0527554	0.368422	0.0520063	0.340625	0.0526368	0.350674	0.0523795	0.388316	0.0529125	0.36016	0.052707	0.332451	0.0524305
Inverse Plot	FALSE	0.381	0.0499	0.699551	0.0871269	3.83441	0.281716	0.232301	0.036304	0.340571	0.0505183	0.333984	0.0503938	0.359736	0.0506199	0.348747	0.0506126	0.335624	0.0506047	0.345715	0.0510822	0.364721	0.0512176	0.339555	0.0520083	0.363691	0.0516193	0.342132	0.0516961	0.366236	0.0515237	0.357669	0.0519194	0.327646	0.0517185	0.328096	0.0525045	0.357726	0.0518616	0.316894	0.0523711	0.336636	0.0521547	0.373611	0.0526041	0.345119	0.0525426	0.316074	0.0521514
Color Plot	TRUE	0.366	0.05	0.833324	0.100178	4.8869	0.322105	0.225562	0.0361048	0.32592	0.0501661	0.316109	0.0501212	0.350946	0.0502922	0.339956	0.0504239	0.322731	0.0503432	0.33634	0.050717	0.355345	0.050913	0.324317	0.0515968	0.353143	0.0512856	0.329532	0.0513517	0.357152	0.0512412	0.346535	0.0515676	0.315338	0.0515078	0.314324	0.0520913	0.34835	0.0516228	0.296089	0.0519782	0.32433	0.0518282	0.36072	0.0521659	0.331932	0.0522451	0.301717	0.051771
3D plot	FALSE	0.382	0.0499	0.977626	0.113387	6.16853	0.363766	0.220316	0.0358494	0.314516	0.0497194	0.302194	0.0497577	0.344105	0.049876	0.333112	0.0501604	0.312695	0.0500134	0.329044	0.0502613	0.348047	0.0505263	0.312457	0.0510558	0.344932	0.0508396	0.319724	0.0508977	0.350081	0.0508581	0.337869	0.0511212	0.305757	0.0512155	0.303604	0.0515491	0.341051	0.0513093	0.279894	0.0514898	0.314751	0.0514265	0.350687	0.0516332	0.321667	0.0518386	0.290542	0.05132
Linear	FALSE	0.364	0.05	1.13329	0.126754	7.72917	0.40674	0.21699	0.0355583	0.307283	0.0492144	0.293367	0.0493329	0.339767	0.049405	0.328771	0.0498433	0.306329	0.0496419	0.324418	0.049752	0.343419	0.0500889	0.304934	0.0504293	0.339724	0.0503175	0.313503	0.0503711	0.345596	0.0504055	0.332373	0.0506164	0.299679	0.0508652	0.296805	0.0509219	0.336421	0.0509464	0.269622	0.0509455	0.308676	0.0509822	0.344325	0.0510491	0.315156	0.0513561	0.283455	0.050835
Data Range	V223:Z302	0.382	0.05	1.3012	0.140281	IsoLine	IsoLine	0.215851	0.0352553	0.304806	0.0486921	0.290344	0.0488811	0.338284	0.0489175	0.327284	0.0494985	0.30415	0.049259	0.322836	0.0492304	0.341836	0.0496361	0.302359	0.0497681	0.337941	0.0497616	0.311373	0.0498143	0.34406	0.0499201	0.330493	0.050094	0.297597	0.0504854	0.294478	0.0502606	0.334836	0.0505635	0.266105	0.0503895	0.306597	0.0505312	0.34215	0.0504611	0.312926	0.0508366	0.28103	0.0503553
Filled Symbols	FALSE	0.377	0.0504	1.48233	0.153971			0.216993	0.0349647	0.307288	0.0481947	0.293369	0.0484389	0.339775	0.0484528	0.328771	0.0491537	0.306333	0.0488956	0.324427	0.0487388	0.343425	0.0492048	0.304939	0.0491256	0.339727	0.0492169	0.313507	0.0492727	0.345598	0.0494411	0.33238	0.0495964	0.29968	0.0501067	0.296811	0.0496186	0.336424	0.0501917	0.269627	0.0498667	0.308683	0.0501101	0.344337	0.0499168	0.315157	0.0503223	0.283464	0.0499197
ConcAge	FALSE	0.349	0.0505	1.67771	0.167825			0.220323	0.0347103	0.314526	0.0477625	0.302197	0.0480422	0.344119	0.0480486	0.333112	0.048837	0.312701	0.0485812	0.329062	0.0483169	0.348059	0.0488298	0.312466	0.048554	0.344938	0.0487275	0.319731	0.0487899	0.350085	0.0490074	0.337882	0.0491639	0.305758	0.0497599	0.303615	0.0490481	0.341056	0.0498611	0.279904	0.0494195	0.314763	0.049753	0.350709	0.0494602	0.32167	0.0498548	0.290558	0.0495635
ConcSwap	FALSE	0.352	0.0505	1.88847	0.181845			0.225571	0.0345125	0.325934	0.0474306	0.316112	0.0477231	0.350966	0.0477378	0.339956	0.0485741	0.32274	0.0483412	0.336366	0.047999	0.355361	0.0485414	0.32433	0.0480995	0.353152	0.0483331	0.329542	0.0484052	0.357157	0.0486541	0.346553	0.0488316	0.315339	0.0494731	0.314338	0.0485952	0.348357	0.0495984	0.296103	0.0490841	0.324347	0.0494888	0.360751	0.0491284	0.331936	0.0494719	0.301739	0.0493155
1st Symbol-row	1	0.374	0.0507	2.11583	0.196034			0.232312	0.0343875	0.340588	0.0472258	0.333989	0.0475074	0.359759	0.0475454	0.348748	0.0483861	0.335635	0.0481951	0.345746	0.0478108	0.36474	0.0483632	0.33957	0.047799	0.363703	0.0480657	0.342144	0.0481497	0.366242	0.0484099	0.357691	0.0486263	0.327647	0.0492694	0.328113	0.0482966	0.357735	0.049425	0.316911	0.0488878	0.336657	0.049339	0.373648	0.0489482	0.345123	0.0492048	0.316101	0.049196
		0.353	0.0508	2.36108	0.210393			0.24	0.0343452	0.3573	0.0471648	0.354378	0.0474126	0.369788	0.047487	0.358775	0.0482884	0.350342	0.0481547	0.356443	0.0477675	0.375437	0.0483094	0.356951	0.0476768	0.375736	0.0479469	0.356517	0.048044	0.376604	0.0482945	0.370393	0.0485647	0.341685	0.0491654	0.343823	0.0481765	0.368431	0.0493549	0.340643	0.0488464	0.350696	0.0493156	0.388356	0.0489342	0.360164	0.0490749	0.33248	0.0492145
		0.358	0.0509	2.62563	0.224924			0.248012	0.0343893	0.374718	0.0472524	0.375627	0.0474465	0.380238	0.0475674	0.369225	0.0482888	0.36567	0.0482233	0.36759	0.0478727	0.386584	0.0483845	0.375065	0.0477428	0.388276	0.0479863	0.371496	0.0480969	0.387403	0.0483172	0.38363	0.0486518	0.356316	0.0491696	0.360196	0.0482446	0.379578	0.0493937	0.365375	0.0489632	0.365326	0.0494205	0.403684	0.0490875	0.37584	0.049093	0.349549	0.0493695
		0.396	0.051	2.911	0.23963			0.255699	0.034516	0.391429	0.0474817	0.396016	0.0476062	0.390264	0.0477801	0.379253	0.0483874	0.380376	0.0483953	0.378285	0.0481178	0.397279	0.0485824	0.392445	0.0479917	0.400309	0.0481807	0.385868	0.0483039	0.397764	0.0484763	0.396331	0.0488806	0.370354	0.0492815	0.375904	0.0484955	0.390274	0.0495384	0.389106	0.0492289	0.379364	0.0496453	0.418389	0.0493959	0.390881	0.0492574	0.365926	0.0496486
		0.368	0.0509	3.21884	0.254512			0.262438	0.0347152	0.40608	0.0478339	0.413891	0.0478788	0.399054	0.0481078	0.388044	0.0485761	0.393269	0.0486568	0.38766	0.048483	0.406655	0.048887	0.407683	0.0484032	0.410857	0.0485144	0.398468	0.0486483	0.406848	0.0487588	0.407465	0.0492324	0.382662	0.0494922	0.389676	0.0489087	0.39965	0.0497772	0.409911	0.0496218	0.39167	0.0499718	0.43128	0.0498341	0.404068	0.0495549	0.380283	0.050029
		0.341	0.0509	3.55091	0.269574			0.267684	0.0349706	0.417484	0.0482806	0.427806	0.0482423	0.405895	0.048524	0.394888	0.0488396	0.403305	0.0489866	0.394956	0.0489387	0.413953	0.0492737	0.419543	0.0489442	0.419068	0.0489604	0.408276	0.0491023	0.413919	0.0491419	0.416131	0.0496788	0.392243	0.0497845	0.400396	0.0494509	0.406949	0.0500907	0.426106	0.0501102	0.401249	0.0503735	0.441313	0.0503668	0.414333	0.0499614	0.391458	0.05048
		0.405	0.051	3.90911	0.284815			0.27101	0.0352617	0.424717	0.0487856	0.436633	0.0486671	0.410233	0.048995	0.399229	0.0491567	0.409671	0.0493581	0.399582	0.049448	0.418581	0.0497111	0.427066	0.0495707	0.424276	0.0494825	0.414497	0.0496289	0.418404	0.0495945	0.421627	0.0501836	0.398321	0.0501348	0.407195	0.0500781	0.411579	0.0504536	0.436378	0.0506545	0.407324	0.0508178	0.447675	0.0509509	0.420844	0.0504439	0.398545	0.050965
		0.392	0.051	4.29551	0.30024			0.272149	0.0355647	0.427194	0.0493079	0.439656	0.0491189	0.411716	0.0494825	0.400716	0.0495015	0.41185	0.049741	0.401164	0.0499696	0.420164	0.0501639	0.429641	0.0502319	0.426059	0.0500384	0.416627	0.0501857	0.41994	0.0500799	0.423507	0.050706	0.400403	0.0505146	0.409522	0.0507394	0.413164	0.0508365	0.439895	0.0512105	0.409403	0.0512688	0.44985	0.0515389	0.423074	0.0509634	0.40097	0.0514447
		0.375	0.051	4.71232	0.31585
		0.358	0.051	5.16194	0.331648
		0.369	0.0511	5.64695	0.347635
		0.341	0.051	6.17014	0.363814
		0.383	0.0511	6.7345	0.380188
		0.383	0.0511	7.34329	0.396758
		0.385	0.0511	7.99999	0.413526
		0.379	0.0511	8	0.413527
		0.396	0.0512	IsoLine	IsoLine
		0.376	0.0513
		0.362	0.0513
		0.401	0.0513
		0.336	0.0516
		0.362	0.0515
		0.407	0.0515
		0.404	0.0516
		0.355	0.0516
		0.365	0.0516
		0.371	0.0516
		0.403	0.0517
		0.366	0.0519
		0.36	0.0519
		0.377	0.052
		0.368	0.052
		0.364	0.0521
		0.398	0.0521
		0.342	0.0523
		0.366	0.0522
		0.431	0.0524
		0.388	0.0523
		0.364	0.0523
		0.418	0.0524
		0.402	0.0525
		0.388	0.0526
		0.362	0.0527
		0.421	0.0526
		0.432	0.0528
		0.405	0.0528
		0.423	0.0528
		0.382	0.0529
		0.392	0.05297
		0.433	0.0531
		0.399	0.0531
		0.398	0.0531
		0.366	0.0532
		0.361	0.0532
		0.393	0.0534
		0.389	0.0535
		0.403	0.0535
		0.414	0.0536
		0.364	0.0539
		0.397	0.054
		0.356	0.0544
		0.442	0.0547
		0.391	0.0549
		4.041	0.2901
		5.86	0.3583
		IsoLine	IsoLine
[truncated: 118 more columns]

## Sheet: PlotDat19
Source sheet	TO-19-16 UPb_All_Integrations	0.244	0.03541	0.206425	0.03	0.193957	0.028316	0.272149	0.0355647	0.427194	0.0493079	0.439656	0.0491189	0.411716	0.0494825	0.400716	0.0495015	0.41185	0.049741	0.401164	0.0499696	0.420164	0.0501639	0.429641	0.0502319	0.426059	0.0500384	0.416627	0.0501857	0.41994	0.0500799	0.423507	0.050706	0.400403	0.0505146	0.409522	0.0507394	0.413164	0.0508365	0.439895	0.0512105	0.409403	0.0512688	0.44985	0.0515389	0.423074	0.0509634	0.40097	0.0514447
Plot name	Concordia19	0.366	0.049	0.206425	0.03	0.217708	0.0315113	0.271533	0.0357804	0.426358	0.0496016	0.438024	0.0494462	0.410911	0.0498277	0.399914	0.049756	0.410672	0.0500111	0.400627	0.0502605	0.419306	0.0504843	0.428772	0.0506096	0.425458	0.050358	0.415908	0.050504	0.41911	0.050434	0.422871	0.0509998	0.399279	0.0507942	0.408736	0.0511169	0.412307	0.0511119	0.438708	0.0515201	0.408277	0.0515825	0.449113	0.0518623	0.422323	0.0512645	0.399656	0.0517706
Plot Type	1	0.365	0.049	0.215283	0.0311875	0.24193	0.0347165	0.269713	0.0359798	0.423875	0.0498789	0.433201	0.049754	0.408537	0.0501455	0.397542	0.0499992	0.407192	0.0502589	0.399036	0.0505334	0.416774	0.0507792	0.42619	0.0509706	0.42367	0.0506652	0.413773	0.0508086	0.416659	0.0507692	0.420983	0.0512772	0.395959	0.0510609	0.406402	0.0514775	0.409776	0.0513694	0.435184	0.05181	0.404954	0.0518664	0.446926	0.0521622	0.42009	0.0515557	0.395779	0.0520584
1st free col	165	0.375	0.0492	0.224206	0.0323764	0.266635	0.0379317	0.26677	0.0361544	0.419814	0.0501322	0.425397	0.0500288	0.404696	0.0504219	0.393704	0.0502206	0.401562	0.0504735	0.396436	0.0507809	0.412678	0.0510357	0.421967	0.0513052	0.420746	0.0509514	0.41028	0.0510911	0.412692	0.0510707	0.417896	0.0515307	0.390585	0.0513031	0.402585	0.0518114	0.405682	0.0515976	0.429418	0.0520723	0.399579	0.0521081	0.44335	0.0524304	0.416435	0.051829	0.389508	0.0522956
Sigma Level	2	0.364	0.0495	0.233195	0.0335667	0.291832	0.0411569	0.262831	0.0362964	0.414285	0.0503546	0.414953	0.0502586	0.399558	0.0506449	0.388568	0.0504105	0.394029	0.0506456	0.392895	0.0509961	0.407198	0.0512426	0.416217	0.0516042	0.416765	0.051209	0.405526	0.0513438	0.407384	0.0513254	0.413693	0.0517533	0.383395	0.0515102	0.397387	0.0521096	0.400202	0.0517866	0.421567	0.0523	0.392387	0.0522969	0.438483	0.0526595	0.41146	0.0520769	0.381117	0.0524717
Absolute Errs	TRUE	0.358	0.0495	0.242249	0.0347583	0.317529	0.0443921	0.25807	0.0363997	0.407439	0.0505401	0.402326	0.0504335	0.393347	0.0508048	0.382358	0.0505607	0.38492	0.0507676	0.388513	0.0511733	0.400573	0.0513907	0.409097	0.0518594	0.411836	0.0514308	0.399638	0.0515599	0.400967	0.0515222	0.40849	0.051939	0.374701	0.0516731	0.390952	0.0523639	0.393578	0.0519281	0.411846	0.0524867	0.383692	0.0524247	0.432457	0.0528435	0.405299	0.0522928	0.370972	0.0525792
Symbol Type	1	0.362	0.0496	0.25137	0.0359513	0.343738	0.0476374	0.252693	0.0364597	0.399462	0.0506835	0.388068	0.0505457	0.386334	0.0508946	0.375346	0.0506644	0.374635	0.0508342	0.383406	0.0513075	0.393092	0.0514737	0.400801	0.0520639	0.406093	0.0516109	0.392778	0.0517335	0.393721	0.0516525	0.402427	0.0520828	0.364884	0.0517848	0.383454	0.0525673	0.386098	0.0520159	0.400519	0.0526274	0.373874	0.0524859	0.425437	0.0529771	0.398121	0.0524706	0.359518	0.0526133
Inverse Plot	FALSE	0.381	0.0499	0.260558	0.0371457	0.370468	0.0508927	0.246937	0.0364739	0.390573	0.0507811	0.372801	0.0505903	0.378825	0.0509102	0.367838	0.0507173	0.363623	0.0508425	0.377716	0.0513952	0.385083	0.051488	0.391557	0.052212	0.399693	0.0517444	0.385134	0.0518598	0.385962	0.0517105	0.395671	0.0521806	0.354373	0.0518403	0.375098	0.0527144	0.378089	0.0520463	0.387897	0.0527183	0.363362	0.0524778	0.417613	0.0530568	0.390121	0.0526056	0.347254	0.0525726
Color Plot	TRUE	0.366	0.05	0.269814	0.0383415	0.397729	0.0541582	0.241052	0.0364415	0.381013	0.05083	0.357194	0.0505655	0.371149	0.0508512	0.360162	0.050717	0.352365	0.0507921	0.371598	0.0514339	0.376896	0.0514328	0.381615	0.0522999	0.39281	0.0518275	0.376912	0.0519353	0.378031	0.0516938	0.388405	0.0522299	0.343627	0.0518373	0.366111	0.052801	0.369902	0.0520177	0.374323	0.0527569	0.352616	0.0524007	0.4092	0.0530804	0.381518	0.0526941	0.334717	0.0524587
3D plot	FALSE	0.382	0.0499	0.279137	0.0395386	0.425533	0.0574338	0.235296	0.0363641	0.371044	0.050829	0.341928	0.0504722	0.363642	0.0507199	0.352654	0.0506635	0.341354	0.0506852	0.365217	0.0514226	0.368888	0.0513107	0.371247	0.052325	0.385632	0.0518581	0.368339	0.051958	0.370272	0.0516031	0.380829	0.0522292	0.333115	0.0517758	0.356741	0.0528249	0.361893	0.0519316	0.360167	0.052742	0.342105	0.052258	0.400427	0.0530472	0.372546	0.0527337	0.322454	0.0522767
Linear	FALSE	0.364	0.05	0.288529	0.0407372	0.45389	0.0607196	0.22992	0.036245	0.360938	0.0507782	0.32767	0.0503146	0.356631	0.0505223	0.345642	0.0505591	0.33107	0.0505266	0.358749	0.0513616	0.361409	0.0511269	0.360736	0.0522867	0.378355	0.0518352	0.359647	0.0519274	0.363027	0.0514423	0.373148	0.0521787	0.323298	0.0516585	0.34724	0.0527853	0.354414	0.0517917	0.345815	0.0526742	0.332289	0.052056	0.391533	0.0529582	0.36345	0.0527232	0.311002	0.0520345
Data Range	V223:Z300	0.382	0.05	0.29799	0.0419371	0.482812	0.0640155	0.22516	0.0360893	0.350969	0.0506788	0.315043	0.0500995	0.350422	0.0502668	0.339432	0.0504085	0.321963	0.0503231	0.352369	0.0512525	0.354786	0.0508894	0.350369	0.052186	0.371178	0.0517595	0.351074	0.0518441	0.35661	0.0512184	0.365572	0.0520796	0.314605	0.0514906	0.33787	0.0526835	0.347791	0.051604	0.33166	0.0525553	0.323597	0.0518034	0.382761	0.0528158	0.354478	0.052663	0.300861	0.0517428
Filled Symbols	FALSE	0.377	0.0504	0.30752	0.0431384	IsoLine	IsoLine	0.221224	0.035904	0.34141	0.0505337	0.3046	0.0498364	0.345288	0.0499648	0.334296	0.0502181	0.314431	0.0500836	0.346252	0.0510983	0.349309	0.0506088	0.340428	0.0520257	0.364296	0.0516332	0.342854	0.0517106	0.351304	0.0509414	0.358307	0.0519347	0.307414	0.0512794	0.328885	0.052522	0.342313	0.0513768	0.318086	0.0523885	0.316408	0.0515114	0.37435	0.0526239	0.345875	0.0525547	0.292475	0.0514142
ConcAge	FALSE	0.349	0.0505	0.31712	0.044341			0.218282	0.0356971	0.332523	0.0503467	0.296797	0.0495367	0.341453	0.0496293	0.330458	0.0499964	0.308803	0.0498186	0.340565	0.0509033	0.345218	0.0502971	0.331184	0.0518102	0.357897	0.0514595	0.33521	0.0515304	0.347339	0.0506231	0.351553	0.051748	0.302041	0.0510342	0.32053	0.0523054	0.33822	0.0511201	0.305465	0.0521784	0.311037	0.0511926	0.36653	0.0523876	0.337875	0.0524013	0.286209	0.0510631
ConcSwap	FALSE	0.352	0.0505	0.326791	0.0455451			0.216465	0.0354777	0.324548	0.050123	0.291975	0.0492136	0.339083	0.049275	0.328086	0.049753	0.305325	0.0495397	0.335462	0.0506727	0.34269	0.0499681	0.322891	0.0515452	0.352155	0.0512433	0.328352	0.0513085	0.344888	0.0502777	0.345493	0.0515245	0.298721	0.0507656	0.313034	0.0520396	0.335691	0.050845	0.294141	0.0519306	0.307718	0.0508611	0.359513	0.0521136	0.330698	0.0522069	0.282338	0.0507049
1st Symbol-row	1	0.374	0.0507	0.336533	0.0467506			0.215851	0.0352553	0.317704	0.0498686	0.290344	0.0488811	0.338284	0.0489175	0.327284	0.0494985	0.30415	0.049259	0.331084	0.0504129	0.341836	0.0496361	0.315773	0.0512381	0.347227	0.0509905	0.322466	0.0510508	0.34406	0.0499201	0.340292	0.0512703	0.297597	0.0504854	0.306601	0.0517317	0.334836	0.0505635	0.284422	0.0516521	0.306597	0.0505312	0.353492	0.0518091	0.324537	0.0519769	0.28103	0.0503553
		0.353	0.0508	0.346346	0.0479574			0.216467	0.0350396	0.312177	0.0495906	0.291976	0.0485538	0.339089	0.0485723	0.328086	0.049244	0.305328	0.0489889	0.327548	0.0501308	0.342694	0.0493157	0.310025	0.0508973	0.343248	0.0507079	0.317713	0.0507645	0.34489	0.049566	0.336092	0.0509924	0.298721	0.0502058	0.301406	0.0513903	0.335693	0.0502881	0.276574	0.0513502	0.307723	0.0502175	0.34863	0.0514826	0.319563	0.0517175	0.282344	0.0500294
		0.358	0.0509	0.356231	0.0491656			0.218287	0.0348402	0.308119	0.0492964	0.296799	0.048246	0.341463	0.0482545	0.330458	0.0490008	0.308808	0.0487411	0.324953	0.0498344	0.345226	0.0490208	0.305804	0.0505319	0.340326	0.0504033	0.314223	0.0504574	0.347341	0.0492308	0.333009	0.0506983	0.302041	0.0499391	0.297592	0.0510246	0.338224	0.0500306	0.27081	0.0510334	0.311046	0.0499336	0.345061	0.0511429	0.315909	0.0514358	0.286221	0.0497416
		0.396	0.051	0.366189	0.0503753			0.22123	0.0346656	0.305639	0.0489942	0.304603	0.0479712	0.345304	0.0479781	0.334296	0.0487794	0.314438	0.0485265	0.323367	0.0495315	0.349322	0.0487643	0.303225	0.0501521	0.33854	0.050085	0.31209	0.0501377	0.351308	0.0489293	0.331125	0.0503961	0.307415	0.0496969	0.295261	0.0506446	0.342318	0.0498024	0.267289	0.0507102	0.316421	0.0496919	0.342881	0.0507993	0.313676	0.0511395	0.292492	0.0495044
		0.368	0.0509	0.37622	0.0515863			0.225169	0.0345236	0.304806	0.0486921	0.315047	0.0477414	0.350442	0.0477551	0.339432	0.0485895	0.321971	0.0483544	0.322836	0.0492304	0.354802	0.0485574	0.302359	0.0497681	0.337941	0.0497616	0.311373	0.0498143	0.356616	0.0486746	0.330493	0.050094	0.314605	0.0494898	0.294478	0.0502606	0.347798	0.0496134	0.266105	0.0503895	0.323613	0.0495031	0.34215	0.0504611	0.312926	0.0508366	0.300883	0.0493283
		0.341	0.0509	0.386325	0.0527987			0.22993	0.0344203	0.305642	0.0483984	0.327674	0.0475665	0.356653	0.0475952	0.345642	0.0484393	0.33108	0.0482324	0.323373	0.0489395	0.361427	0.0484093	0.303228	0.0493904	0.338542	0.049442	0.312092	0.049496	0.363033	0.0484778	0.331129	0.0498002	0.323299	0.0493269	0.295264	0.0498831	0.354422	0.0494719	0.267292	0.0500799	0.332308	0.0493753	0.342887	0.0501377	0.313677	0.0505355	0.311028	0.0492208
		0.405	0.051	0.396504	0.0540125			0.235307	0.0343603	0.308125	0.0481211	0.341932	0.0474543	0.363666	0.0475054	0.352654	0.0483356	0.341365	0.0481658	0.324964	0.0486666	0.368908	0.0483263	0.30581	0.0490294	0.34033	0.0491348	0.314227	0.0491914	0.370279	0.0483475	0.333017	0.0495228	0.333116	0.0492152	0.297598	0.0495225	0.361902	0.0493841	0.270816	0.04979	0.342126	0.0493141	0.345074	0.0498378	0.31591	0.0502443	0.322482	0.0491867
		0.392	0.051	0.406757	0.0552277			0.241063	0.0343461	0.312186	0.0478678	0.357199	0.0474097	0.371175	0.0474898	0.360162	0.0482827	0.352377	0.0481575	0.327564	0.0484191	0.376917	0.048312	0.310033	0.0486948	0.343254	0.0488486	0.31772	0.0489089	0.378038	0.0482895	0.336104	0.0492693	0.343627	0.0491597	0.301415	0.0491886	0.369911	0.0493537	0.276582	0.0495277	0.352638	0.0493222	0.34865	0.0495696	0.319565	0.049971	0.334746	0.0492274
		0.375	0.051	0.417086	0.0564443			0.246948	0.0343785	0.317715	0.0476454	0.372806	0.0474345	0.378851	0.0475488	0.367838	0.048283	0.363635	0.0482079	0.331105	0.0482039	0.385104	0.0483672	0.315783	0.0483958	0.347235	0.048591	0.322474	0.0486562	0.385969	0.0483062	0.340307	0.0490467	0.354373	0.0491627	0.306613	0.0488904	0.378098	0.0493823	0.284433	0.0493	0.363384	0.0493993	0.353517	0.0493405	0.32454	0.0497231	0.347283	0.0493413
		0.358	0.051	0.427491	0.0576624			0.252704	0.0344559	0.324561	0.0474599	0.388072	0.0475278	0.386358	0.0476801	0.375346	0.0483365	0.374646	0.0483148	0.335487	0.0480267	0.393112	0.0484893	0.322903	0.0481406	0.352164	0.0483692	0.328362	0.0484401	0.393728	0.0483969	0.34551	0.048861	0.364885	0.0492242	0.313048	0.0486361	0.386107	0.0494684	0.294154	0.0491133	0.373895	0.049542	0.359543	0.0491565	0.330701	0.0495072	0.359546	0.0495233
		0.369	0.0511	0.437972	0.0588818			0.25808	0.034575	0.332538	0.0473165	0.40233	0.0476854	0.393369	0.0478777	0.382358	0.0484409	0.38493	0.0484734	0.340594	0.0478925	0.400591	0.0486731	0.331199	0.0479361	0.357907	0.0481891	0.335222	0.0482665	0.400973	0.0485577	0.351573	0.0487172	0.374702	0.0493415	0.320546	0.0484327	0.393586	0.0496083	0.305481	0.0489726	0.383711	0.049744	0.366563	0.0490229	0.337879	0.0493294	0.370998	0.0497655
		0.341	0.051	0.44853	0.0601026			0.26284	0.0347307	0.341427	0.0472189	0.414957	0.0479005	0.399578	0.0481332	0.388568	0.0485915	0.394037	0.0486769	0.346284	0.0478048	0.407214	0.0489106	0.340443	0.047788	0.364307	0.0480556	0.342866	0.0481402	0.40739	0.0487816	0.358329	0.0486194	0.383395	0.0495094	0.328902	0.0482856	0.400209	0.049796	0.318103	0.0488817	0.392403	0.0499966	0.374387	0.0489432	0.345879	0.0491944	0.381139	0.0500572
		0.383	0.0511	0.459166	0.0613248			0.266776	0.034916	0.350987	0.04717	0.4254	0.0481636	0.404712	0.0484352	0.393704	0.0487819	0.401569	0.0489164	0.352402	0.0477661	0.412691	0.0491912	0.350385	0.0477001	0.37119	0.0479725	0.351088	0.0480647	0.412696	0.0490586	0.365595	0.0485701	0.390586	0.0497206	0.337889	0.048199	0.405687	0.0500232	0.331677	0.0488431	0.399592	0.0502886	0.3828	0.0489196	0.354482	0.0491059	0.389525	0.0503858
		0.383	0.0511	0.469879	0.0625485			0.269718	0.0351229	0.360956	0.047171	0.433203	0.0484633	0.408547	0.0487707	0.397542	0.0490036	0.407197	0.0491814	0.358783	0.0477774	0.416782	0.0495029	0.360753	0.047675	0.378368	0.0479419	0.359661	0.048042	0.416661	0.0493769	0.373171	0.0485708	0.395959	0.0499658	0.347259	0.0481751	0.40978	0.0502799	0.345833	0.048858	0.404963	0.0506074	0.391573	0.0489528	0.363454	0.0490663	0.395791	0.0507369
		0.385	0.0511	0.480672	0.0637735			0.271535	0.0353423	0.371062	0.0472218	0.438025	0.0487864	0.410917	0.049125	0.399914	0.049247	0.410675	0.0494603	0.365251	0.0478384	0.41931	0.0498319	0.371264	0.0477133	0.385645	0.0479648	0.368353	0.0480726	0.419112	0.0497223	0.380852	0.0486213	0.399279	0.0502344	0.35676	0.0482147	0.412309	0.050555	0.360185	0.0489258	0.408282	0.0509389	0.400467	0.0490418	0.37255	0.0490768	0.399662	0.0510951
		0.379	0.0511	0.491543	0.065			0.272149	0.0355647	0.381031	0.0473212	0.439656	0.0491189	0.411716	0.0494825	0.400716	0.0495015	0.41185	0.049741	0.371631	0.0479475	0.420164	0.0501639	0.381631	0.047814	0.392822	0.0480405	0.376926	0.0481559	0.41994	0.0500799	0.388428	0.0487204	0.400403	0.0505146	0.36613	0.0483165	0.413164	0.0508365	0.37434	0.0490447	0.409403	0.0512688	0.409239	0.0491842	0.381522	0.049137	0.40097	0.0514447
		0.396	0.0512	0.491543	0.065					0.39059	0.0474663									0.377748	0.0481017			0.391572	0.0479743	0.399704	0.0481668	0.385146	0.0482894			0.395693	0.0488653			0.375115	0.048478			0.387914	0.0492115			0.41765	0.0493761	0.390125	0.0492453
		0.376	0.0513	IsoLine	IsoLine					0.399477	0.0476533									0.383435	0.0482967			0.400816	0.0481898	0.406103	0.0483405	0.39279	0.0484696			0.402447	0.049052			0.38347	0.0486946			0.400535	0.0494216			0.42547	0.0496124	0.398125	0.0493987
		0.362	0.0513							0.407452	0.047877									0.388538	0.0485273			0.409109	0.0484548	0.411845	0.0485567	0.399648	0.0486915			0.408507	0.0492755			0.390966	0.0489604			0.411859	0.0496694			0.432487	0.0498864	0.405302	0.0495931
		0.401	0.0513							0.414296	0.0481314									0.392916	0.0487871			0.416227	0.0487619	0.416773	0.0488095	0.405534	0.0489492			0.413708	0.0495297			0.397399	0.0492683			0.421578	0.0499479			0.438508	0.0501909	0.411463	0.0498231
		0.336	0.0516							0.419823	0.0484094									0.396452	0.0490692			0.421975	0.0491027	0.420752	0.0490921	0.410287	0.0492355			0.417908	0.0498076			0.402594	0.0496097			0.429426	0.0502498			0.44337	0.0505174	0.416437	0.0500825
		0.362	0.0515							0.423881	0.0487036									0.399047	0.0493656			0.426196	0.0494681	0.423674	0.0493967	0.413777	0.0495426			0.420991	0.0501017			0.406408	0.0499754			0.43519	0.0505666			0.446939	0.0508571	0.420091	0.0503642
		0.407	0.0515							0.426361	0.0490058									0.400633	0.0496685			0.428775	0.0498479	0.42546	0.049715	0.41591	0.0498623			0.422875	0.0504039			0.408739	0.0503554			0.438711	0.0508898			0.449119	0.0512007	0.422324	0.0506605
		0.404	0.0516							0.427194	0.0493079									0.401164	0.0499696			0.429641	0.0502319	0.426059	0.0500384	0.416627	0.0501857			0.423507	0.050706			0.409522	0.0507394			0.439895	0.0512105			0.44985	0.0515389	0.423074	0.0509634
		0.355	0.0516
		0.365	0.0516
		0.371	0.0516
		0.403	0.0517
		0.366	0.0519
		0.36	0.0519
		0.377	0.052
		0.368	0.052
		0.364	0.0521
		0.398	0.0521
		0.342	0.0523
		0.366	0.0522
		0.431	0.0524
		0.388	0.0523
		0.364	0.0523
		0.418	0.0524
		0.402	0.0525
		0.388	0.0526
		0.362	0.0527
		0.421	0.0526
		0.432	0.0528
		0.405	0.0528
		0.423	0.0528
		0.382	0.0529
		0.392	0.05297
		0.433	0.0531
		0.399	0.0531
		0.398	0.0531
		0.366	0.0532
		0.361	0.0532
		0.393	0.0534
		0.389	0.0535
		0.403	0.0535
		0.414	0.0536
		0.364	0.0539
		0.397	0.054
		0.356	0.0544
		0.442	0.0547
		0.391	0.0549
		IsoLine	IsoLine
[truncated: 114 more columns]

## Sheet: PlotDat20
Source sheet	TO-19-16 UPb_All_Integrations	210	0	222	0	210	0
Plot name	ProbDens20	210.08	0	226	0	369.92	0
Plot Type	16	210.16	0	226	1
1st free col	9	210.24	0	222	1
Sigma Level	2	210.32	0	222	0
Absolute Errs	TRUE	210.4	0	ErrBox	ErrBox
Symbol Type	1	210.48	0	306	0
Inverse Plot	FALSE	210.56	0	310	0
Color Plot	TRUE	210.64	0	310	3
3D plot	FALSE	210.72	0	306	3
Linear	FALSE	210.8	0	306	0
Data Range	AB223:AC300	210.88	0	ErrBox	ErrBox
Filled Symbols	TRUE	210.96	0	310	0
ConcAge	FALSE	211.04	0	314	0
ConcSwap	FALSE	211.12	0	314	4
1st Symbol-row	1	211.2	1.46455e-08	310	4
		211.28	1.69024e-08	310	0
		211.36	1.94899e-08	ErrBox	ErrBox
		211.44	2.24538e-08	314	0
		211.52	2.58458e-08	318	0
		211.6	2.9724e-08	318	6
		211.68	3.41542e-08	314	6
		211.76	3.92102e-08	314	0
		211.84	4.49752e-08	ErrBox	ErrBox
		211.92	5.15425e-08	318	0
		212	5.9017e-08	322	0
		212.08	6.75161e-08	322	17
		212.16	7.71714e-08	318	17
		212.24	8.81301e-08	318	0
		212.32	1.00557e-07	ErrBox	ErrBox
		212.4	1.14635e-07	322	0
		212.48	1.30569e-07	326	0
		212.56	1.48587e-07	326	12
		212.64	1.68944e-07	322	12
		212.72	1.91921e-07	322	0
		212.8	2.17832e-07	ErrBox	ErrBox
		212.88	2.47024e-07	326	0
		212.96	2.79882e-07	330	0
		213.04	3.16833e-07	330	12
		213.12	3.58347e-07	326	12
		213.2	4.04945e-07	326	0
		213.28	4.57201e-07	ErrBox	ErrBox
		213.36	5.15748e-07	330	0
		213.44	5.81281e-07	334	0
		213.52	6.54565e-07	334	12
		213.6	7.36443e-07	330	12
		213.68	8.27835e-07	330	0
		213.76	9.29752e-07	ErrBox	ErrBox
		213.84	1.0433e-06	334	0
		213.92	1.16969e-06	338	0
		214	1.31024e-06	338	6
		214.08	1.46639e-06	334	6
		214.16	1.6397e-06	334	0
		214.24	1.8319e-06	ErrBox	ErrBox
		214.32	2.04482e-06	338	0
		214.4	2.28049e-06	342	0
		214.48	2.54109e-06	342	3
		214.56	2.82899e-06	338	3
		214.64	3.14674e-06	338	0
		214.72	3.49711e-06	ErrBox	ErrBox
		214.8	3.88308e-06	342	0
		214.88	4.30786e-06	346	0
		214.96	4.77492e-06	346	2
		215.04	5.28797e-06	342	2
		215.12	5.85101e-06	342	0
		215.2	6.46832e-06	ErrBox	ErrBox
		215.28	7.14448e-06
		215.36	7.8844e-06
		215.44	8.69331e-06
		215.52	9.5768e-06
		215.6	1.05408e-05
		215.68	1.15917e-05
		215.76	1.27362e-05
		215.84	1.39814e-05
		215.92	1.53348e-05
		216	1.68045e-05
		216.08	1.83989e-05
		216.16	2.0127e-05
		216.24	2.19979e-05
		216.32	2.40217e-05
		216.4	2.62087e-05
		216.48	2.85697e-05
		216.56	3.11161e-05
		216.64	3.38597e-05
		216.72	3.68128e-05
		216.8	3.99884e-05
		216.88	4.33998e-05
		216.96	4.70609e-05
		217.04	5.09861e-05
		217.12	5.51901e-05
		217.2	5.96884e-05
		217.28	6.44967e-05
		217.36	6.96312e-05
		217.44	7.51084e-05
		217.52	8.09454e-05
		217.6	8.71594e-05
		217.68	9.37681e-05
		217.76	0.000100789
		217.84	0.000108241
		217.92	0.000116142
		218	0.000124511
		218.08	0.000133365
		218.16	0.000142723
		218.24	0.000152604
		218.32	0.000163026
		218.4	0.000174007
		218.48	0.000185565
		218.56	0.000197716
		218.64	0.000210479
		218.72	0.000223868
		218.8	0.000237901
		218.88	0.000252591
		218.96	0.000267953
		219.04	0.000284
		219.12	0.000300743
		219.2	0.000318195
		219.28	0.000336363
		219.36	0.000355257
		219.44	0.000374883
		219.52	0.000395246
		219.6	0.000416349
		219.68	0.000438195
		219.76	0.000460782
		219.84	0.000484107
		219.92	0.000508168
		220	0.000532956
		220.08	0.000558462
		220.16	0.000584676
		220.24	0.000611584
		220.32	0.000639168
		220.4	0.00066741
		220.48	0.000696288
		220.56	0.000725779
		220.64	0.000755854
		220.72	0.000786485
		220.8	0.00081764
		220.88	0.000849282
		220.96	0.000881375
		221.04	0.000913879
		221.12	0.000946749
		221.2	0.000979941
		221.28	0.00101341
		221.36	0.00104709
		221.44	0.00108095
		221.52	0.00111493
		221.6	0.00114896
		221.68	0.001183
		221.76	0.00121697
		221.84	0.00125082
		221.92	0.00128448
		222	0.00131789
		222.08	0.00135099
		222.16	0.00138369
		222.24	0.00141595
		222.32	0.00144769
		222.4	0.00147884
		222.48	0.00150934
		222.56	0.00153911
		222.64	0.00156809
		222.72	0.00159622
		222.8	0.00162342
		222.88	0.00164964
		222.96	0.00167482
		223.04	0.00169888
		223.12	0.00172178
		223.2	0.00174345
		223.28	0.00176385
		223.36	0.00178292
		223.44	0.00180062
		223.52	0.0018169
		223.6	0.00183171
		223.68	0.00184503
		223.76	0.00185681
		223.84	0.00186702
		223.92	0.00187565
		224	0.00188266
		224.08	0.00188804
		224.16	0.00189177
		224.24	0.00189385
		224.32	0.00189427
		224.4	0.00189302
		224.48	0.00189011
		224.56	0.00188555
		224.64	0.00187936
		224.72	0.00187154
		224.8	0.00186211
		224.88	0.00185111
		224.96	0.00183856
		225.04	0.00182449
		225.12	0.00180894
		225.2	0.00179195
		225.28	0.00177356
		225.36	0.00175382
		225.44	0.00173277
		225.52	0.00171048
		225.6	0.00168699
		225.68	0.00166237
		225.76	0.00163666
		225.84	0.00160994
		225.92	0.00158227
		226	0.0015537
		226.08	0.00152432
		226.16	0.00149418
		226.24	0.00146334
		226.32	0.00143189
		226.4	0.00139988
		226.48	0.00136739
		226.56	0.00133448
		226.64	0.00130122
		226.72	0.00126768
		226.8	0.00123391
		226.88	0.00119999
		226.96	0.00116598
		227.04	0.00113194
		227.12	0.00109793
		227.2	0.00106401
		227.28	0.00103023
		227.36	0.000996642
		227.44	0.000963307
		227.52	0.000930271
		227.6	0.000897578
		227.68	0.000865275
		227.76	0.000833402
		227.84	0.000801999
		227.92	0.000771102
		228	0.000740745
		228.08	0.000710958
		228.16	0.000681771
		228.24	0.000653208
		228.32	0.000625292
		228.4	0.000598044
		228.48	0.000571482
		228.56	0.00054562
		228.64	0.000520471
		228.72	0.000496046
		228.8	0.000472352
		228.88	0.000449396
		228.96	0.000427179
		229.04	0.000405705
		229.12	0.000384972
		229.2	0.000364978
		229.28	0.000345719
		229.36	0.000327189
		229.44	0.00030938
		229.52	0.000292284
		229.6	0.00027589
		229.68	0.000260187
		229.76	0.000245163
		229.84	0.000230803
		229.92	0.000217094
		230	0.00020402
		230.08	0.000191565
		230.16	0.000179713
		230.24	0.000168446
		230.32	0.000157747
		230.4	0.000147597
		230.48	0.00013798
		230.56	0.000128876
		230.64	0.000120267
		230.72	0.000112135
		230.8	0.00010446
		230.88	9.72261e-05
		230.96	9.04133e-05
		231.04	8.40042e-05
		231.12	7.79808e-05
		231.2	7.23259e-05
		231.28	6.70221e-05
		231.36	6.20528e-05
		231.44	5.74015e-05
		231.52	5.30523e-05
		231.6	4.89896e-05
		231.68	4.51983e-05
		231.76	4.16638e-05
		231.84	3.8372e-05
		231.92	3.53092e-05
		232	3.24625e-05
		232.08	2.9819e-05
		232.16	2.73668e-05
		232.24	2.50942e-05
		232.32	2.29901e-05
		232.4	2.1044e-05
		232.48	1.92457e-05
		232.56	1.75856e-05
		232.64	1.60546e-05
		232.72	1.46441e-05
		232.8	1.33457e-05
		232.88	1.21518e-05
		232.96	1.1055e-05
		233.04	1.00484e-05
		233.12	9.12537e-06
		233.2	8.27989e-06
		233.28	7.50615e-06
		233.36	6.79874e-06
		233.44	6.1526e-06
		233.52	5.56298e-06
		233.6	5.02545e-06
		233.68	4.53588e-06
		233.76	4.09041e-06
		233.84	3.68545e-06
		233.92	3.31767e-06
		234	2.98397e-06
		234.08	2.68148e-06
		234.16	2.40753e-06
		234.24	2.15968e-06
		234.32	1.93565e-06
		234.4	1.73333e-06
		234.48	1.55079e-06
		234.56	1.38627e-06
		234.64	1.23811e-06
		234.72	1.10481e-06
		234.8	9.84999e-07
		234.88	8.77411e-07
		234.96	7.80888e-07
		235.04	6.94374e-07
		235.12	6.16903e-07
		235.2	5.47595e-07
		235.28	4.85646e-07
		235.36	4.30328e-07
		235.44	3.80976e-07
		235.52	3.36988e-07
		235.6	2.97818e-07
		235.68	2.62969e-07
		235.76	2.31995e-07
		235.84	2.04489e-07
		235.92	1.80086e-07
		236	1.58457e-07
		236.08	1.39302e-07
		236.16	1.22356e-07
		236.24	1.07377e-07
		236.32	9.41488e-08
		236.4	8.2478e-08
		236.48	7.21904e-08
		236.56	6.31306e-08
		236.64	5.51594e-08
		236.72	4.81523e-08
		236.8	4.19985e-08
		236.88	3.6599e-08
		236.96	3.18657e-08
		237.04	2.77202e-08
		237.12	2.40928e-08
		237.2	2.09217e-08
		237.28	1.81521e-08
		237.36	1.57353e-08
		237.44	1.36283e-08
		237.52	0
		237.6	0
		237.68	0
		237.76	0
		237.84	0
		237.92	0
		238	0
		238.08	0
		238.16	0
		238.24	0
		238.32	0
		238.4	0
		238.48	0
		238.56	0
		238.64	0
		238.72	0
		238.8	0
		238.88	0
		238.96	0
		239.04	0
		239.12	0
		239.2	0
		239.28	0
		239.36	0
		239.44	0
		239.52	0
		239.6	0
		239.68	0
		239.76	0
		239.84	0
		239.92	0
		240	0
		240.08	0
		240.16	0
		240.24	0
		240.32	0
		240.4	0
		240.48	0
		240.56	0
		240.64	0
		240.72	0
		240.8	0
		240.88	0
		240.96	0
		241.04	0
		241.12	0
		241.2	0
		241.28	0
		241.36	0
		241.44	0
		241.52	0
		241.6	0
		241.68	0
		241.76	0
		241.84	0
		241.92	0
		242	0
		242.08	0
		242.16	0
		242.24	0
		242.32	0
		242.4	0
		242.48	0
		242.56	0
		242.64	0
		242.72	0
		242.8	0
		242.88	0
		242.96	0
		243.04	0
		243.12	0
		243.2	0
		243.28	0
		243.36	0
		243.44	0
		243.52	0
		243.6	0
		243.68	0
		243.76	0
		243.84	0
		243.92	0
		244	0
		244.08	0
		244.16	0
		244.24	0
		244.32	0
		244.4	0
		244.48	0
		244.56	0
		244.64	0
		244.72	0
		244.8	0
		244.88	0
		244.96	0
		245.04	0
		245.12	0
		245.2	0
		245.28	0
		245.36	0
		245.44	0
		245.52	0
		245.6	0
		245.68	0
		245.76	0
		245.84	0
		245.92	0
		246	0
		246.08	0
		246.16	0
		246.24	0
		246.32	0
		246.4	0
		246.48	0
		246.56	0
		246.64	0
		246.72	0
		246.8	0
		246.88	0
		246.96	0
		247.04	0
		247.12	0
		247.2	0
		247.28	0
		247.36	0
		247.44	0
		247.52	0
		247.6	0
		247.68	0
		247.76	0
		247.84	0
		247.92	0
		248	0
		248.08	0
		248.16	0
		248.24	0
		248.32	0
		248.4	0
		248.48	0
		248.56	0
		248.64	0
		248.72	0
		248.8	0
		248.88	0
		248.96	0
		249.04	0
		249.12	0
		249.2	0
		249.28	0
		249.36	0
		249.44	0
		249.52	0
		249.6	0
		249.68	0
		249.76	0
		249.84	0
		249.92	0
		250	0
		250.08	0
		250.16	0
		250.24	0
		250.32	0
		250.4	0
		250.48	0
		250.56	0
		250.64	0
		250.72	0
		250.8	0
		250.88	0
		250.96	0
		251.04	0
		251.12	0
		251.2	0
		251.28	0
		251.36	0
		251.44	0
		251.52	0
		251.6	0
		251.68	0
		251.76	0
		251.84	0
		251.92	0
		252	0
		252.08	0
		252.16	0
		252.24	0
		252.32	0
		252.4	0
		252.48	0
		252.56	0
		252.64	0
		252.72	0
		252.8	0
		252.88	0
		252.96	0
		253.04	0
		253.12	0
		253.2	0
		253.28	0
		253.36	0
		253.44	0
		253.52	0
		253.6	0
		253.68	0
		253.76	0
		253.84	0
		253.92	0
		254	0
		254.08	0
		254.16	0
		254.24	0
		254.32	0
		254.4	0
		254.48	0
		254.56	0
		254.64	0
		254.72	0
		254.8	0
		254.88	0
		254.96	0
		255.04	0
		255.12	0
		255.2	0
		255.28	0
		255.36	0
		255.44	0
		255.52	0
		255.6	0
		255.68	0
		255.76	0
		255.84	0
		255.92	0
		256	0
		256.08	0
		256.16	0
		256.24	0
		256.32	0
		256.4	0
		256.48	0
		256.56	0
		256.64	0
		256.72	0
		256.8	0
		256.88	0
		256.96	0
		257.04	0
		257.12	0
		257.2	0
		257.28	0
		257.36	0
		257.44	0
		257.52	0
		257.6	0
		257.68	0
		257.76	0
		257.84	0
		257.92	0
		258	0
		258.08	0
		258.16	0
		258.24	0
		258.32	0
		258.4	0
		258.48	0
		258.56	0
		258.64	0
		258.72	0
		258.8	0
		258.88	0
		258.96	0
		259.04	0
		259.12	0
		259.2	0
		259.28	0
		259.36	0
		259.44	0
		259.52	0
		259.6	0
		259.68	0
		259.76	0
		259.84	0
		259.92	0
		260	0
		260.08	0
		260.16	0
		260.24	0
		260.32	0
		260.4	0
		260.48	0
		260.56	0
		260.64	0
		260.72	0
		260.8	0
		260.88	0
		260.96	0
		261.04	0
		261.12	0
		261.2	0
		261.28	0
		261.36	0
		261.44	0
		261.52	0
		261.6	0
		261.68	0
		261.76	0
		261.84	0
		261.92	0
		262	0
		262.08	0
		262.16	0
		262.24	0
		262.32	0
		262.4	0
		262.48	0
		262.56	0
		262.64	0
		262.72	0
		262.8	0
		262.88	0
		262.96	0
		263.04	0
		263.12	0
		263.2	0
		263.28	0
		263.36	0
		263.44	0
		263.52	0
		263.6	0
		263.68	0
		263.76	0
		263.84	0
		263.92	0
		264	0
		264.08	0
		264.16	0
		264.24	0
		264.32	0
		264.4	0
		264.48	0
		264.56	0
		264.64	0
		264.72	0
		264.8	0
		264.88	0
		264.96	0
		265.04	0
		265.12	0
		265.2	0
		265.28	0
		265.36	0
		265.44	0
		265.52	0
		265.6	0
		265.68	0
		265.76	0
		265.84	0
		265.92	0
		266	0
		266.08	0
		266.16	0
		266.24	0
		266.32	0
		266.4	0
		266.48	0
		266.56	0
		266.64	0
		266.72	0
		266.8	0
		266.88	0
		266.96	0
		267.04	0
		267.12	0
		267.2	0
		267.28	0
		267.36	0
		267.44	0
		267.52	0
		267.6	0
		267.68	0
		267.76	0
		267.84	0
		267.92	0
		268	0
		268.08	0
		268.16	0
		268.24	0
		268.32	0
		268.4	0
		268.48	0
		268.56	0
		268.64	0
		268.72	0
		268.8	0
		268.88	0
		268.96	0
		269.04	0
		269.12	0
		269.2	0
		269.28	0
		269.36	0
		269.44	0
		269.52	0
		269.6	0
		269.68	0
		269.76	0
		269.84	0
		269.92	0
		270	0
		270.08	0
		270.16	0
		270.24	0
		270.32	0
		270.4	0
		270.48	0
		270.56	0
		270.64	0
		270.72	0
		270.8	0
		270.88	0
		270.96	0
		271.04	0
		271.12	0
		271.2	0
		271.28	0
		271.36	0
		271.44	0
		271.52	0
		271.6	0
		271.68	0
		271.76	0
		271.84	0
		271.92	0
		272	0
		272.08	0
		272.16	0
		272.24	0
		272.32	0
		272.4	0
		272.48	0
		272.56	0
		272.64	0
		272.72	0
		272.8	0
		272.88	0
		272.96	0
		273.04	0
		273.12	0
		273.2	0
		273.28	0
		273.36	0
		273.44	0
		273.52	0
		273.6	0
		273.68	0
		273.76	0
		273.84	0
		273.92	0
		274	0
		274.08	0
		274.16	0
		274.24	0
		274.32	0
		274.4	0
		274.48	0
		274.56	0
		274.64	0
		274.72	0
		274.8	0
		274.88	0
		274.96	0
		275.04	0
		275.12	0
		275.2	0
		275.28	0
		275.36	0
		275.44	0
		275.52	0
		275.6	0
		275.68	0
		275.76	0
		275.84	0
		275.92	0
		276	0
		276.08	0
		276.16	0
		276.24	0
		276.32	0
		276.4	0
		276.48	0
		276.56	0
		276.64	0
		276.72	0
		276.8	0
		276.88	0
		276.96	0
		277.04	0
		277.12	0
		277.2	0
		277.28	0
		277.36	0
		277.44	0
		277.52	0
		277.6	0
		277.68	0
		277.76	0
		277.84	0
		277.92	0
		278	0
		278.08	0
		278.16	0
		278.24	0
		278.32	0
		278.4	0
		278.48	0
		278.56	0
		278.64	0
		278.72	0
		278.8	0
		278.88	0
		278.96	0
		279.04	0
		279.12	0
		279.2	0
		279.28	0
		279.36	0
		279.44	0
		279.52	0
		279.6	0
		279.68	0
		279.76	0
		279.84	0
		279.92	0
		280	0
		280.08	0
		280.16	0
		280.24	0
		280.32	0
		280.4	0
		280.48	0
		280.56	0
		280.64	0
		280.72	0
		280.8	0
		280.88	0
		280.96	0
		281.04	0
		281.12	0
		281.2	0
		281.28	0
		281.36	0
		281.44	0
		281.52	0
		281.6	0
		281.68	0
		281.76	0
		281.84	0
		281.92	0
		282	0
		282.08	0
		282.16	0
		282.24	0
		282.32	0
		282.4	0
		282.48	0
		282.56	0
		282.64	0
		282.72	0
		282.8	0
		282.88	0
		282.96	0
		283.04	0
		283.12	0
		283.2	0
		283.28	0
		283.36	0
		283.44	0
		283.52	0
		283.6	0
		283.68	0
		283.76	0
		283.84	0
		283.92	0
		284	0
		284.08	0
		284.16	0
		284.24	0
		284.32	0
		284.4	0
		284.48	0
		284.56	0
		284.64	0
		284.72	0
		284.8	0
		284.88	0
		284.96	0
		285.04	0
		285.12	0
		285.2	0
		285.28	0
		285.36	0
		285.44	0
		285.52	0
		285.6	0
		285.68	0
		285.76	2.67035e-08
		285.84	2.86932e-08
		285.92	3.08263e-08
		286	3.31129e-08
		286.08	3.55636e-08
		286.16	3.81895e-08
		286.24	4.10029e-08
		286.32	4.40163e-08
		286.4	4.72436e-08
		286.48	5.06991e-08
		286.56	5.43983e-08
		286.64	5.83577e-08
		286.72	6.25946e-08
		286.8	6.71277e-08
		286.88	7.19768e-08
		286.96	7.71627e-08
		287.04	8.27077e-08
		287.12	8.86356e-08
		287.2	9.49714e-08
		287.28	1.01742e-07
		287.36	1.08975e-07
		287.44	1.16701e-07
		287.52	1.24952e-07
		287.6	1.33762e-07
		287.68	1.43166e-07
		287.76	1.53202e-07
		287.84	1.63911e-07
		287.92	1.75335e-07
		288	1.87518e-07
		288.08	2.0051e-07
		288.16	2.14359e-07
		288.24	2.2912e-07
		288.32	2.44849e-07
		288.4	2.61606e-07
		288.48	2.79453e-07
		288.56	2.98458e-07
		288.64	3.1869e-07
		288.72	3.40224e-07
		288.8	3.76286e-07
		288.88	4.01966e-07
		288.96	4.29318e-07
		289.04	4.58447e-07
		289.12	4.8946e-07
		289.2	5.22473e-07
		289.28	5.57608e-07
		289.36	6.08856e-07
		289.44	6.49942e-07
		289.52	6.93676e-07
		289.6	7.40219e-07
		289.68	7.89742e-07
		289.76	8.55615e-07
		289.84	9.12501e-07
		289.92	9.7299e-07
		290	1.0373e-06
		290.08	1.10565e-06
		290.16	1.17829e-06
		290.24	1.25547e-06
		290.32	1.35124e-06
		290.4	1.43939e-06
		290.48	1.53301e-06
		290.56	1.63241e-06
		290.64	1.75141e-06
		290.72	1.86457e-06
		290.8	1.98468e-06
		290.88	2.11212e-06
		290.96	2.24732e-06
		291.04	2.40408e-06
		291.12	2.55723e-06
		291.2	2.71962e-06
		291.28	2.89177e-06
		291.36	3.07423e-06
		291.44	3.26758e-06
		291.52	3.47243e-06
		291.6	3.68941e-06
		291.68	3.91919e-06
		291.76	4.16247e-06
		291.84	4.42e-06
		291.92	4.69255e-06
		292	4.98093e-06
		292.08	5.286e-06
		292.16	5.60865e-06
		292.24	5.94982e-06
		292.32	6.31049e-06
		292.4	6.69171e-06
		292.48	7.09453e-06
		292.56	7.52011e-06
		292.64	7.96962e-06
		292.72	8.4443e-06
		292.8	8.94545e-06
		292.88	9.47442e-06
		292.96	1.00326e-05
		293.04	1.06216e-05
		293.12	1.12428e-05
		293.2	1.18979e-05
		293.28	1.25886e-05
		293.36	1.33167e-05
		293.44	1.40839e-05
		293.52	1.48923e-05
		293.6	1.57438e-05
		293.68	1.66405e-05
		293.76	1.75845e-05
		293.84	1.85782e-05
		293.92	1.9624e-05
		294	2.07242e-05
		294.08	2.18814e-05
		294.16	2.30983e-05
		294.24	2.43777e-05
		294.32	2.57224e-05
		294.4	2.71485e-05
		294.48	2.8634e-05
		294.56	3.02077e-05
		294.64	3.18473e-05
		294.72	3.35687e-05
		294.8	3.53753e-05
		294.88	3.7271e-05
		294.96	3.92597e-05
		295.04	4.13453e-05
		295.12	4.35321e-05
		295.2	4.58243e-05
		295.28	4.82265e-05
		295.36	5.07432e-05
		295.44	5.33927e-05
		295.52	5.61544e-05
		295.6	5.90456e-05
		295.68	6.20716e-05
		295.76	6.52643e-05
		295.84	6.85789e-05
		295.92	7.20585e-05
		296	7.56982e-05
		296.08	7.94896e-05
		296.16	8.34519e-05
		296.24	8.75914e-05
		296.32	9.19289e-05
		296.4	9.64449e-05
		296.48	0.000101172
		296.56	0.000106093
		296.64	0.000111227
		296.72	0.000116583
		296.8	0.000122167
		296.88	0.00012799
		296.96	0.000134058
		297.04	0.000140381
		297.12	0.000146967
		297.2	0.000153826
		297.28	0.000160979
		297.36	0.000168412
		297.44	0.000176147
		297.52	0.000184192
		297.6	0.000192558
		297.68	0.000201257
		297.76	0.000210338
		297.84	0.000219736
		297.92	0.000229497
		298	0.000239648
		298.08	0.000250174
		298.16	0.000261099
		298.24	0.000272449
		298.32	0.000284209
		298.4	0.000296406
		298.48	0.000309051
		298.56	0.000322157
		298.64	0.000335737
		298.72	0.000349804
		298.8	0.000364372
		298.88	0.000379455
		298.96	0.000395066
		299.04	0.000411219
		299.12	0.000427928
		299.2	0.000445221
		299.28	0.000463088
		299.36	0.000481554
		299.44	0.000500635
		299.52	0.000520345
		299.6	0.000540701
		299.68	0.000561717
		299.76	0.000583409
		299.84	0.000605791
		299.92	0.000628895
		300	0.000652709
		300.08	0.000677262
		300.16	0.00070257
		300.24	0.000728649
		300.32	0.000755516
		300.4	0.000783187
		300.48	0.000811678
		300.56	0.000841006
		300.64	0.000871201
		300.72	0.000902255
		300.8	0.000934209
		300.88	0.000967069
		300.96	0.00100084
		301.04	0.00103554
		301.12	0.00107121
		301.2	0.00110784
		301.28	0.00114548
		301.36	0.00118411
		301.44	0.00122378
		301.52	0.00126448
		301.6	0.00130626
		301.68	0.0013491
		301.76	0.00139304
		301.84	0.00143808
		301.92	0.00148426
		302	0.00153159
		302.08	0.00158007
		302.16	0.00162972
		302.24	0.00168058
		302.32	0.00173264
		302.4	0.00178593
		302.48	0.00184047
		302.56	0.00189627
		302.64	0.00195335
		302.72	0.00201174
		302.8	0.00207144
		302.88	0.00213246
		302.96	0.00219483
		303.04	0.00225857
		303.12	0.00232368
		303.2	0.00239017
		303.28	0.00245807
		303.36	0.00252741
		303.44	0.00259818
		303.52	0.00267041
		303.6	0.00274409
		303.68	0.00281924
		303.76	0.00289589
		303.84	0.00297404
		303.92	0.0030537
		304	0.00313491
		304.08	0.00321766
		304.16	0.00330194
		304.24	0.00338779
		304.32	0.00347523
		304.4	0.00356423
		304.48	0.00365482
		304.56	0.003747
		304.64	0.00384079
		304.72	0.0039362
		304.8	0.00403322
		304.88	0.00413185
		304.96	0.00423211
		305.04	0.00433399
		305.12	0.00443749
		305.2	0.00454263
		305.28	0.00464941
		305.36	0.0047578
		305.44	0.00486782
		305.52	0.00497946
		305.6	0.0050927
		305.68	0.00520754
		305.76	0.00532398
		305.84	0.00544201
		305.92	0.00556161
		306	0.00568279
		306.08	0.00580552
		306.16	0.00592977
		306.24	0.00605553
		306.32	0.00618279
		306.4	0.00631153
		306.48	0.00644172
		306.56	0.00657334
		306.64	0.00670637
		306.72	0.00684078
		306.8	0.00697654
		306.88	0.00711362
		306.96	0.00725199
		307.04	0.00739162
		307.12	0.00753247
		307.2	0.00767449
		307.28	0.00781768
		307.36	0.00796197
		307.44	0.00810732
		307.52	0.00825369
		307.6	0.00840104
		307.68	0.00854934
		307.76	0.00869852
		307.84	0.00884855
		307.92	0.00899937
		308	0.00915095
		308.08	0.00930322
		308.16	0.00945615
		308.24	0.00960968
		308.32	0.00976377
		308.4	0.00991835
		308.48	0.0100734
		308.56	0.0102288
		308.64	0.0103846
		308.72	0.0105407
		308.8	0.010697
		308.88	0.0108535
		308.96	0.0110102
		309.04	0.011167
		309.12	0.0113238
		309.2	0.0114807
		309.28	0.0116375
		309.36	0.0117943
		309.44	0.011951
		309.52	0.0121075
		309.6	0.0122638
		309.68	0.01242
		309.76	0.0125759
		309.84	0.0127315
		309.92	0.0128868
		310	0.0130418
		310.08	0.0131965
		310.16	0.0133508
		310.24	0.0135047
		310.32	0.0136583
		310.4	0.0138115
		310.48	0.0139644
		310.56	0.0141168
		310.64	0.0142689
		310.72	0.0144206
		310.8	0.0145719
		310.88	0.0147229
		310.96	0.0148736
		311.04	0.015024
		311.12	0.0151742
		311.2	0.0153241
		311.28	0.0154738
		311.36	0.0156234
		311.44	0.0157728
		311.52	0.0159222
		311.6	0.0160716
		311.68	0.016221
		311.76	0.0163705
		311.84	0.0165202
		311.92	0.0166702
		312	0.0168204
		312.08	0.0169709
		312.16	0.0171219
		312.24	0.0172734
		312.32	0.0174255
		312.4	0.0175783
		312.48	0.0177318
		312.56	0.0178861
		312.64	0.0180413
		312.72	0.0181975
		312.8	0.0183548
		312.88	0.0185132
		312.96	0.0186729
		313.04	0.0188339
		313.12	0.0189964
		313.2	0.0191603
		313.28	0.0193258
		313.36	0.019493
		313.44	0.019662
		313.52	0.0198327
		313.6	0.0200054
		313.68	0.02018
		313.76	0.0203567
		313.84	0.0205355
		313.92	0.0207165
		314	0.0208997
		314.08	0.0210853
		314.16	0.0212732
		314.24	0.0214635
		314.32	0.0216563
		314.4	0.0218516
		314.48	0.0220494
		314.56	0.0222498
		314.64	0.0224528
		314.72	0.0226585
		314.8	0.0228668
		314.88	0.0230778
		314.96	0.0232914
		315.04	0.0235077
		315.12	0.0237266
		315.2	0.0239483
		315.28	0.0241725
		315.36	0.0243994
		315.44	0.0246289
		315.52	0.0248609
		315.6	0.0250954
		315.68	0.0253324
		315.76	0.0255719
		315.84	0.0258137
		315.92	0.0260577
		316	0.0263041
		316.08	0.0265525
		316.16	0.0268031
		316.24	0.0270556
		316.32	0.02731
		316.4	0.0275662
		316.48	0.0278241
		316.56	0.0280836
		316.64	0.0283446
		316.72	0.0286069
		316.8	0.0288705
		316.88	0.0291352
		316.96	0.0294009
		317.04	0.0296674
		317.12	0.0299346
		317.2	0.0302024
		317.28	0.0304706
		317.36	0.0307392
		317.44	0.0310078
		317.52	0.0312765
		317.6	0.0315449
		317.68	0.0318131
		317.76	0.0320808
		317.84	0.0323478
		317.92	0.032614
		318	0.0328793
		318.08	0.0331434
		318.16	0.0334063
		318.24	0.0336677
		318.32	0.0339275
		318.4	0.0341856
		318.48	0.0344417
		318.56	0.0346958
		318.64	0.0349476
		318.72	0.035197
		318.8	0.0354439
		318.88	0.035688
		318.96	0.0359293
		319.04	0.0361676
		319.12	0.0364028
		319.2	0.0366347
		319.28	0.0368631
		319.36	0.037088
		319.44	0.0373092
		319.52	0.0375266
		319.6	0.03774
		319.68	0.0379494
		319.76	0.0381545
		319.84	0.0383555
		319.92	0.038552
		320	0.038744
		320.08	0.0389314
		320.16	0.0391141
		320.24	0.0392921
		320.32	0.0394652
		320.4	0.0396334
		320.48	0.0397966
		320.56	0.0399547
		320.64	0.0401077
		320.72	0.0402556
		320.8	0.0403982
		320.88	0.0405355
		320.96	0.0406675
		321.04	0.0407942
		321.12	0.0409155
		321.2	0.0410315
		321.28	0.041142
		321.36	0.0412471
		321.44	0.0413469
		321.52	0.0414412
		321.6	0.04153
		321.68	0.0416135
		321.76	0.0416916
		321.84	0.0417644
		321.92	0.0418318
		322	0.0418939
		322.08	0.0419507
		322.16	0.0420022
		322.24	0.0420486
		322.32	0.0420898
		322.4	0.0421259
		322.48	0.042157
		322.56	0.0421831
		322.64	0.0422042
		322.72	0.0422205
		322.8	0.0422319
		322.88	0.0422386
		322.96	0.0422407
		323.04	0.0422381
		323.12	0.0422311
		323.2	0.0422195
		323.28	0.0422037
		323.36	0.0421835
		323.44	0.0421591
		323.52	0.0421306
		323.6	0.0420981
		323.68	0.0420616
		323.76	0.0420212
		323.84	0.041977
		323.92	0.0419292
		324	0.0418777
		324.08	0.0418227
		324.16	0.0417643
		324.24	0.0417025
		324.32	0.0416374
		324.4	0.0415691
		324.48	0.0414978
		324.56	0.0414234
		324.64	0.0413461
		324.72	0.041266
		324.8	0.0411831
		324.88	0.0410975
		324.96	0.0410093
		325.04	0.0409186
		325.12	0.0408255
		325.2	0.04073
		325.28	0.0406323
		325.36	0.0405324
		325.44	0.0404303
		325.52	0.0403262
		325.6	0.0402201
		325.68	0.0401122
		325.76	0.0400024
		325.84	0.0398909
		325.92	0.0397778
		326	0.039663
		326.08	0.0395467
		326.16	0.039429
		326.24	0.0393099
		326.32	0.0391895
		326.4	0.0390679
		326.48	0.0389451
		326.56	0.0388212
		326.64	0.0386964
		326.72	0.0385705
		326.8	0.0384438
		326.88	0.0383162
		326.96	0.0381879
		327.04	0.0380589
		327.12	0.0379293
		327.2	0.0377991
		327.28	0.0376684
		327.36	0.0375373
		327.44	0.0374058
		327.52	0.037274
		327.6	0.037142
		327.68	0.0370097
		327.76	0.0368773
		327.84	0.0367449
		327.92	0.0366124
		328	0.0364799
		328.08	0.0363475
		328.16	0.0362152
		328.24	0.0360831
		328.32	0.0359513
		328.4	0.0358196
		328.48	0.0356883
		328.56	0.0355573
		328.64	0.0354266
		328.72	0.0352964
		328.8	0.0351665
		328.88	0.0350371
		328.96	0.0349082
		329.04	0.0347798
		329.12	0.0346519
		329.2	0.0345245
		329.28	0.0343976
		329.36	0.0342712
		329.44	0.0341454
		329.52	0.0340201
		329.6	0.0338953
		329.68	0.0337711
		329.76	0.0336473
		329.84	0.033524
		329.92	0.0334011
		330	0.0332787
		330.08	0.0331567
		330.16	0.0330351
		330.24	0.0329138
		330.32	0.0327928
		330.4	0.032672
		330.48	0.0325514
		330.56	0.032431
		330.64	0.0323107
		330.72	0.0321904
		330.8	0.0320701
		330.88	0.0319497
		330.96	0.0318292
		331.04	0.0317085
		331.12	0.0315875
		331.2	0.0314661
		331.28	0.0313444
		331.36	0.0312221
		331.44	0.0310993
		331.52	0.0309759
		331.6	0.0308518
		331.68	0.0307268
		331.76	0.0306011
		331.84	0.0304744
		331.92	0.0303467
		332	0.0302179
		332.08	0.0300879
		332.16	0.0299568
		332.24	0.0298244
		332.32	0.0296906
		332.4	0.0295554
		332.48	0.0294187
		332.56	0.0292804
		332.64	0.0291406
		332.72	0.0289991
		332.8	0.0288559
		332.88	0.028711
		332.96	0.0285643
		333.04	0.0284157
		333.12	0.0282652
		333.2	0.0281128
		333.28	0.0279585
		333.36	0.0278022
		333.44	0.0276439
		333.52	0.0274837
		333.6	0.0273213
		333.68	0.027157
		333.76	0.0269906
		333.84	0.0268222
		333.92	0.0266517
		334	0.0264792
		334.08	0.0263047
		334.16	0.0261282
		334.24	0.0259497
		334.32	0.0257692
		334.4	0.0255869
		334.48	0.0254026
		334.56	0.0252164
		334.64	0.0250285
		334.72	0.0248387
		334.8	0.0246473
		334.88	0.0244541
		334.96	0.0242593
		335.04	0.024063
		335.12	0.0238651
		335.2	0.0236657
		335.28	0.023465
		335.36	0.023263
		335.44	0.0230597
		335.52	0.0228552
		335.6	0.0226496
		335.68	0.022443
		335.76	0.0222354
		335.84	0.022027
		335.92	0.0218177
		336	0.0216077
		336.08	0.0213971
		336.16	0.0211859
		336.24	0.0209743
		336.32	0.0207623
		336.4	0.02055
		336.48	0.0203374
		336.56	0.0201247
		336.64	0.019912
		336.72	0.0196993
		336.8	0.0194867
		336.88	0.0192743
		336.96	0.0190622
		337.04	0.0188505
		337.12	0.0186392
		337.2	0.0184285
		337.28	0.0182183
		337.36	0.0180089
		337.44	0.0178002
		337.52	0.0175924
		337.6	0.0173854
		337.68	0.0171795
		337.76	0.0169746
		337.84	0.0167708
		337.92	0.0165683
		338	0.016367
		338.08	0.0161671
		338.16	0.0159685
		338.24	0.0157714
		338.32	0.0155758
		338.4	0.0153818
		338.48	0.0151894
		338.56	0.0149986
		338.64	0.0148096
		338.72	0.0146224
		338.8	0.014437
		338.88	0.0142534
		338.96	0.0140717
		339.04	0.013892
		339.12	0.0137142
		339.2	0.0135385
		339.28	0.0133647
		339.36	0.013193
		339.44	0.0130235
		339.52	0.0128559
		339.6	0.0126906
		339.68	0.0125273
		339.76	0.0123662
		339.84	0.0122073
		339.92	0.0120506
		340	0.011896
		340.08	0.0117436
		340.16	0.0115933
		340.24	0.0114452
		340.32	0.0112993
		340.4	0.0111556
		340.48	0.011014
		340.56	0.0108745
		340.64	0.0107371
		340.72	0.0106019
		340.8	0.0104687
		340.88	0.0103376
		340.96	0.0102085
		341.04	0.0100814
		341.12	0.00995621
		341.2	0.00983301
		341.28	0.0097117
		341.36	0.00959226
		341.44	0.00947466
		341.52	0.00935884
		341.6	0.00924478
		341.68	0.00913242
		341.76	0.00902172
		341.84	0.00891264
		341.92	0.00880513
		342	0.00869913
		342.08	0.00859461
		342.16	0.00849154
		342.24	0.00838984
		342.32	0.00828946
		342.4	0.00819037
		342.48	0.00809251
		342.56	0.00799581
		342.64	0.00790026
		342.72	0.00780579
		342.8	0.00771234
		342.88	0.00761987
		342.96	0.00752833
		343.04	0.00743768
		343.12	0.00734788
		343.2	0.00725886
		343.28	0.0071706
		343.36	0.00708303
		343.44	0.00699612
		343.52	0.00690981
		343.6	0.00682409
		343.68	0.00673891
		343.76	0.00665423
		343.84	0.00657002
		343.92	0.00648626
		344	0.00640288
		344.08	0.00631988
		344.16	0.00623724
		344.24	0.00615491
		344.32	0.00607288
		344.4	0.00599113
		344.48	0.00590962
		344.56	0.00582837
		344.64	0.00574734
		344.72	0.00566653
		344.8	0.00558591
		344.88	0.0055055
		344.96	0.00542528
		345.04	0.00534524
		345.12	0.00526537
		345.2	0.0051857
		345.28	0.00510619
		345.36	0.00502689
		345.44	0.00494779
		345.52	0.00486888
		345.6	0.00479018
		345.68	0.00471171
		345.76	0.00463346
		345.84	0.00455547
		345.92	0.00447773
		346	0.00440028
		346.08	0.00432312
		346.16	0.00424628
		346.24	0.00416977
		346.32	0.00409359
		346.4	0.00401782
		346.48	0.00394245
		346.56	0.0038675
		346.64	0.00379299
		346.72	0.00371896
		346.8	0.00364542
		346.88	0.00357239
		346.96	0.00349991
		347.04	0.00342801
		347.12	0.00335669
		347.2	0.003286
		347.28	0.00321594
		347.36	0.00314655
		347.44	0.00307785
		347.52	0.00300986
		347.6	0.0029426
		347.68	0.0028761
		347.76	0.00281038
		347.84	0.00274545
		347.92	0.00268134
		348	0.00261806
		348.08	0.00255564
		348.16	0.00249408
		348.24	0.00243341
		348.32	0.00237364
		348.4	0.00231478
		348.48	0.00225685
		348.56	0.00219985
		348.64	0.0021438
		348.72	0.00208871
		348.8	0.00203458
		348.88	0.00198141
		348.96	0.00192924
		349.04	0.00187804
		349.12	0.00182783
		349.2	0.0017786
		349.28	0.00173036
		349.36	0.00168311
		349.44	0.00163685
		349.52	0.00159158
		349.6	0.00154728
		349.68	0.00150397
		349.76	0.00146163
		349.84	0.00142025
		349.92	0.00137984
		350	0.00134038
		350.08	0.00130186
		350.16	0.00126428
		350.24	0.00122763
		350.32	0.0011919
		350.4	0.00115707
		350.48	0.00112313
		350.56	0.00109007
		350.64	0.00105789
		350.72	0.00102655
		350.8	0.000996059
		350.88	0.000966393
		350.96	0.000937539
		351.04	0.000909483
		351.12	0.000882209
		351.2	0.000855702
		351.28	0.000829947
		351.36	0.000804929
		351.44	0.000780631
		351.52	0.000757025
		351.6	0.000734122
		351.68	0.000711891
		351.76	0.000690305
		351.84	0.000669373
		351.92	0.000649066
		352	0.000629369
		352.08	0.000610266
		352.16	0.000591742
		352.24	0.000573768
		352.32	0.000556343
		352.4	0.000539465
		352.48	0.000523104
		352.56	0.000507246
		352.64	0.000491866
		352.72	0.000476974
		352.8	0.000462494
		352.88	0.000448515
		352.96	0.00043497
		353.04	0.000421845
		353.12	0.000409129
		353.2	0.000396809
		353.28	0.000384872
		353.36	0.000373306
		353.44	0.000362101
		353.52	0.000351245
		353.6	0.000340726
		353.68	0.000330535
		353.76	0.00032066
		353.84	0.000311092
		353.92	0.000301821
		354	0.000292837
		354.08	0.000284119
		354.16	0.000275682
		354.24	0.000267506
		354.32	0.00025957
		354.4	0.00025189
		354.48	0.000244446
		354.56	0.00023723
		354.64	0.000230235
		354.72	0.000223453
		354.8	0.000216853
		354.88	0.000210479
		354.96	0.000204286
		355.04	0.000198281
		355.12	0.00019247
		355.2	0.000186834
		355.28	0.000181367
		355.36	0.000176052
		355.44	0.000170909
		355.52	0.00016592
		355.6	0.000161079
		355.68	0.000156382
		355.76	0.000151824
		355.84	0.000147402
		355.92	0.00014311
		356	0.000138945
		356.08	0.000134902
		356.16	0.000130978
		356.24	0.000127157
		356.32	0.000123461
		356.4	0.000119861
		356.48	0.000116379
		356.56	0.000112998
		356.64	0.000109716
		356.72	0.000106529
		356.8	0.000103434
		356.88	0.000100429
		356.96	9.75108e-05
		357.04	9.46771e-05
		357.12	9.19252e-05
		357.2	8.92527e-05
		357.28	8.66444e-05
		357.36	8.41244e-05
		357.44	8.16769e-05
		357.52	7.92997e-05
		357.6	7.69786e-05
		357.68	7.47365e-05
		357.76	7.25587e-05
		357.84	7.04432e-05
		357.92	6.83883e-05
		358	6.63922e-05
		358.08	6.4441e-05
		358.16	6.25582e-05
		358.24	6.07292e-05
		358.32	5.894e-05
		358.4	5.72146e-05
		358.48	5.55384e-05
		358.56	5.391e-05
		358.64	5.23281e-05
		358.72	5.07912e-05
		358.8	4.92981e-05
		358.88	4.78475e-05
		358.96	4.64383e-05
		359.04	4.50692e-05
		359.12	4.37391e-05
		359.2	4.24469e-05
		359.28	4.11916e-05
		359.36	3.9972e-05
		359.44	3.87871e-05
		359.52	3.76361e-05
		359.6	3.65051e-05
		359.68	3.54072e-05
		359.76	3.43543e-05
		359.84	3.33313e-05
		359.92	3.23373e-05
		360	3.13716e-05
		360.08	3.04333e-05
		360.16	2.95218e-05
		360.24	2.86362e-05
		360.32	2.77758e-05
		360.4	2.694e-05
		360.48	2.61281e-05
		360.56	2.53393e-05
		360.64	2.45732e-05
		360.72	2.38289e-05
		360.8	2.30937e-05
		360.88	2.23924e-05
		360.96	2.17112e-05
		361.04	2.10496e-05
		361.12	2.0407e-05
		361.2	1.97828e-05
		361.28	1.91766e-05
		361.36	1.85879e-05
		361.44	1.80161e-05
		361.52	1.74486e-05
		361.6	1.69104e-05
		361.68	1.63877e-05
		361.76	1.58801e-05
		361.84	1.53873e-05
		361.92	1.49087e-05
		362	1.44441e-05
		362.08	1.39929e-05
		362.16	1.3555e-05
		362.24	1.31298e-05
		362.32	1.2717e-05
		362.4	1.23163e-05
		362.48	1.19274e-05
		362.56	1.155e-05
		362.64	1.11836e-05
		362.72	1.08281e-05
		362.8	1.0483e-05
		362.88	1.01482e-05
		362.96	9.82333e-06
		363.04	9.50811e-06
		363.12	9.20227e-06
		363.2	8.90557e-06
		363.28	8.61774e-06
		363.36	8.33854e-06
		363.44	8.06772e-06
		363.52	7.80506e-06
		363.6	7.55032e-06
		363.68	7.30328e-06
		363.76	7.06373e-06
		363.84	6.83145e-06
		363.92	6.60624e-06
		364	6.38791e-06
		364.08	6.17625e-06
		364.16	5.97108e-06
		364.24	5.77222e-06
		364.32	5.57948e-06
		364.4	5.39269e-06
		364.48	5.21169e-06
		364.56	5.02383e-06
		364.64	4.8546e-06
		364.72	4.69063e-06
		364.8	4.53178e-06
		364.88	4.3779e-06
		364.96	4.22884e-06
		365.04	4.08446e-06
		365.12	3.94464e-06
		365.2	3.80924e-06
		365.28	3.67812e-06
		365.36	3.55118e-06
		365.44	3.42828e-06
		365.52	3.30931e-06
		365.6	3.19415e-06
		365.68	3.0827e-06
		365.76	2.97484e-06
		365.84	2.87047e-06
		365.92	2.76948e-06
		366	2.67177e-06
		366.08	2.57725e-06
		366.16	2.48583e-06
		366.24	2.3974e-06
		366.32	2.29962e-06
		366.4	2.21785e-06
		366.48	2.13876e-06
		366.56	2.04978e-06
		366.64	1.97649e-06
		366.72	1.9056e-06
		366.8	1.83705e-06
		366.88	1.77077e-06
		366.96	1.70668e-06
		367.04	1.64472e-06
		367.12	1.58483e-06
		367.2	1.52695e-06
		367.28	1.47102e-06
		367.36	1.41697e-06
		367.44	1.36476e-06
		367.52	1.31431e-06
		367.6	1.26559e-06
		367.68	1.21854e-06
		367.76	1.1731e-06
		367.84	1.12923e-06
		367.92	1.08687e-06
		368	1.04599e-06
		368.08	1.00653e-06
		368.16	9.68444e-07
		368.24	9.31695e-07
		368.32	8.9624e-07
		368.4	8.62035e-07
		368.48	8.29041e-07
		368.56	7.9722e-07
		368.64	7.66533e-07
		368.72	7.36943e-07
		368.8	7.08414e-07
		368.88	6.80913e-07
		368.96	6.54405e-07
		369.04	6.28857e-07
		369.12	6.04238e-07
		369.2	5.80516e-07
		369.28	5.57663e-07
		369.36	5.35648e-07
		369.44	5.14444e-07
		369.52	4.94023e-07
		369.6	4.74358e-07
		369.68	4.55425e-07
		369.76	4.37197e-07
		369.84	4.19651e-07
		369.92	4.02764e-07
[truncated: 1 more rows]

## Sheet: PlotDat28
Source sheet	TO-19-16 UPb_All_Integrations	0.393	0.05331	0.375503	0.0515	0.37317	0.0512188	0.418701	0.0536154	0.416582	0.053609	0.436597	0.0533811	0.441597	0.0539564	0.422373	0.0540226	0.42703	0.0539012	0.430925	0.0540749	0.419373	0.0543485	0.397254	0.0539666	0.421373	0.054288	0.409597	0.0542214	0.428254	0.0538134	0.411806	0.0539149	0.420268	0.0543263	0.476836	0.0542395	0.416477	0.054167	0.407597	0.0540156	0.428149	0.054135	0.472492	0.0541318	0.400477	0.0543346	0.412373	0.0538342
Plot name	Concordia25	0.397	0.05353	0.375503	0.0515	0.375877	0.051545	0.41845	0.0537165	0.416391	0.053756	0.436299	0.0535238	0.441298	0.0541201	0.422085	0.0541838	0.426813	0.0540079	0.430662	0.054226	0.419084	0.0544927	0.397027	0.0541531	0.421087	0.0543595	0.409299	0.0543636	0.428026	0.0539251	0.411603	0.0540425	0.419935	0.0545304	0.476652	0.0543721	0.416239	0.0543089	0.407299	0.0541653	0.427874	0.0542878	0.472146	0.054295	0.400237	0.0545168	0.412086	0.0540193
Plot Type	1	0.406	0.05335	0.376933	0.051672	0.37859	0.0518713	0.417703	0.0538097	0.415822	0.0538986	0.435411	0.0536631	0.44041	0.0542774	0.421232	0.0543355	0.426172	0.0541041	0.429879	0.0543687	0.418229	0.0546232	0.396352	0.0543346	0.420234	0.0544256	0.408411	0.0545019	0.427351	0.0540304	0.410999	0.0541655	0.418941	0.05473	0.476105	0.0545016	0.415528	0.0544466	0.406411	0.0543118	0.427056	0.0544323	0.471116	0.0544526	0.399526	0.0546909	0.411233	0.0541982
1st free col	63	0.411	0.05379	0.378363	0.0518441	0.381308	0.0521977	0.416476	0.0538932	0.414887	0.0540341	0.433951	0.0537963	0.438949	0.0544251	0.419828	0.0544749	0.425119	0.0541879	0.428593	0.0545004	0.416825	0.0547375	0.395242	0.0545077	0.418832	0.0544853	0.406951	0.0546335	0.42624	0.0541273	0.410005	0.0542817	0.417305	0.0549212	0.475198	0.0546269	0.41436	0.0545773	0.404951	0.0544523	0.425711	0.0545656	0.469422	0.0546016	0.398356	0.0548535	0.409831	0.0543675
Sigma Level	2	0.393	0.0537	0.379796	0.0520161	0.384031	0.0525242	0.414791	0.0539653	0.413604	0.0541597	0.431947	0.0539209	0.436944	0.0545606	0.417903	0.0545992	0.423674	0.0542577	0.426828	0.0546184	0.414899	0.0548334	0.393718	0.054669	0.416908	0.0545372	0.404946	0.0547559	0.424716	0.054214	0.408642	0.0543887	0.415061	0.0551004	0.47394	0.0547467	0.412756	0.0546986	0.402947	0.0545839	0.423866	0.0546852	0.467097	0.0547391	0.396751	0.0550014	0.407906	0.0545237
Absolute Errs	TRUE	0.405	0.05347	0.381229	0.0521882	0.38676	0.0528508	0.412683	0.0540246	0.411998	0.0542731	0.429438	0.0540343	0.434434	0.054681	0.415493	0.054706	0.421866	0.0543123	0.424619	0.0547206	0.412488	0.054909	0.391811	0.0548153	0.414499	0.0545805	0.402437	0.0548667	0.422808	0.0542887	0.406935	0.0544844	0.41225	0.055264	0.472341	0.0548602	0.410749	0.0548079	0.400438	0.0547042	0.421556	0.0547887	0.464186	0.0548624	0.394743	0.0551318	0.405497	0.0546639
Symbol Type	1	0.404	0.0538	0.382665	0.0523604	0.389494	0.0531775	0.410191	0.0540701	0.4101	0.054372	0.426473	0.0541344	0.431468	0.0547841	0.412645	0.0547932	0.419729	0.0543504	0.422008	0.0548048	0.409639	0.0549628	0.389557	0.0549438	0.411652	0.0546142	0.399472	0.0549637	0.420554	0.05435	0.404918	0.054567	0.408929	0.0554088	0.470415	0.0549664	0.408376	0.0549034	0.397473	0.0548107	0.418827	0.0548742	0.460746	0.0549691	0.392369	0.0552421	0.40265	0.0547853
Inverse Plot	FALSE	0.39	0.05379	0.384101	0.0525325	0.392234	0.0535043	0.407365	0.0541007	0.407947	0.0544545	0.423109	0.0542193	0.428104	0.0548678	0.409414	0.0548592	0.417306	0.0543714	0.419047	0.0548694	0.406408	0.0549937	0.387	0.055052	0.408422	0.0546376	0.396108	0.0550451	0.417997	0.0543967	0.402631	0.0546348	0.405162	0.0555321	0.468179	0.0550643	0.405685	0.054983	0.394109	0.0549015	0.415732	0.0549399	0.456844	0.0550571	0.389677	0.0553302	0.39942	0.0548856
Color Plot	TRUE	0.374	0.0539	0.385539	0.0527047	0.394979	0.0538312	0.404259	0.054116	0.40558	0.054519	0.419412	0.0542872	0.424407	0.0549305	0.405865	0.0549025	0.414643	0.0543748	0.415793	0.0549132	0.402858	0.0550012	0.38419	0.0551377	0.404873	0.0546505	0.392411	0.0551093	0.415187	0.0544279	0.400116	0.0546866	0.401021	0.0556313	0.46565	0.0551532	0.402727	0.0550452	0.390412	0.0549748	0.41233	0.0549846	0.452555	0.0551248	0.386719	0.0553943	0.395871	0.0549628
3D plot	FALSE	0.392	0.05409	0.386979	0.0528769	0.397729	0.0541582	0.400934	0.0541156	0.403047	0.0545643	0.415454	0.0543369	0.420449	0.0549711	0.402064	0.0549225	0.411793	0.0543607	0.41231	0.0549354	0.399057	0.0549852	0.381182	0.0551994	0.401073	0.0546524	0.388453	0.055155	0.412179	0.054443	0.397425	0.0547214	0.396588	0.0557047	0.462852	0.0552322	0.399561	0.0550888	0.386454	0.055029	0.408688	0.0550074	0.447964	0.0551707	0.383552	0.0554333	0.392071	0.0550155
Linear	FALSE	0.379	0.05416	0.38842	0.0530492	0.400485	0.0544853	0.397454	0.0540995	0.400396	0.0545894	0.411312	0.0543674	0.416307	0.0549886	0.398088	0.0549187	0.40881	0.0543292	0.408664	0.0549355	0.39508	0.0549459	0.378034	0.0552357	0.397097	0.0546434	0.384311	0.0551813	0.409031	0.0544417	0.394608	0.0547384	0.39195	0.0557507	0.459808	0.0553006	0.396247	0.055113	0.382313	0.0550632	0.404877	0.0550079	0.443159	0.0551941	0.380238	0.0554463	0.388095	0.0550425
Data Range	D304:H330	0.405	0.0536	0.389863	0.0532215	0.403246	0.0548125	0.393888	0.054068	0.397679	0.0545939	0.407067	0.054378	0.412061	0.0549829	0.394012	0.0548911	0.405753	0.054281	0.404928	0.0549134	0.391005	0.0548841	0.374808	0.0552461	0.393022	0.0546236	0.380066	0.0551877	0.405804	0.054424	0.391721	0.0547373	0.387195	0.0557684	0.456543	0.055358	0.392851	0.0551172	0.378067	0.0550768	0.400971	0.054986	0.438235	0.0551944	0.376842	0.055433	0.384019	0.0550434
Filled Symbols	FALSE	0.391	0.05381	0.391307	0.0533938	0.406013	0.0551398	0.390305	0.0540218	0.394949	0.0545778	0.402801	0.0543687	0.407795	0.0549539	0.389917	0.0548404	0.402682	0.054217	0.401174	0.0548697	0.386909	0.054801	0.371566	0.0552303	0.388926	0.0545934	0.3758	0.0551742	0.402562	0.0543903	0.388821	0.0547182	0.382417	0.0557576	0.453086	0.0554038	0.389438	0.0551015	0.373801	0.0550694	0.397047	0.0549422	0.433286	0.0551717	0.373429	0.0553939	0.379924	0.0550182
ConcAge	FALSE	0.386	0.0543	0.392753	0.0535661	0.408785	0.0554672	0.386774	0.0539617	0.392259	0.0545412	0.398597	0.0543395	0.403592	0.0549023	0.385881	0.0547675	0.399655	0.0541384	0.397475	0.0548052	0.382874	0.0546982	0.368371	0.0551886	0.384891	0.0545534	0.371596	0.0551409	0.399367	0.0543411	0.385962	0.0546814	0.377709	0.0557184	0.449466	0.0554377	0.386075	0.0550661	0.369597	0.0550411	0.39318	0.0548774	0.42841	0.0551263	0.370066	0.0553295	0.375888	0.0549673
ConcSwap	FALSE	0.434	0.054	0.3942	0.0537384	0.411563	0.0557947	0.383364	0.0538889	0.38966	0.0544849	0.394537	0.0542911	0.399532	0.054829	0.381985	0.0546738	0.396733	0.0540469	0.393903	0.0547211	0.378978	0.0545778	0.365285	0.0551218	0.380993	0.0545044	0.367536	0.0550885	0.396282	0.0542776	0.383202	0.0546276	0.373162	0.0556517	0.445715	0.0554592	0.382828	0.0550117	0.365538	0.0549926	0.389445	0.0547927	0.423701	0.0550593	0.366819	0.0552413	0.371991	0.0548917
1st Symbol-row	1	0.392	0.05409	0.395649	0.0539108	0.414346	0.0561223	0.380142	0.0538049	0.387205	0.0544101	0.390701	0.0542244	0.395696	0.0547355	0.378302	0.0545611	0.393972	0.0539441	0.390528	0.0546191	0.375296	0.054442	0.36237	0.0550312	0.37731	0.0544474	0.3637	0.055018	0.393367	0.0542009	0.380593	0.054558	0.368865	0.0555586	0.441863	0.0554683	0.379758	0.0549393	0.361701	0.0549248	0.385916	0.0546899	0.41925	0.0549718	0.36375	0.0551308	0.368308	0.054793
		0.377	0.054	0.397099	0.0540832	0.417135	0.05645	0.37717	0.0537113	0.384941	0.0543181	0.387162	0.0541406	0.392158	0.0546235	0.374906	0.0544317	0.391425	0.0538321	0.387414	0.0545011	0.3719	0.0542935	0.359681	0.0549186	0.373913	0.0543834	0.360161	0.0549309	0.390678	0.0541124	0.378187	0.0544737	0.364901	0.055441	0.437944	0.0554649	0.376928	0.0548504	0.358162	0.054839	0.382661	0.054571	0.415146	0.0548656	0.36092	0.0550002	0.364911	0.054673
		0.4	0.05386	0.39855	0.0542557	IsoLine	IsoLine	0.374506	0.0536098	0.382911	0.0542108	0.38399	0.0540415	0.388986	0.0544954	0.371862	0.054288	0.389142	0.053713	0.384624	0.0543695	0.368857	0.0541352	0.35727	0.0547862	0.370868	0.0543136	0.356989	0.0548287	0.388268	0.054014	0.37603	0.0543766	0.361349	0.0553012	0.433992	0.055449	0.37439	0.0547468	0.35499	0.0547368	0.379744	0.0544382	0.411466	0.0547427	0.358384	0.0548521	0.361867	0.054534
		0.437	0.05401	0.400004	0.0544282			0.372202	0.0535025	0.381155	0.0540902	0.381246	0.0539289	0.386243	0.0543535	0.369229	0.0541329	0.387168	0.0535892	0.38221	0.0542268	0.366225	0.0539702	0.355185	0.0546365	0.368235	0.0542395	0.354245	0.0547135	0.386183	0.0539076	0.374165	0.0542684	0.358276	0.0551419	0.43004	0.0554207	0.372195	0.0546303	0.352246	0.0546204	0.37722	0.0542941	0.408284	0.0546056	0.35619	0.0546894	0.359233	0.0543788
		0.376	0.0541	0.401458	0.0546007			0.370303	0.0533914	0.379708	0.0539587	0.378984	0.053805	0.383982	0.0542007	0.367059	0.0539694	0.385542	0.0534631	0.380221	0.0540758	0.364056	0.0538017	0.353466	0.0544725	0.366064	0.0541626	0.351984	0.0545876	0.384465	0.0537951	0.372627	0.0541513	0.355742	0.0549662	0.426121	0.0553803	0.370386	0.0545033	0.349984	0.0544918	0.375141	0.0541416	0.40566	0.0544568	0.354382	0.0545152	0.357062	0.0542104
		0.383	0.0537	0.402915	0.0547732			0.368846	0.0532788	0.378597	0.0538189	0.377248	0.0536723	0.382246	0.0540399	0.365394	0.0538006	0.384294	0.0533371	0.378695	0.0539194	0.362391	0.053633	0.352147	0.0542973	0.364397	0.0540842	0.350248	0.0544533	0.383146	0.0536789	0.371447	0.0540276	0.353798	0.0547776	0.42227	0.0553281	0.368998	0.0543683	0.348248	0.0543536	0.373545	0.0539836	0.403647	0.0542994	0.352994	0.054333	0.355396	0.054032
		0.406	0.0537	0.404372	0.0549457			0.367858	0.0531668	0.377845	0.0536735	0.376072	0.0535333	0.38107	0.0538742	0.364266	0.0536299	0.383448	0.0532138	0.377661	0.0537607	0.361265	0.0534673	0.351254	0.0541145	0.363268	0.0540059	0.349071	0.0543133	0.382253	0.0535611	0.370648	0.0538996	0.35248	0.0545796	0.418518	0.0552646	0.368057	0.0542278	0.347072	0.0542086	0.372464	0.0538232	0.402282	0.0541364	0.352055	0.0541462	0.354268	0.0538472
		0.397	0.05325	0.405832	0.0551183			0.367361	0.0530575	0.377465	0.0535253	0.375478	0.0533907	0.380477	0.0537068	0.363698	0.0534605	0.383023	0.0530954	0.37714	0.0536028	0.360697	0.0533079	0.350803	0.0539274	0.362698	0.0539292	0.348478	0.0541704	0.381803	0.0534441	0.370245	0.0537699	0.351815	0.0543762	0.414899	0.0551903	0.367582	0.0540847	0.346478	0.0540595	0.371919	0.0536636	0.401594	0.0539709	0.351581	0.0539585	0.353698	0.0536596
		0.393	0.05392	0.407292	0.0552909			0.367362	0.0529532	0.377466	0.0533771	0.375478	0.0532473	0.380478	0.0535411	0.363699	0.0532958	0.383025	0.0529843	0.377141	0.0534487	0.3607	0.0531579	0.350803	0.0537398	0.362699	0.0538557	0.348478	0.0540272	0.381804	0.0533301	0.370245	0.0536409	0.351815	0.0541714	0.411443	0.0551059	0.367582	0.0539417	0.346478	0.0539093	0.37192	0.0535077	0.401594	0.0538061	0.351583	0.0537735	0.353699	0.0534727
		0.374	0.05348	0.408755	0.0554636			0.367862	0.0528558	0.377847	0.053232	0.376072	0.053106	0.381073	0.0533803	0.364272	0.053139	0.383455	0.0528826	0.377666	0.0533015	0.361273	0.0530202	0.351255	0.0535553	0.36327	0.0537867	0.349072	0.0538866	0.382256	0.0532213	0.37065	0.0535153	0.352481	0.053969	0.408179	0.055012	0.368058	0.0538015	0.347072	0.0537608	0.372468	0.0533587	0.402284	0.0536453	0.35206	0.0535949	0.35427	0.0532902
		0.375	0.05367	0.410218	0.0556362			0.368852	0.0527673	0.3786	0.0530926	0.377249	0.0529694	0.382251	0.0532274	0.365403	0.0529931	0.384304	0.0527924	0.378702	0.0531639	0.362405	0.0528975	0.35215	0.0533776	0.3644	0.0537237	0.350249	0.0537513	0.383151	0.05312	0.37145	0.0533954	0.353799	0.0537731	0.405136	0.0549095	0.369	0.053667	0.348249	0.053617	0.373552	0.0532195	0.40365	0.0534916	0.353003	0.0534262	0.355401	0.0531157
		0.388	0.05432	0.411684	0.0558089			0.370311	0.0526893	0.379712	0.0529617	0.378985	0.0528402	0.383988	0.0530854	0.367071	0.0528609	0.385556	0.0527153	0.380232	0.0530387	0.364075	0.0527921	0.35347	0.05321	0.366067	0.0536677	0.351986	0.053624	0.384472	0.053028	0.372632	0.0532835	0.355743	0.0535874	0.402339	0.0547992	0.370389	0.0535407	0.349985	0.0534806	0.375151	0.0530927	0.405664	0.053348	0.354394	0.0532705	0.357068	0.0529526
		IsoLine	IsoLine	0.413151	0.0559817			0.372212	0.0526234	0.38116	0.052842	0.381247	0.0527209	0.38625	0.0529572	0.369244	0.0527451	0.387187	0.052653	0.382224	0.0529284	0.366249	0.0527062	0.35519	0.0530558	0.368239	0.05362	0.354248	0.0535071	0.386192	0.0529471	0.37417	0.0531819	0.358277	0.0534156	0.399812	0.0546821	0.372199	0.0534251	0.352247	0.0533544	0.377233	0.0529809	0.408288	0.0532173	0.356205	0.053131	0.35924	0.052804
				0.414619	0.0561544			0.374518	0.0525709	0.382917	0.0527356	0.383991	0.0526138	0.388995	0.0528452	0.37188	0.0526478	0.389164	0.0526066	0.384639	0.052835	0.368885	0.0526413	0.357275	0.0529181	0.370873	0.0535815	0.356992	0.053403	0.388278	0.0528789	0.376037	0.0530926	0.36135	0.0532611	0.397576	0.0545592	0.374395	0.0533225	0.354991	0.0532407	0.379759	0.0528862	0.411472	0.0531021	0.358401	0.0530104	0.361875	0.0526729
				0.416089	0.0563272			0.377184	0.0525327	0.384948	0.0526446	0.387164	0.0525211	0.392168	0.0527515	0.374926	0.0525711	0.391449	0.0525769	0.387432	0.0527604	0.371932	0.0525989	0.359687	0.0527994	0.373919	0.0535528	0.360164	0.0533135	0.39069	0.0528247	0.378194	0.0530172	0.364903	0.0531267	0.395652	0.0544315	0.376933	0.0532348	0.358163	0.0531418	0.382678	0.0528104	0.415152	0.0530044	0.36094	0.0529109	0.364921	0.0525618
				0.41756	0.0565			0.380157	0.0525097	0.387213	0.0525709	0.390702	0.0524446	0.395707	0.0526781	0.378325	0.0525163	0.393999	0.0525647	0.390547	0.052706	0.375331	0.0525796	0.362377	0.0527022	0.377317	0.0535346	0.363703	0.0532406	0.39338	0.0527857	0.380601	0.0529572	0.368867	0.0530152	0.394054	0.0543001	0.379764	0.0531637	0.361702	0.0530596	0.385935	0.0527551	0.419257	0.0529264	0.363772	0.0528346	0.368319	0.0524728
				0.41756	0.0565			0.38338	0.0525022	0.389668	0.0525159	0.394539	0.0523856	0.399544	0.0526264	0.382009	0.0524845	0.396762	0.05257	0.393924	0.0526729	0.379016	0.0525838	0.365293	0.0526284	0.381	0.0535272	0.36754	0.0531855	0.396296	0.0527625	0.38321	0.0529138	0.373164	0.0529287	0.392797	0.0541662	0.382834	0.0531106	0.365539	0.0529957	0.389465	0.0527212	0.423708	0.0528695	0.366842	0.052783	0.372002	0.0524077
				IsoLine	IsoLine			0.386791	0.0525105	0.392267	0.0524806	0.398599	0.0523454	0.403604	0.0525972	0.385907	0.0524764	0.399686	0.0525929	0.397497	0.0526618	0.382914	0.0526116	0.368378	0.0525792	0.384897	0.0535307	0.3716	0.0531494	0.399382	0.0527556	0.385971	0.0528879	0.377711	0.0528689	0.391892	0.0540309	0.386081	0.0530767	0.369598	0.0529513	0.393201	0.0527096	0.428418	0.0528347	0.370091	0.052757	0.3759	0.0523678
								0.390322	0.0525344	0.394957	0.0524657	0.402803	0.0523248	0.407808	0.0525913	0.389943	0.0524922	0.402713	0.0526329	0.401197	0.0526728	0.38695	0.0526623	0.371573	0.0525558	0.388933	0.0535452	0.375804	0.053133	0.402577	0.0527651	0.38883	0.0528799	0.382419	0.0528369	0.391346	0.0538952	0.389445	0.0530624	0.373802	0.0529274	0.397068	0.0527203	0.433294	0.0528228	0.373454	0.0527571	0.379936	0.0523538
								0.393906	0.0525733	0.397688	0.0524716	0.407069	0.0523241	0.412074	0.0526087	0.394038	0.0525314	0.405784	0.0526891	0.404951	0.0527058	0.391046	0.0527349	0.374815	0.0525585	0.393029	0.0535702	0.38007	0.0531365	0.405819	0.0527909	0.391731	0.05289	0.387197	0.0528334	0.391164	0.0537605	0.392857	0.0530681	0.378068	0.0529243	0.400993	0.0527532	0.438243	0.0528341	0.376867	0.0527833	0.384031	0.0523659
								0.397472	0.0526266	0.400405	0.052498	0.411314	0.0523434	0.416319	0.0526491	0.398113	0.0525934	0.408841	0.0527606	0.408687	0.05276	0.395121	0.052828	0.378042	0.0525874	0.397104	0.0536054	0.384315	0.05316	0.409045	0.0528324	0.394617	0.052918	0.391952	0.0528585	0.391348	0.0536279	0.396254	0.0530938	0.382314	0.0529422	0.404899	0.0528076	0.443167	0.0528682	0.380263	0.0528352	0.388107	0.0524041
								0.400951	0.0526932	0.403055	0.0525445	0.415456	0.0523823	0.420461	0.0527118	0.402089	0.0526769	0.411822	0.0528458	0.412331	0.0528345	0.399096	0.0529399	0.381189	0.0526418	0.40108	0.05365	0.388457	0.053203	0.412193	0.0528889	0.397434	0.0529634	0.396591	0.0529116	0.391895	0.0534984	0.399567	0.0531388	0.386455	0.0529806	0.408709	0.0528826	0.447972	0.0529246	0.383576	0.0529117	0.392083	0.0524675
								0.404275	0.0527718	0.405588	0.0526103	0.419414	0.05244	0.424419	0.0527954	0.405888	0.0527803	0.414671	0.0529432	0.415813	0.0529278	0.402895	0.0530684	0.384197	0.0527206	0.404879	0.0537031	0.392415	0.0532645	0.4152	0.0529592	0.400125	0.0530253	0.401023	0.0529917	0.392802	0.0533731	0.402733	0.0532023	0.390413	0.0530389	0.41235	0.0529765	0.452562	0.053002	0.386742	0.0530113	0.395882	0.0525549
								0.407379	0.0528608	0.407954	0.0526939	0.42311	0.0525155	0.428115	0.0528983	0.409436	0.0529017	0.417332	0.0530509	0.419066	0.0530381	0.406442	0.0532108	0.387006	0.0528225	0.408428	0.0537638	0.396111	0.0533435	0.418009	0.053042	0.402638	0.0531024	0.405164	0.0530973	0.39406	0.0532533	0.40569	0.0532832	0.39411	0.0531159	0.41575	0.0530877	0.45685	0.0530991	0.389698	0.0531322	0.39943	0.0526645
								0.410204	0.0529586	0.410106	0.0527938	0.426474	0.0526071	0.431478	0.0530186	0.412664	0.0530385	0.419752	0.0531667	0.422025	0.0531632	0.40967	0.0533646	0.389563	0.0529453	0.411657	0.0538309	0.399475	0.0534384	0.420565	0.0531356	0.404925	0.0531933	0.408931	0.0532263	0.395659	0.0531398	0.408381	0.0533797	0.397474	0.0532102	0.418844	0.0532139	0.460752	0.0532139	0.392388	0.0532718	0.402659	0.0527943
								0.412694	0.0530633	0.412003	0.052908	0.429439	0.0527133	0.434443	0.053154	0.415509	0.0531883	0.421886	0.0532884	0.424633	0.0533006	0.412514	0.0535266	0.391816	0.0530867	0.414503	0.053903	0.40244	0.0535474	0.422818	0.0532383	0.406941	0.0532963	0.412252	0.0533762	0.397585	0.0530336	0.410753	0.05349	0.400439	0.0533197	0.42157	0.0533526	0.464191	0.0533443	0.394759	0.0534276	0.405505	0.0529418
								0.414801	0.0531727	0.413609	0.0530343	0.431948	0.0528318	0.436951	0.0533017	0.417917	0.053348	0.423691	0.0534137	0.42684	0.0534478	0.414921	0.0536938	0.393722	0.0532439	0.416912	0.0539787	0.404949	0.0536682	0.424724	0.053348	0.408647	0.0534092	0.415062	0.0535441	0.399821	0.0529357	0.41276	0.053612	0.402948	0.0534426	0.423878	0.0535013	0.467101	0.0534875	0.396765	0.0535964	0.407913	0.053104
								0.416483	0.0532848	0.414891	0.0531703	0.433952	0.0529604	0.438954	0.0534589	0.419839	0.0535145	0.425131	0.05354	0.428602	0.0536019	0.416842	0.0538628	0.395245	0.0534139	0.418835	0.0540566	0.406952	0.0537987	0.426246	0.0534627	0.410009	0.0535299	0.417306	0.0537267	0.40235	0.0528468	0.414363	0.0537434	0.404952	0.0535762	0.42572	0.0536569	0.469426	0.053641	0.398366	0.0537751	0.409836	0.0532778
								0.417708	0.0533974	0.415825	0.0533133	0.435412	0.0530966	0.440413	0.0536226	0.421239	0.0536847	0.426181	0.053665	0.429885	0.0537598	0.418241	0.0540304	0.396354	0.0535934	0.420236	0.0541351	0.408412	0.0539361	0.427355	0.05358	0.411001	0.053656	0.418941	0.0539205	0.405148	0.0527678	0.41553	0.0538814	0.406412	0.0537182	0.427062	0.0538165	0.471119	0.0538016	0.399533	0.0539601	0.411237	0.0534598
								0.418452	0.0535084	0.416392	0.0534605	0.436299	0.0532377	0.4413	0.0537895	0.422089	0.0538552	0.426817	0.0537862	0.430665	0.0539185	0.41909	0.0541934	0.397028	0.0537788	0.421088	0.0542128	0.409299	0.054078	0.428028	0.0536977	0.411604	0.0537852	0.419935	0.0541216	0.408192	0.0526994	0.41624	0.0540236	0.407299	0.0538656	0.427877	0.0539769	0.472147	0.0539663	0.400241	0.0541478	0.412088	0.0536465
								0.418701	0.0536154	0.416582	0.053609	0.436597	0.0533811	0.441597	0.0539564	0.422373	0.0540226	0.42703	0.0539012	0.430925	0.0540749	0.419373	0.0543485	0.397254	0.0539666	0.421373	0.054288	0.409597	0.0542214	0.428254	0.0538134	0.411806	0.0539149	0.420268	0.0543263	0.411457	0.052642	0.416477	0.054167	0.407597	0.0540156	0.428149	0.054135	0.472492	0.0541318	0.400477	0.0543346	0.412373	0.0538342
																																				0.414914	0.0525962
																																				0.418534	0.0525623
																																				0.422285	0.0525408
																																				0.426137	0.0525317
																																				0.430056	0.0525351
																																				0.434008	0.052551
																																				0.43796	0.0525793
																																				0.441879	0.0526197
																																				0.44573	0.0526719
																																				0.449482	0.0527354
																																				0.453101	0.0528097
																																				0.456557	0.0528941
																																				0.459821	0.052988
																																				0.462864	0.0530905
																																				0.465661	0.0532008
																																				0.468188	0.0533179
																																				0.470424	0.0534408
																																				0.472348	0.0535685
																																				0.473946	0.0536999
																																				0.475203	0.0538338
																																				0.476108	0.0539691
																																				0.476654	0.0541048
																																				0.476836	0.0542395
[truncated: 12 more columns]

## Sheet: PlotDat29
Source sheet	TO-19-16 UPb_All_Integrations	0.3	337.89	1	334.4	5
Plot name	Average26	27.7	337.89	2	334.8	4
Plot Type	15			3	335	5.2
1st free col	8			4	335.8	5.4
Sigma Level	2			5	336.1	5.3
Absolute Errs	TRUE			6	336.6	4.2
Symbol Type	1			7	336.9	4.1
Inverse Plot	FALSE			8	337	6
Color Plot	TRUE			9	337.1	7.7
3D plot	FALSE			10	337.3	6.2
Linear	FALSE			11	337.4	6.4
Data Range	S304:T330			12	337.7	6
Filled Symbols	FALSE			13	337.7	6
ConcAge	FALSE			14	337.8	5.7
ConcSwap	FALSE			15	337.9	4.6
1st Symbol-row	1			16	338.2	5.7
				17	338.5	6.8
				18	338.5	4.8
				19	339	5.4
				20	339.1	6
				21	339.2	7.1
				22	339.4	7
				23	339.5	5.1
				24	339.6	2.8
				25	340	5.1
				26	340.5	7.3
				27	340.9	3.9
				IsoLine	IsoLine	IsoLine	IsoLine

[truncated: 4 more sheets: PlotDat3, PlotDat4, PlotDat6, PlotDat7]
